*PLOS ONE* would like to thank all those who reviewed on behalf of the journal in 2016:

Gopal K.  
Hakhyun Ka  
Anne Marije Kaag  
Anu Kaakinen  
Johannes Kaanders  
Tommi Kääriäinen  
Achim Kaasch  
Valtteri Kaasinen  
Anna Kaatz  
Martin Kaatz  
David Kaawa-Mafigiri  
Conrad Kabali  
Tamon Kabata  
David Kabelik  
Parijat Kabiraj  
Nadja Kabisch  
Sandor Kabos  
Gilberto Kac  
Shannon Kachel  
Markus Kächele  
Sumita Kachhwaha  
Amir Kachooei  
Priyanka Kachroo  
Tim Kacprowski  
Petra Kaczensky  
Andreas Kaczmarczyk  
Leonard K. Kaczmarek  
Lukasz Kaczmarek  
Monika Kaczmarek  
Sandeep Kadam  
Assaf Kadar  
John Kaddis  
Hussein Kaddour  
Mark Kaddumukasa  
Rajendra Kadel  
Fazlul Kader  
Paul Kadetz  
Mohannad Kadhum  
Pinar Kadiroglu  
Krishna Kadirvelu  
Mikiko Kadohisa  
James Kadonaga  
Takafumi Kadono  
Narendra Kadoo  
Mariko Kadota

Mitsutaka Kadota  
Komei Kadowaki  
Norimitsu Kadowaki  
Giouliana Kadra  
Milosz Kadzinski  
Igor Kaefer  
Lutz Kaelber  
Shawn Kaeppler  
Sven Kaese  
Michael Kaess  
Mirjam Kaestli  
Ivo Kaethner  
David Kaetzl  
Jaranit Kaewkungwal  
Wafaa Kaf  
Tina Kaffenberger  
Uzi Kafkafi  
Bjorn Kafsack  
Jonathan Kagan  
Masaharu Kagawa  
Azusa Kage  
Ashraf Kagee  
Shinichi Kageyama  
Lucila Kagohara Elias  
Hassan Kahal  
Daniel Kahan  
Alon Kahana  
Chaim Kahana  
Eva Kahana  
Shoshana Kahana  
Gila Kahila Bar-Gal  
Barbara Kahl  
J. Michelle Kahlenberg  
Charlene Kahler  
Ulf Kahlert  
Sonja Kahlmeier  
Andrew Kahn  
C. Ronald Kahn  
James Kahn  
Matthew Kahn  
Shulamit Kahn  
Lyn Sue Kahng  
Danny Ka-Ho Wong  
Alem Kahsai  
Hirofumi Kai

Hisashi Kai  
Angela Kaida  
Toshimi Kaido  
Georgia Kaidonis  
Darnell Kaigler  
Ishpinder Kailey  
Kevin Kain  
B. Kaina  
Bernd Kaina  
Hans Kainz  
Martin Kainz  
Philipp Kainz  
Benny Kaipparattu  
Armin Kaiser  
Daniel Kaiser  
Jerome Kaiser  
Jochen Kaiser  
Kathryn Kaiser  
Lucia Kaiser  
Maria Kaiser  
Peter Kaiser  
Raphaela Kaisler  
Pekka Kaitaniemi  
Eloise Kaizar  
Murali Kaja  
Olli Kajander  
Andrey Kajava  
Aiko Kaji  
Hideko Kaji  
Hiroshi Kaji  
Izumi Kaji  
Kazuaki Kajimoto  
Yukie Kajita  
Mikihito Kajiya  
Robert Kajobe  
Adriana Kajon  
Lukasz Kajtoch  
Evdoxia Kakani  
Sham Kakar  
Kazuhiro Kakimi  
Yoshihiko Kakinuma  
Masako Kakizaki  
Mayumi Kako  
Masao Kakoki  
Shaka Kaku  
Ritsuko Kakuma  
Madhavi Kakumanu  
Hiroki Kakuta  
Yoshimitsu Kakuta  
Chandra Prakash Kala  
Tamas Kalai

Evangelos Kalaitzakis  
Amanda Kalamar  
Theodoros Kalampokas  
Spyros Kalams  
Mohammad Ali Kalantar Motamedi  
Mohsen Kalantari  
Sundeep Kalantry  
Raj Kalaria  
Siripen Kalayanarooj  
Sita Kalayanarooj  
Miriam Kalbitz  
Matina Kalcounis-Rueppell  
Lee Kalcsits  
Sandip Kale  
Amy Kaleita  
Fatch Kalembo  
Smilja Kalenic  
Dimitri Kalenitchenko  
Tobias Kalenscher  
Gonul Kaletunc  
Sameer Kalghatgi  
Satish Kalhan  
Amy Kalia  
Manjula Kalia  
Sufiyan Kalikan  
Kyriaki Kalimeri  
Hannu Kalimo  
Shirin Kalimuddin  
Pawel Kalinski  
Karen Kalinyak  
Jennifer Kalish  
Marcia Kalish  
Katarzyna Kalita  
Grigorios Kalivas  
Peter Kalivas  
Thangavelu Kaliyappan  
Susana Kalko  
Dheeraj Kalladka  
Bhaskar Kallakury  
Avyakta Kallam  
Michael Kallen  
Michael Kaller  
Kimberly Kalli  
Asha Kallianpur  
A.S. Kallimanis  
Athanasios S. Kallimanis  
Tuomo Kalliokoski  
Maija-Liisa Kalliomaäki  
Tuula Kallunki  
Eric R. Kallwitz  
I.D. Kalmar

Jayne Kalmar  
Uldis Kalnenieks  
Emily Kalnicky  
Zoltan Kalo  
Eleftheria Kalogera  
Stefanos Kalogirou  
Ameeta Kalokhe  
Lukáš Kalous  
Oliver Kalpak  
Evanthia Kalpazidou Schmidt  
Bhawna Kalra  
Pramila Kalra  
Sanjay Kalra  
Alon Kalron  
Sukhvinder Kalsi-Ryan  
Anna Kaltenboeck  
Guruprasad Kalthur  
Heino R. Kaltiala  
Nishan Kalupahana  
Peter Kalvass  
Ramki Kalyanaraman  
Ramaswamy Kalyanasundaram  
Joan Kalyango  
Robert Kalyesubula  
Umut Kalyoncu  
Marco Kalz  
Jason Kam  
Tae-In Kam  
Yusuke Kamachi  
Kyoussuke Kamada  
Masamitsu Kamada  
Nobuhiko Kamada  
A. Kamal  
Ritul Kamal  
Manoj Kamalanathan  
Fahimeh Kamali  
Balu Kamaraj  
Thomas Kamarck  
Venu Kamarthapu  
Rujvi Kamat  
Hideaki Kamata  
Veena Kamath  
Beena Kamath-Rayne  
Edwin Kamau  
Mary Kamb  
Avinash Kambadakone  
Rukundo Kambarami  
Devaiah Kambiranda  
Pravin Kamble  
Mini Kamboj  
Sumalee Kamchonwongpaisan

Hideto Kameda  
Jun Kamei  
Mohamed Gomaa Kamel  
Mohammad Kamely  
Alexey Kamenskiy  
Takaharu Kameoka  
Maarten Kamermans  
Masaki Kameyama  
Hidehiro Kamezaki  
Kei Kamide  
Naoto Kamide  
Taro Kamigaki  
Keita Kamijo  
Astuko Kamijo-Ikemori  
Shinji Kamimura  
Alexandra Kamins  
Bozena Kaminska  
Karol Kaminski  
Susan Kaminskyj  
Toshinori Kamisako  
Kubra Kamisoglu  
Akihide Kamiya  
Takehiro Kamiya  
Yusuke Kamiya  
Yuusuke Kamiyoshihara  
Madhu Kamle  
Jan Kamler  
Meena Kamlesh  
Christina Kamma-Lorger  
Thomas Kammer  
Christian Kammerer  
Jody Kamminga  
Masashi Kamo  
Marcel Kamp  
Olle Kämpe  
Gueneter Kampf  
Thomas Kampf  
Carlijn Kamphuis  
George Kampis  
Ulla Kampmann  
Jan. A.A.M. Kamps  
Thomas Kamradt  
Ruth Kamrowski  
Collins Kamunde  
Daniel Kamykowski  
Chi-Chuan Kan  
Kees-Jan Kan  
Tao Kan  
Bavesh Kana  
Motoi Kanagawa  
Nobuhisa Kanahara

M. Kanai  
Ioannis Kanakis  
M. Kanakis  
Jill Kanaley  
Keiko Kanamori  
Keizo Kanasaki  
Rushed Kanawati  
Gen Kanaya  
Gen Kanayama  
Motoyori Kanazawa  
Rajashekhar Kanchanapally  
Vijaya Kancherla  
Tatsuo Kanda  
Teru Kanda  
Tomonori Kanda  
Yoshinobu Kanda  
Matheswaran Kandasamy  
Yoga Kandasamy  
Abraham Kandathil  
Eugene Kandel  
Rita Kandel  
Sunil Kandel  
Farid Kandil  
Raju Kandimalla  
Ramesh Kandimalla  
Anne Kandler  
Akihiko Kandori  
Eeshani Kandpal  
Adam Kane  
Daniel Kane  
Jennifer Kane  
Jeremy Kane  
Joanne Kane  
Olivia Kane  
Robert Kane  
Sarah Kane  
Yasuhiro Kaneda  
Kazue Kanehara  
Akira Kaneko  
Shuji Kaneko  
Yoshikatsu Kaneko  
Yuji Kaneko  
Yuko Kaneko  
Angelos Kanellis  
Kenneth Kaneshiro  
Bum-Yong Kang  
Byoung-Cheorl Kang  
Byung-Ho Kang  
Changwon Kang  
ChulHee Kang  
Chunying Kang

CongBao Kang  
Dae-Kyung Kang  
Dongchon Kang  
Gagandeep Kang  
Gyeong Hoon Kang  
Hakmook Kang  
Hojeong Kang  
Hwan-Goo Kang  
Hyunseung Kang  
Insoo Kang  
Jian Kang  
Jihee Lee Kang  
Jing X. Kang  
Jin-Ho Kang  
Jong-Sun Kang  
Kai Kang  
Keon Wook Kang  
Kristopher Kang  
Kyu-Suk Kang  
Lin Kang  
Min Kang  
Minchul Kang  
Minglei Kang  
Pauline Kang  
Sanghee Kang  
Sang-Hee Kang  
Sanghoon Kang  
Se Woong Kang  
Seungbum Kang  
Seungha Kang  
Sun Kang  
Sung Wook Kang  
Wanmo Kang  
Wonku Kang  
Wonseok Kang  
Xiang Kang  
Yanyong Kang  
Yuan Yuan Kang  
Yubin Kang  
Yuejun Kang  
Yun Kang  
Yunhee Kang  
Zhensheng Kang  
Artur Kania  
Gabriela Kania  
Stephen Kania  
Urša Kanjir  
Phyllis Kanki  
Yasuharu Kanki  
Georgette Kanmogne  
Oliver Kann

Meganathan Kannan  
Nagarajan Kannan  
Ram Kannan  
Srinivasaraghavan Kannan  
T.R. Kannan  
Ramaswamy Kannappan  
Stephen Kanne  
Kasturi Kanniah  
Juho Kanniainen  
Yoshihiko Kannno  
Sridhar Kannurpatti  
Flora Kano  
Fumihiro Kano  
Yasunori Kano  
Michael Kanost  
Anuraag Kansal  
Sandip Kanse  
Alpdogan Kantarci  
Anu Kantele  
Julie Kanter  
Thomas Kantermann  
Steve Kanters  
Sree Kanthaswamy  
Jimut Kanti Ghosh  
John Kantner  
Tatsuya Kanto  
Shawn Kantor  
Yashpal Kanwar  
Mufaro Kanyangarara  
Go Kanzaki  
Hiroyuki Kanzaki  
C. Cheng Kao  
Cheng-Fu Kao  
Hao-Yun Kao  
Jill Kao  
Peter Kao  
Rowland Kao  
T.C. Kao  
Tze-Wah Kao  
Wei-Yu Kao  
Wen-Yuan Kao  
Winston Kao  
Yi-Hsuan Kao  
Suray Kapa  
Bhaveen Kapadia  
Dharmi Kapadia  
Bryan Kapella  
Adam Kapelner  
Maria Kapetanaki  
Panagiotis Kapetas  
Vikram Kapila

Michael Kapiloff  
Daniel Kaplan  
David Kaplan  
Gilaad Kaplan  
Isaac Kaplan  
Mark Kaplan  
Ozgur Kaplan  
Robert C Kaplan  
Warren Kaplan  
Socrates Kaplanis  
Alya Kapley  
Nicholas Kaplinsky  
Kevin Kaplowitz  
Anil Kapoor  
Rupa Kapoor  
Vaishali Kapoor  
Andras Kaposi  
Vijaya Kappala  
L.J. Kappelle  
János Kappelmayer.  
Charles Kappenstein  
Astrid Kappers  
Mattes Kappert  
Matt Kappes  
Efstathia Kapsogeorgou  
Ted Kaptchuk  
Stephen Kaptoge  
Martin Kapun  
Gaurav Kapur  
Navin Kapur  
Reuben Kapur  
Aurélie Kapusta  
Nestor Kapusta  
Pawel Kapusta  
Sandip Kar  
Firat Kara  
Murat Karabatak  
Turan Karaca  
Bilge Karacali  
Niki Karachaliou  
Spyros Karadimas  
Levente Karaffa  
Apostolos Karagiannis  
Jim Karagiannis  
Tom Karagiannis  
Julia Karagicheva  
Domna Karagogeos  
Nabil Karah  
Mahir Karakas  
Ioannis Karakikes  
Giorgos Karakousis

Gokhan Karakulah  
Firdes Saadet Karakulak  
Ahmed Karam  
Azza Karam  
Yannis Karamanos  
Rallis Karamichalis  
Sofia Karamintziou  
Panagiotis Karampournotis  
Belgin Karan  
Ratna Karan  
Victor Karandashev  
Paul Karanicolas  
Styliani Karanika  
Marina Karanikolos  
Panagiotis Karanis  
Ivana Karanovic  
Santhosh Karanth  
Christos Karapiperis  
Georgios Kararigas  
Alicia Karas  
Lana Karasik  
William Karasov  
Ece Karatan  
Iliia Karatsoreos  
Georgios Karavas  
Kamilu Karaye  
Hamid Reza Karbalaei-Heidari  
Musturay Karcaaltincaba  
Celeste Karch  
François Karch  
Suzan Kardong-Edgren  
Marty Kardos  
Joseph Kardouni  
Isabella Kardys  
Hassen Kared  
David Kareken  
Stephen Karesh  
Rolf Karez  
Mehdi Kargar  
Fatemeh Kargarfard  
Axel Karger  
Andrei Karginov  
Joanna Kargul  
John Karijolic  
Rashed Karim  
Zubair Karim  
Ehsan Karimi  
Hamid Reza Karimi  
Mahdi Karimi  
Mansour Karimi  
Parisa Karimi

Morteza Karimipoor  
Anastasia Karioti  
Samuel Kariuki  
Symon Kariuki  
Rupesh Kariyat  
Juha Karjalainen  
Abhilasha Karkey  
Subhas Karki  
Antti Karkman  
Anna Kärkönen  
Heidrun Karlic  
Apostolos Karligkiotis  
Joel Karliner  
Kinga Karlinger  
Eric Karlins  
Gennady Karlov  
Trine Karlsen  
Brynjar Karlsson  
Erik Karlsson  
Fredrik Karlsson  
Laila Karlsson  
Oskar Karlsson  
Marcus Karlstetter  
Rolf Karlstrom  
Faisal Karmali  
Amol Karmarkar  
Wilfried Karmaus  
Konstantinos Karmiris  
Christof Karmonik  
Dimitrios Karpaliotis  
Tuomas Karna  
Anupama Karnam  
Robert J. Karnes  
Sasha Karnes  
Daniel Karney  
Rahul Karnik  
A.E. Karnoub  
Nina Karnovsky  
Piotr Karolewski  
Dwi Setyowati Karolina  
György Károlyi  
Nitsara Karoonuthaisiri  
Evgenia Karousou  
Jordan Karp  
Sarah Karpanty  
Adam Karpf  
Andrew Karplus  
P. Karplus  
Dimitrios Karpouzas  
Aisté Karpušenkaitė  
Nancy Karraker

Locke KARRIER  
Maile KARRIS  
Istvan KARSAI  
Marton KARSAI  
Stephanie KARST  
Sven KARSTENS  
Balasubramanian KARTHICK  
Mikko KARTTUNEN  
Tyler KARTZINEL  
S. KARUMANCHI  
Sheela KARUNANITHI  
Indrani KARUNASAGAR  
Senthilkumar KARUPPAGOUNDER  
Jaishankar KARUPPANNAN  
Shunmugiah KARUTHA PANDIAN  
Shilpa KARVANDE  
Jacek KARWOWSKI  
Maciek KARWOWSKI  
Kenny KARYADI  
Anastasios KARYDIS  
Hideko KASAHARA  
Kota KASAHARA  
Kiyoto KASAI  
Parastu KASAIE  
Tsuyoshi KASAMA  
Devan KASANGARA  
Annemarie KÄSBOHRER  
Daniel KASCHEK  
Elena KASCHINA  
Kristin KASCHNER  
Ahmed KASEB  
Sabine KASEL  
Moses KASEMBELI  
Benjamin KASENDA  
Thomas KASH  
David KASHATUS  
Nasim KASHEF  
Hideaki KASHIMA  
Shinichiro KASHIWAGI  
Ali KASHKOULI  
Rajpal KASHYAP  
Anna KASIELSKA-TROJAN  
Ramanathan KASIMANICKAM  
Sabine KASIMIR-BAUER  
Balakuntalam KASINATH  
Poothapillai KASINATHAN  
Andrea KASINSKI  
Konstantinos KASIOUIS  
Yakup KASKA  
Frederick KASKEL  
Manish KASLIWAL

Enkelejda KASNECI  
Bernd KASPER  
Dennis KASPER  
Erich KASPER  
Fred KASPER  
Michael KASPER  
Susan KASPER  
Gregor KASPRIAN  
Miroslaw KASPRZAK  
Daniel KASS  
Robert KASS  
MuluaLEM KASSA  
Amir KASSAM  
Charles KASSARDJIAN  
Victor KASSEY  
Alexei KASSIAN  
Stavros KASSINOS  
Radwan KASSIR  
Zamaneh KASSIRI  
Mika KASTARINEN  
Mary Jo KASTEN  
Gerald KASTING  
Irida KASTRATI  
Panagiotis KASTRITIS  
Jens KASTRUP  
Sudhir KASTURI  
Jun KASUGA  
Shoko KASUGA  
Michael KASUMOVIC  
Beata KASZTELAN-SZCZERBINSKA  
Anna KATA  
Takenobu KATAGIRI  
Toyomasa KATAGIRI  
Prasad KATAKAM  
Yoshinori KATAKURA  
Ramesh KATAM  
Martijn KATAN  
Hiroyuki KATANO  
Toshiya KATANO  
H. KATAOKA  
Ranjit KATARIA  
Naoki KATASE  
Kan KATAYAMA  
Tsutomu KATAYAMA  
Lorig KATE  
Rohit KATE  
Fredrick KATEERA  
Koutra KATERINA  
Wendy KATES  
Pantelis KATHARIOS  
Luciana KATIKI

Kishore Katikireddy  
L. Katirayi  
Akihiko Kato  
Fumi Kato  
Gregory Kato  
Hisanori Kato  
Ikuma Kato  
Juntaro Kato  
Kazuhisa Kato  
Kikuya Kato  
Koichi Kato  
Makoto Kato  
Masaru Kato  
Massuo Kato  
Mitsuo Kato  
Naoki Kato  
Nobuhiro Kato  
Noriko Kato  
Ryuji Kato  
Satoshi Kato  
Shigeaki Kato  
Takamitsu Kato  
Takehide Kato  
Yasumasa Kato  
Kiran Katoch  
Akira Katoh  
Hironori Katoh  
Kazutaka Katoh  
Ioannis Katramados  
Guy Katriel  
Lee Kats  
Emmanuel Katsanis  
Konstantinos Katsanos  
Olga Katsarou  
Pavel Katsel  
Panagiotis Katsonis  
Konstantinos Katsoulis  
Antonios Katsounas  
Sugie Katsuji  
Toshio Katsukawa  
Hiroshi Katsuki  
Yukako Katsura  
Shutaro Katsurabayashi  
Tomohiro Katsuya  
Ramesh Katta  
Daniel Kattnig  
Karen Katula  
Abram Katz  
David Katz  
Joanne Katz  
Keziah Katz

Lee Katz  
Lisa Katz  
Matthew Katz  
Richard Katz  
Sharyn Katz  
William Katz  
Hans Katzberg  
Mary Katzenberg  
Marco Katzenberger  
David Katzenstein  
Helmut Katzgraber  
Gadi Katzir  
Philip Katzman  
Wendy Katzman  
Hannah Katznelson  
Laurence Katznelson  
Todd Katzner  
Benedikt Kaufer  
Norbert F. Käufer  
Mathias Kauff  
Gilles Kauffenstein  
Louis Kauffman  
Elizabeth Kaufman  
Jason Kaufman  
Jim Kaufman  
Laura Kaufman  
Lloyd Kaufman  
Miriam Kaufman  
Pamela Kaufman  
Erica Kaufman West  
Christopher Kaufmann  
Rainer Kaufmann  
Abhishek Kaul  
Rashmi Kaul  
Sanjana Kaul  
Barbara Kaup  
Anu Kauppinen  
Gunveen Kaur  
Gurcharan Kaur  
Indu Pal Kaur  
Jasbir Kaur  
Jaspreet Kaur  
Kamaljit Kaur  
Rupinderjeet Kaur  
Sukhbir Kaur  
Sukhwinder Kaur  
Antti Kause  
Gagan Kaushal  
Gur Kaushal  
Manoj Kaushal  
Navin Kaushal

Charu Kaushic  
Azad Kaushik  
Sadasivam Kaushik  
Markus Kautz  
John Kavanagh  
Justin Kavanagh  
Phillip Kavanagh  
Musa Kavas  
Gitit Kave  
P. Kavi Kishor  
Amol Kavishwar  
Zahra Kavosi  
Panos Kavvadas  
Hiroyoshi Kawaai  
Saneyuki Kawabata  
Shun-ichiro Kawabata  
Y. Kawabata  
Kentaro Kawabe  
Soichiro Kawabe  
Yousuke Kawachi  
Norifumi Kawada  
Yasushi Kawaguchi  
Genri Kawahara  
Manabu Kawahara  
Tetsuya Kawahara  
Yutaka Kawahito  
Gota Kawai  
Kenichiro Kawai  
Masanobu Kawai  
Motofumi Kawai  
Koji Kawakami  
Toshiaki Kawakami  
Yasuhiko Kawakami  
Yutaka Kawakami  
Tetsuya Kawakita  
Agata Kawalec  
Shweta Bagewadi Kawalia  
Hiroaki Kawamichi  
Elisa Kawamoto  
Ryuichi Kawamoto  
Shinya Kawamoto  
Akane Kawamura  
Kazuhiro Kawamura  
Kouichi Kawamura  
Hideki Kawanishi  
Kenji Kawano  
Ryo Kawasaki  
Tomoyuki Kawase  
Koichiro Kawashima  
Masahiro Kawashima  
Motoko Kawashima

Suguru Kawato  
Satoko Kawauchi  
Takeshi Kawauchi  
Thomas Kawula  
Alan Kay  
Anthony Kay  
Mathew Kay  
Robert Kay  
Ali Kaya  
Yalcin Kaya  
Ziya Kaya  
Huseyin Kayadibi  
Mohsen Kayal  
Ghazi Kayali  
Kou Kayamori  
Elizabeth Kaye  
Thomas Kaye  
Patrick Kayembe  
Kassoum Kayentao  
Herbert Kayiga  
James Kayima  
David Kaylie  
Harvey Kayman  
George Kaysen  
Bengt Kayser  
Gian Kayser  
Leonard Kaysser  
Reem Kayyali  
Lawrence Kazak  
Hokto Kazama  
Junichiro Kazama  
Kemal Kazan  
Rumeyza Kazancioglu  
Ilias Kazanis  
Zeinab Kazemi  
Yukinori Kazeto  
Andrius Kazlauskas  
Victoria Kazmerski  
Nabila Kazmi  
Clarice Kazue Fujihara  
Toshinobu Kazui  
Santosh KC  
Hengning Ke  
Jiyuan Ke  
Po-Ju Ke  
Ruian Ke  
Ruimin Ke  
Wenshan Ke  
Yang Ke  
Yi-Ni Ke  
Sarah Keadle

Paul Keall  
Jacob Kean  
Brian Keane  
Joseph Keane  
Graham Kearn  
David Kearney  
Jennifer Kearney  
Mary Kearney  
Robert Kearney  
Russell Keast  
Rebekah Keating  
Sheila Keating  
Shelley Keating  
Emily Keats  
Lisa Keay  
David Keays  
Bereket Kebede  
Melkam Kebede  
Moritz Kepschull  
Defne Kecik  
Noemi Kedei  
Nancy Kedersha  
Sasko Kedev  
Haji Kedir  
Ureporn Kedjarune-Leggat  
Ross Kedl  
Kwong-Ming Kee  
Younghoon Kee  
Edward Keedwell  
Lucas Keefer  
Kevin Keegan  
Kim Kee-Hong  
Christoph Keel  
Brandon Keele  
Annika Keeley  
Jon Keeley  
Thomas Keeley  
Linda Keeling  
Stephen Keely  
Olya Keen  
Phillip Keen  
Melody Keena  
Daniel Keenan  
Jacqueline Keenan  
Katherine Keenan  
Tiarnan Keenan  
Douglas Keene  
Malcolm Keeping  
Richard Keers  
Daniel Keeser  
Mark Keezer

Sarah Kefayati  
Angie Kehagia  
Alexander Kehl  
Thomas Kehl-Fie  
Corinna Kehrenberg  
Uri Keich  
Bart Keijser  
Deborah Keil  
Guenther Keil  
Kimberly Keil  
Thomas Keil  
Kenneth Keiler  
Ashley Keiser  
Olivia Keiser  
Julie Keister  
Lisa Keister  
Akilah Keita  
Douglas Keith  
Jonathan Keith  
Scott Keith  
Anouk Keizer  
Peter Kekenens-Huskey  
Mari Kekkonen  
Ramesh Kekunnaya  
Brendan Kelaher  
Uddhav Kelavkar  
Saskia Kelders  
Henrich Kele  
Theodoros Kelesidis  
Roya Kelishadi  
Barbara Kellam  
Sebastian Kelle  
Colin Kelleher  
Kelly Kelleher  
Alexandre Keller  
Amy Keller  
Barbara Keller  
Bettina Keller  
Evan Keller  
Kate Keller  
Klaus Keller  
Kristin Keller  
Maria Keller  
Matthieu Keller  
Roberta L. Keller  
Simona Keller  
Susanna Keller  
Troy Keller  
Ulrich Keller  
Walter Keller  
Maureen Keller-Wood

Jeff Kelleway  
Colleen Kelley  
Darshan Kelley  
David Kelley  
Eric Kelley  
George Kelley  
Joanna Kelley  
Mark Kelley  
Matthew Kelley  
Stephen Kelley  
Stuart Kellie  
Christian Kellner  
Kenneth Kellner  
Michael Kellner  
Joshua Kellogg  
John Kellum  
Anita Kelly  
Brian Kelly  
Charles Kelly  
Christine Kelly  
Clint Kelly  
Daniel Kelly  
Dominic Kelly  
Emer Kelly  
J. Kelly  
James D. Kelly  
Jeremiah Kelly  
John Kelly  
Krista Kelly  
Pat Kelly  
Paul Kelly  
Robert Kelly  
Ryan Kelly  
Steven Kelly  
Malte Kelm  
Karl Kelsey  
Katharine Kelsey  
J.A. Scott Kelso  
Terhi Keltanen  
David Kelton  
Damian Kelty-Stephen  
George Kemenes  
Lajos Kemeny  
Martin Kemler  
Markus Kemmelmeier  
Andre Kemmling  
Joseph Kemnitz  
Darrell Kemp  
Elizabeth Kemp  
G. Kemp  
John Kemp

Kevin Kemp  
Björn Kemper  
Hervé Kempf  
Marie Kempf  
Stefan Kempf  
Tibor Kempf  
Robert Kemppainen  
Vivek Kempraj  
Wolfe Ken  
Shifra Ken Dror  
Eben Kenah  
Christopher Kenaley  
Carl Kendall  
Matt Kendall  
William Kendall  
Pinar Kendigelen  
Tetyana Kendzerska  
István Kenessey  
Dror Kenett  
Yoed Kenett  
Shian-Ling Keng  
Andre Kengne  
Paul-Ariel Kenigsberg  
Andrew Keniry  
Marc Kenis  
Richard Kennaway  
Ashley Kennedy  
Breandán Kennedy  
Brian Kennedy  
Briana Kennedy  
Cassie Kennedy  
Chinaro Kennedy  
David Kennedy  
Emma Kennedy  
Lindsey Kennedy  
Lorna Kennedy  
Malcolm Kennedy  
Michael Kennedy  
Nicholas Kennedy  
Sheela Kennedy  
Tay Kennedy  
William Kennedy  
Pierre Kennepohl  
John Kenneth  
Erica Kenney  
Joanie Kenney  
Larry Kenney  
M. Kenney  
Scott Kenney  
William Kenney  
Jason Kennington

David Kenny  
Glen Kenny  
Rose Anne Kenny  
Tsuyoshi Kenri  
Paul Kenrick  
Ronald Kensinger  
Angius Kent  
Christopher Kent  
David Kent  
Erin Kent  
L. Kent  
Michael Kent  
Shia Kent  
Tara Kent  
William Kent  
Alexander Kentikelenis  
Amanda Kentner  
Alex Kentsis  
Tuomas Kentta  
Ben Kenward  
Nicholas Kenyon  
Justin Keogh  
Sven Kepes  
George Kephart  
Olga Kepinska  
Thomas Kepler  
Gunnar Keppel  
Brian Keppler  
Daniel Keppler  
Georgia Keramida  
Roxanne Kerani  
Robert Kerbel  
Stefan Kerber  
Robert Kerby  
Garry Kerch  
Carole Kerdelhue  
Saadia Kerdine-Romer  
Halima Kerdjoudj  
John Kerekes  
Nir Keren  
Gael Kergoat  
Micheline Kergoat  
Hugo Kerhervé  
Ruth Keri  
Sam Kerk  
Annette Kerkhoff  
Johan Kerkhofs  
Jens Kerl  
Ali Kermanizadeh  
Stephanie Kermorgant  
Florian Kern

Peggy Kern  
Petra Kern  
Timothy S Kern  
Winfried Kern  
Walter Kernan  
Berit Kerner  
Steven Kernie  
J. Kero  
Andrew Kerr  
Bethany Kerr  
Ian Kerr  
Peter Kerr  
Rachel Kerr  
Ian Kerridge  
Steven Kerrigan  
Julia Kerschbaum  
Erin Kershaw  
Arik Kershenbaum  
Alan Kersten  
Phil Kersten  
Sander Kersten  
Anette Kersting  
Uwe Kersting  
Wilhelmina Kerstjens-Frederikse  
Janos Kertesz  
Attila Kertesz-Farkas  
Aparna Kesarwala  
Lakshmya Kesavalu  
James Kesby  
Ali Keshavarzian  
Shashank Keshavmurthy  
Abbas Keshtkar  
Mahtab Keshvari  
Dilek Keskin  
Emre Keskin  
Stefan Keslacy  
Shelli Kesler  
Recep Kesli  
Can Kesmir  
Sarah Kessans  
David Kessel  
Dominique Kessel  
Line Kessel  
Benedikt Kessler  
Danny Kessler  
Felix Kessler  
Ian Kessler  
Michael Kessler  
Thomas Kessler  
V.G. Kessler  
Yoav Kessler

Thomas Kesteman  
Luc Kestens  
Martin Keszler  
Kirsi Ketola  
Markus Ketteler  
Johannes Kettunen  
James Ketudat Cairns  
Young-Sam Keum  
Philipp Keune  
Els Keunen  
Michaela Keuper  
Helmut Keupp  
Zela Keuylian  
Peter Kevan  
Christopher Kevil  
Felix Key  
Nigel Key  
Anthony Keyburn  
Nemat Keyhani  
Yoav Keynan  
Khandan Keyomarsi  
Ulrich Keyser  
M.A. Keyzer  
Dineo Khabele  
Jyoti Khadka  
Maksim Khadkevich  
Moncef Khairallah  
Md. Zain Khaironizam  
Alka Khaitan  
Subhas Khajanchi  
Razieh Khajehkazemi  
Salim Khakoo  
Farid Khalafalla  
Annette Khaled  
Olfa Khalfallah  
Syma Khalid  
Michael Khalil  
Mohd Ibrahim Khalil  
Mostafa Khalil  
Davood Khalili  
Hamed Khalili  
Kamel Khalili  
Amir Khaliq  
J. Khalsa  
Bavornlak Khamnamtong  
Abdul Khan  
Abdur Khan  
Ajmal Khan  
Ali Khan  
Amir Khan  
Arif Khan

Arshad Khan  
Asis Khan  
Faisal Khan  
Hafiz Khan  
Haseeb Khan  
Ilyas Khan  
Imdad Khan  
Imran Khan  
Izhar Khan  
Khalid Khan  
M. Asim Khan  
Matiullah Khan  
Md Gulam Khan  
Meraj Khan  
Mobarak Khan  
Mohsin Khan  
Muhammad Altaf Khan  
Mushfiquddin Khan  
Nadeem Khan  
Naveed Khan  
Nilofar Khan  
Nooruddin Khan  
R.J. Khan  
Rashid Khan  
Razib Khan  
Rizwan Khan  
Sameer Khan  
Sardar Khan  
Seema Khan  
Shahid Khan  
Sheema Khan  
Suleman Khan  
Tahir Khan  
Umar Khan  
Waqas Khan  
Wasif Khan  
Wasim Khan  
Wazir Zada Khan  
Yusuf Khan  
Rasheda Khanam  
Hashem Khanbabaei  
Lidita Khandeparker  
Ashutosh Khandha  
Ashish Khanna  
Ashwani Khanna  
Sahil Khanna  
Savita Khanna  
Tarun Khanna  
Rizwana Khanum  
Neelam Khaper  
Michael Kharas

Jenan Kharbush  
Sharad Khare  
Ritu Kharer  
Akram Kharroubi  
Samer Kharroubi  
Vyacheslav Kharuk  
Ali Khashan  
Khaled Khatab  
Camilo Khatchikian  
Hasan Khatib  
Mehar Khatkar  
Hafeeza Khatoon  
Bhavin Khatri  
Resham Khatri  
Vishal Khatri  
Yogan Khatri  
Sunil Khattar  
Anthony Khawaja  
Mourad Khayati  
Meleckidzedeck Khayesi  
Y. Khaykin  
Yasser Khazaal  
Maryam Khazaee-Pool  
Habib Khazaie  
Mazen Kheirbek  
Valid Kheirollahi  
Robinder Khemani  
Ajay Kher  
Amit Khera  
Reetika Khera  
Amir Kheradmand  
Saeed Reza Kheradpisheh  
Salman Khetani  
Sumeet Khetarpal  
C.L. Khetrupal  
Vitaly Kheyfets  
Hossein Khiabanian  
Aurelie Khimoun  
Michelle Kho  
Fariba Khodaghali  
Ahmad Khodayari Rostamabad  
Anwar Khoirul  
Samannaaz Khoja  
Bee Ee Khoo  
Edmund Khoo  
Joan Khoo  
Lip Khoon Kho  
Alok Khorana  
Yasamin Khorramzadeh  
Sabra Khorsand Ahmadi  
Alexander Khoruts

Celso Khosa  
Habibeh Khoshbouei  
Sohail Khoshnevis  
Samaneh Khoshrou  
Nidhi Khosla  
Ali Reza Khosravi  
Pegah Khosravi  
Christine Khosropour  
David Khoury  
Noura Khoury  
Thaer Khoury  
Konstantin Khrapko  
Andrei Khrennikov  
Sadik Khuder  
Nonhlanhla Khumalo  
Surapan Khunamornpong  
Syed Khundmiri  
Navadon Khunlertgit  
Dhanachandra Khuraijam  
Ashwani Khurana  
Satish Khurana  
Tejvir Khurana  
Anzar Khuroo  
Kiran Khush  
Sieu Khuu  
Arif Khwaja  
Jong Ki  
Sung Hwan Ki  
Jean-Fu Kiang  
Richard Kiang  
Mohammad Kiani  
Nima Kianoush  
Suda Kiatkamjornwong  
Melina Kibbe  
Frederick Kibenge  
Alex Kibitov  
Muhammad Kibriya  
Emre Kiciman  
Philipp Kickingereder  
Kozui Kida  
Kenneth Kidd  
Linda Kidd  
Martin Kidd  
Thomas Kidd  
Steven Kiddle  
Rachel Kidman  
Yasutoshi Kido  
Thomas Kieber-Emmons  
Ursula Kiechl-Kohlendorfer  
Christiane Kiefer  
Florian Kiefer

Todd Kiefer  
Pawel Kiela  
Jennifer Kielczewski  
I.N. Kieler  
Jan Kielstein  
Patrick Kiely  
Lambertus Kiemeneey  
Petra Kienesberger  
Ellen Kienzle  
Michael Kienzler  
Ann Kier  
Justyna Kierat  
Amy Kiernan  
Jeffrey Kiernan  
Bernd Kieseier  
Aaron Kiess  
Rogier Kievit  
Peter Kiffney  
Godfrey Kigozi  
N.G. Kigozi  
Juliet Kiguli  
Takanori Kihara  
John Kihlstrom  
Lars Kihm  
Gustavo Kijak  
Gregor Kijanka  
Takahiro Kikawada  
Don Kikkawa  
Lisette Kikkert  
Rainer Kiko  
Colin Kikuchi  
Eiji Kikuchi  
Haruhito Kikuchi  
Jun Kikuchi  
Mitsuru Kikuchi  
Naoki Kikuchi  
Ryosuke Kikuchi  
Taisei Kikuchi  
Yoshitomo Kikuchi  
Takashi Kikukawa  
Takefumi Kikusui  
Mariana Kikuti  
Hiroe Kikuzaki  
Raouf Kilada  
Sreenivasulu Kilari  
Angela Kilb  
John Kilbane  
Cherry Kilbride  
Kelly Kilburn  
Liam Kilduff  
Sean Kiley

Alixé Kilgour  
Stephen Kilianski  
Ayse Kilic  
Mustafa Kilickap  
Anthony Killard  
Shaun Killen  
Kristina Killgrove  
Timothy Killingback  
Nabil Killiny  
Elizabeth Killion  
Rebecca Kilner  
A. Kilpatrick  
Michelle Kilpatrick  
Charlotte Kilstrup-Nielsen  
Konstantina Kilteni  
Anne Kiltie  
Uta Kiltz  
Anthony Kim  
Beom Kyung Kim  
Beomsoo Kim  
Bo Hyun Kim  
Bong-Wan Kim  
Brian Kim  
Bum Jung Kim  
Byeong Kim  
Byoungsoo Kim  
Byung-Seok Kim  
Changhoon Kim  
Changsun Kim  
Cheol Sang Kim  
Cheol Soo Kim  
Christopher Kim  
Dae Woo Kim  
Daehyun Kim  
Daejin Kim  
Daniel Kim  
Deok Ryun Kim  
Do-Geun Kim  
Do-Gyoon Kim  
Dokyoon Kim  
Dong Joon Kim  
Dong Wook Kim  
Donghee Kim  
Dong-Hyun Kim  
Dong-Joo Kim  
Dong-Jun Kim  
Dong-Ki Kim  
Dong-Yun Kim  
Ella Kim  
Eui-Jin Kim  
Eun Ran Kim

Eunjoo Kim  
Eun-Kyoung Kim  
Francis Kim  
Gheun-Ho Kim  
H. Nina Kim  
Ha Won Kim  
Hae Won Kim  
Hak-Jae Kim  
Hang-Rae Kim  
Hangun Kim  
Hankyul Kim  
Hee Jin Kim  
Hee Taek Kim  
Heebal Kim  
Hee-Jin Kim  
Heejong Kim  
Hei Sung Kim  
Heui-Soo Kim  
Hocheol Kim  
Hong Joo Kim  
Hong-Jin Kim  
Hoon Kim  
Hunkyung Kim  
Hwa-Jung Kim  
Hwan Kim  
Hwi Young Kim  
Hye Young Kim  
Hye-Ji Kim  
Hyeon Ho Kim  
Hye-Sook Kim  
Hye-Sun Kim  
Hyeun Bum Kim  
Hyoung-Il Kim  
Hyoung-Ryoul Kim  
Hyoungsoo Kim  
Hyun Jin Kim  
Hyun Kyung Kim  
Hyun Soo Kim  
Hyunggee Kim  
Hyung-Seok Kim  
Hyunjee Kim  
Ilman Kim  
Il-Man Kim  
In Jung Kim  
Inki Kim  
J. Kim  
Jae Bum Kim  
Jae Heon Kim  
Jaeil Kim  
Jae-Jin Kim  
Jae-Sung Kim

Jangwon Kim  
Jeansok Kim  
Jee Hyun Kim  
Jenny Kim  
Jeong Do Kim  
Jeong Hun Kim  
Jeonga Kim  
Jeong-Min Kim  
Jeongyun Kim  
Ji Yeon Kim  
Jieun Kim  
Jihye Kim  
Jin Kim  
Jin Hyoung Kim  
Jin Il Kim  
Jin-Cheol Kim  
Jin-Hwan Kim  
Jinman Kim  
Jinny Kim  
Jinsoo Kim  
Jinwon Kim  
Jin-Wook Kim  
Jisoo Kim  
Ji-Won Kim  
Jiyeun Kate Kim  
Jong Seung Kim  
Jongbin Kim  
Jong-Ho Kim  
Jonghwa Kim  
Jonghwan Kim  
Jongoh Kim  
Jong-Shik Kim  
Joo Seung Kim  
Joohan Kim  
Joomyeong Kim  
Joon Mo Kim  
Joong Hee Kim  
Joonki Kim  
Ju Young Kim  
Jung-Ae Kim  
Jung-Hyun Kim  
Jungrack Kim  
Jungsu Kim  
Jung-whan Kim  
Kami Kim  
Kevin Kim  
Ki Woo Kim  
Ki-Jong Kim  
Kwang Seok Kim  
Kyong-Tai Kim  
Kyoung-Mee Kim

Kyoungmin Kim  
Kyoung-Nam Kim  
Kyu Kim  
Kyuhyung Kim  
Kyung Kim  
Kyung-Jin Kim  
Kyungmi Kim  
Leo Kim  
Maengjo Kim  
Manho Kim  
Mi Na Kim  
Min Hwan Kim  
Min Jung Kim  
Min Kyoung Kim  
Mina Kim  
Mi-Na Kim  
Minkyoung Kim  
Miran Kim  
Myeung Kim  
Myoung-Hwan Kim  
Myung-Hee Kim  
Nacksung Kim  
Nak-Kyeong Kim  
Nam Chul Kim  
Nam Keun Kim  
Nam Kyu Kim  
Namshin Kim  
Nayoung Kim  
Peter Kim  
Pilyoung Kim  
Rakhyun Kim  
Roger Kim  
Sangho Kim  
Sang-Ki Kim  
Sangwoo Kim  
SangYun Kim  
Se-Chan Kim  
Sejoong Kim  
Seok-Won Kim  
Seong Hwan Kim  
Seong-Gon Kim  
Seongho Kim  
Seong-Hyop Kim  
Seong-Jang Kim  
Seong-Jun Kim  
Seul Ki Kim  
Seungchan Kim  
Seung-Nam Kim  
Seung-Sep Kim  
Seungwon Kim  
Shin-Hee Kim

Simon Kim  
So Yeon Kim  
Sohye Kim  
Soo Wan Kim  
Sooah Kim  
Soochong Kim  
Suhyun Kim  
Suil Kim  
Sun Kim  
Sun Jung Kim  
Sunae Kim  
Sung Han Kim  
Sung Joon Kim  
Sung Woo Kim  
Sung-Hoon Kim  
Sung-Wan Kim  
Sungwon Kim  
Suwon Kim  
Tae Kim  
Tae Hoon Kim  
Tae Jin Kim  
Tae-Bum Kim  
Tae-Hyung Kim  
Tae-Woo Kim  
Tae-Yoon Kim  
Tania Kim  
W Kim  
W.K. Kim  
Weon Kim  
Won Kim  
Won Tae Kim  
Won-Il Kim  
Woo Ho Kim  
Woo Joo Kim  
Woo Taek Kim  
Wook Kim  
Y.J. Kim  
Yanghee Kim  
Yang-Hyun Kim  
Yeonjoo Kim  
Yong Bae Kim  
Yonggyun Kim  
Yong-Mi Kim  
Yoon-Young Kim  
You-Me Kim  
Young Bong Kim  
Young Tae Kim  
Young-Joon Kim  
Young-Kyun Kim  
Young-Mee Kim  
Yu Shin Kim

Peter Kima  
James Kimani  
Bruce Kimball  
Mark Kimberley  
Kristopher Kimbler  
Steven Kimbrough  
Young-In Kim-Hoehamer  
Ismael Aaron Kimirei  
Yoshifumi Kimizuka  
Bruce Kimler  
Marek Kimmel  
Joachim Kimmerle  
Eva Kimonis  
Sohei Kimoto  
Michelle Kimple  
Akihiro Kimura  
Hideki Kimura  
Hideo Kimura  
Hirokazu Kimura  
Hiroshi Kimura  
Kazuhiro Kimura  
Li Kimura  
Shunsuke Kimura  
Tadashi Kimura  
Takuma Kimura  
Tsuyoshi Kimura  
Yoko Kimura  
Yoshinobu Kimura  
Cindy Kin  
David Kinahan  
Robert Kinast  
Rebecca Kinaston  
Paul Kinchington  
Zsigmond Kincses  
Zsigmond Tamas Kincses  
Robert Kinders  
Detlef Kindgen-Milles  
Eveline Kindler  
Heinz Kindler  
Jochen Kindler  
Joseph Kindler  
Andrea Kindler-Röhrborn  
Mark Kindy  
Aaron King  
Annie King  
Bethia King  
Brett King  
Carina King  
Charlotte King  
Chih-Yen King  
Deborah King

Derek King  
Doug King  
Gregory King  
Jason King  
Jessica King  
Joshua King  
Kevin King  
Malcolm King  
Marissa King  
Michael King  
Rachel King  
Richard King  
Robert King  
Samuel King  
Tommy King  
Wendy C. King  
Wade Kingery  
Paul Kingham  
John Kingma  
Michael Kingsford  
Richard Kingsford  
Dawn Kingston  
Tigga Kingston  
Sanjay Kini  
Milan Kinkhabwala  
Margaret Kinnaird  
Peter Kinnevey  
Suna Kinnunen  
Tomoshige Kino  
Makoto Kinoshita  
Tetsu Kinoshita  
Kenichiro Kinouchi  
Osame Kinouchi  
Stefan Kins  
Elaine Kinsella  
Janni Kinsler  
Vincent Kint  
Hideaki Kinugasa  
Damaris Kinyoki  
Karin Kiontke  
Deborah Kipp  
Margaret Kipp  
Matt Kipper  
Tod Kippin  
John Kipritidis  
Yulia Kipryushina  
Gokhan Kir  
Orsolya Király  
Koneti Kiran  
Daniel Kirby  
James Kirby

Janine Kirby  
Karen Kirby  
Russell Kirby  
Tyler Kirby  
Karin Kirchgatter  
Christiane Kirchhoff  
Louis Kirchhoff  
Ann Kirchmaier  
David Kirchman  
Varvara Kirchner  
Wolfgang Kirchner  
Bruce Kirchoff  
Girish Kirimanjeswara  
Kohtaro Kirimura  
Yohei Kirino  
Erkan Kiris  
Yoshimitsu Kiriya  
Adam Kirk  
Jonathan Kirk  
Nathan Kirk  
Ryan Kirkbride  
Alexis Kirke  
Karla Kirkegaard  
Lawrence Kirkendall  
Grant Kirker  
Natasha Kirkham  
Pertti Kirkinen  
Theo Kirkland  
Kevin Kirkman  
Jamie B. Kirkpatrick  
Michael Kirkpatrick  
John Kirkwood  
Renata Kirkwood  
Nameer Kirma  
Laurence Kirmayer  
Antonis Kirmizis  
George Kirov  
Yonal Kirsal  
Alexander Kirsch  
Heidi Kirsch  
Irving Kirsch  
Max Kirsch  
Wolff Kirsch  
Lawrence Kirschner  
Joseph L. Kirschvink  
Paul Kirshen  
Lorrie Kirshenbaum  
Julia Kirshner  
Frank Kirstein  
Mark Kirstein  
Olivia Kirtley

Adam Kirton  
Stewart Brian Kirton  
Matt Kirwin  
Krzysztof Kiryluk  
Anna Kis  
Bernhard Kis  
Anton Kiselev  
Antonina Kiseleva  
Laszlo Kish  
Shigeki Kishi  
Shoji Kishi  
Takuya Kishi  
Taro Kishi  
Osamu Kishida  
Yasushi Kishimoto  
Stephen Kishner  
Thomas Kishor  
Avinash Kishore  
Nand Kishore  
Raj Kishore  
Sandeep Kishore  
Dagmara Kisiela  
Tomasz Kisielewicz  
Andor Kiss  
Hubert Kiss  
Ibolya Kiss  
Jozsef Kiss  
Lorand Kiss  
Rita Kiss  
William Kisseberth  
Alexei Kiselev  
Katarzyna Kissimova-Skarbek  
S. Kissler  
Grace Kissling  
Logan Kistler  
Anna Kistner  
Katalin Kis-Toth  
Jeremy Kiszka  
Munehiro Kitada  
Hiroshi Kitagaki  
Go Kitahara  
Toru Kitahara  
T. Kitai  
Ken Kitajima  
Shin-ichiro Kitajiri  
Keiichi Kitajo  
Yasunori Kitamoto  
Akihiro Kitamura  
Kenichiro Kitamura  
Seiya Kitamura  
Shumpei Kitamura

Katsunori Kitano  
Satomi Kitano  
Shigehisa Kitano  
Azusa Kitao  
Mitsutoshi Kitao  
Yuichi Kitasako  
Kazuyuki Kitatani  
Jiro Kitaura  
Haruki Kitazawa  
Masashi Kitazawa  
Takanari Kitazono  
Douglas Kitchen  
Maria Kitchen  
Mark Kitchen  
Newell Kitchen  
Scott Kitchen  
Henry Kitchener  
John Kitchin  
James Kite  
Mary E. Kite  
Soressa Kitessa  
Maksim Kitsak  
Paraskevi Kitsiou  
Glenn Kitsune  
Todd Kitten  
Daniel Kitterer  
Clemens Kittinger  
John Kittinger  
Roman Kittl  
Rick Kittles  
James Kitts  
Yoshiaki Kiuchi  
Dietmar Kivelitz  
Minna Kivimäenpää  
Vesa Kiviniemi  
Shaye Kivity  
Noah Kiwanuka  
Ryoiti Kiyama  
Yulia Kiyan  
Eugene A. Kiyatkin  
Tomoko Kiyohara  
Toko Kiyonari  
Ken Kiyono  
Anil Kizha  
Muhammed Kizilgul  
Magnus Kjaergaard  
Søren Kjærgaard  
Jens Kjeldsen-Kragh  
Birthe Kjellerup  
Olav Sigurd Kjesbu  
Elin Kjørsvik

Morten Kjos  
Fayette Klaassen  
Ingeborg Klaassen  
Eline Klaassens  
Cheryl Klaiman  
Riina Klais  
Silke Klamer  
Petr Klan  
Oya Klanten  
Barbara Klapcinska  
Rebecca Klaper  
Sarah Klapproth  
Jaroslav Klápste  
Avihu Klar  
Samara Klar  
Eva Klaric  
Philipp Klaritsch  
George Klarmann  
Ursula Klaschka  
Zachary Klase  
Henrikje Klasen  
K.C. Klasing  
Per Johan Klasse  
Karen Klassen  
R. Klassen  
Nichole Klatt  
Roberta Klatzky  
Christoph Klauer  
Sebastian Klaus  
Miriam Klausberger  
Jeffrey Klausner  
Dag Klaveness  
Caroline Klaver  
Irena Kleckova  
Leszek Kleczkowski  
Claude Klee  
Jorg Kleeff  
Andis Klegeris  
Juliane Klehmet  
David Kleijn  
Birgit Kleim  
Evan Kleiman  
Carina Klein  
Cliff Klein  
Eili Klein  
Emily Klein  
Günter Klein  
Jochen Klein  
John Klein  
Karl Klein  
Lloyd Klein

Mark Klein  
Marlise Klein  
Michael Klein  
Peter Klein  
Pierre Klein  
Raymond Klein  
Richard Klein  
Ronald Klein  
Sabine Klein  
Stanley Klein  
Ulf Klein  
Petra Kleinbongard  
Marisa Klein-Gitelman  
Alex Kleinjan  
Tobias Kleinjung  
Daniel Kleinman  
Hynda Kleinman  
Christoph Kleinn  
Kevin M. Kleinow  
Ruth Kleinpell  
Immo Kleinschmidt  
Christoph Kleinschnitz  
Maria Kleinstaeuber  
Maria Kleinstäuber  
Sabine Kleinsteuber  
Thomas Kleinteich  
Angelika Klein-Theyer  
Ingo Kleiter  
Sabina Kleitman  
Bertrand Kleizen  
Karel Klem  
Michael Klemba  
Friederike Klempin  
Jochen Klenk  
Elizabeth Klerman  
Hilit Kletter  
Alexa Klettner  
Arnulf Kletzin  
Alexander Klibanov  
Alan Klide  
Reinhold Kliegl  
Catharina Klijn  
Vaclav Klika  
Richard Kliman  
Lars Klimaschewski  
Magdalena Klimek  
Corrine Kliment  
Yann Klimentidis  
Paul Klimo  
Pavel Klimov  
Holger Klinck

Anthony Kline  
David Kline  
Michele Klingbeil  
Carolyn Klinge  
Aloysius Klingelhutz  
Georgeanna Klingensmith  
Jonathan Klingler  
Elizabeth S Klings  
Barbara Klink  
Eveline Klinkenberg  
Kenneth Klinker  
Dennis Klinman  
Amira Klip  
Alexander Klishko  
Janne Klitgaard  
Kirstine Klitgaard  
Vanja Kljajevic  
Goran Klobucar  
Agnieszka Kloch  
Michael Klockmann  
Andrzej Kloczkowski  
Lorie Kloda  
Roman Kloeckner  
Brian Kloeppe  
Stefan Kloeppe  
Jennifer Kloeppe  
Casey Klofstad  
Peter-Christian Klöhn  
Jan Klohs  
Michael Klompas  
Bernard Klonjkowski  
Elizabeth Klonoff  
Kimberly Klonowski  
Wlodzimierz Klonowski  
Rafael Klorman  
Gerhard Klösch  
Karl Klose  
Kathy Kloss  
Thiago Kloss  
Hilde Kloster Smerud  
Fabian Klostermann  
Christian Klotz  
Luisa Klotz  
Matthias Klotz  
Shahnaz Klouche  
Vasily Klucharev  
Jochen Klucken  
Bryan Kluever  
Achim Klug  
Christian Klug  
Judith Kluge

Ricardo Kluge  
Michael D. Kluger  
Georgette Kluiters  
Bernhard Klumpp  
Chonticha Klungthong  
Barbara Klupp  
Michael Klüppel  
Jan Klusmann  
Glenn Klute  
Harald Klüter  
Markus Knaden  
Sara Knaeps  
Christine Knaevelsrud  
Balázs Knakker  
Tomas Knapen  
David Knapp  
Gregory Knapp  
Karen Knapp  
Michael Knapp  
Oliver Knapp  
Pamela Knapp  
Peter Knapp  
Sandra Knapp  
Sonja Knapp  
Stian Knappskog  
Ewelina Knapska  
Siegfried Knasmüller  
Shirley Knauer  
Brian Knaus  
Ulla Knaus  
Beat Knechtle  
Mark A. Knepper  
Paul Knepper  
Friederike Knerlich-Lukoschus  
Sarah Knerr  
Rachel Knevel  
Kali Kniel  
Olaf Kniemeyer  
Andrea Knight  
Andrew Knight  
Dave Knight  
David Knight  
Mark Knight  
Robert A. Knight  
Rod Knight  
Dan Knights  
Hanna Knihtila  
Maria Knikou  
Duleeka Knipe  
Kristen Knipe  
Corina Knipper

Marlies Knipper  
Uwe Knippschild  
Yuriy Knirel  
Charles Knirsch  
Darryn Knobel  
M. Knobf  
Jürgen Knobloch  
Mirjam Knol  
Lisa Knoll  
Maximilian Knoll  
Björn Knollmann  
Thomas Knoop  
Thomas Knopfel  
Michael Knopp  
Gerhard Knothe  
Kirstin Knouse  
Ben Knowles  
Edd Knowles  
Joshua Knowles  
Anne Knowlton  
Katharine Knowlton  
Christine Knox  
Dayan Knox  
Travis Knuckles  
Anders Knudby  
Thomas Knudsen  
Cheryl Knudson  
Duane Knudson  
Christina Knussen  
Mitchell Knutson  
Andrew Ko  
Benjamin Ko  
Bor-Sheng Ko  
Byung Joon Ko  
Chang-Yong Ko  
Fanny Ko  
Fung Chi Ko  
Hsin-Kuo Ko  
Hyun-Jeong Ko  
In Kap Ko  
Ja Kyong Ko  
Jesang Ko  
Ji Ko  
Joshua Ko  
Kisung Ko  
Wen-Chien Ko  
Wing Ko  
Yu Ko  
Yu-Lin Ko  
Yoshihiro Kobae  
Darwyn Kobasa

Gen Kobashi  
Jon Kobashigawa  
Akio Kobayashi  
D. Kobayashi  
Hisataka Kobayashi  
Ichiro Kobayashi  
Ichizo Kobayashi  
Kazuto Kobayashi  
Kazuya Kobayashi  
Lindsay Kobayashi  
Masahiro Kobayashi  
Masaki Kobayashi  
Miwako Kobayashi  
N. Kobayashi  
Scott Kobayashi  
Shin Kobayashi  
Shoko Kobayashi  
Taisuke Kobayashi  
Taku Kobayashi  
Tamaki Kobayashi  
Tatsuya Kobayashi  
Teruyoshi Kobayashi  
Tetsuo Kobayashi  
Tetsuya Kobayashi  
Tohru Kobayashi  
Yasuki Kobayashi  
Yasuo Kobayashi  
Yoshinao Kobayashi  
Yoshiro Kobayashi  
Yuko Kobayashi  
Yusuke Kobayashi  
Dennis Kobelt  
Martina Köberl  
Tomasz Kobiela  
Gary Kobinger  
Beryl Koblin  
Jennifer Koblinski  
Stephan Koblmüller  
Kerri Kobryn  
Dylan Kobsar  
Christopher Kobylecki  
Çetin Koç  
Jaroslav Koca  
Rüya-Daniela Kocalevent  
Bekir Kocazeybek  
Simon Kocbek  
E. Ahmed Koceir  
Ayhan Kocer  
Alexander Koch  
Christof Koch  
Flávia Koch

Florian Koch  
Hagen Koch  
Hans-Georg Koch  
Ina Koch  
Iring Koch  
Jonathan Koch  
Marcus Koch  
Paul Koch  
Philipp Koch  
Thea Koch  
Wayne Koch  
Jacob Kocher  
Thomas Kocher  
Nils Koch-Henriksen  
Yuta Kochi  
Judith Kochmann  
Marguerite Koch-Rose  
Marleen Kock  
Robin Köck  
Ferdinand Köckerling  
Janwillem Kocks  
Maaïke Kockx  
Yoshiro Koda  
Maheedhar Kodali  
Hiroaki Kodama  
Stephen Kodish  
Gergana Kodjebacheva  
Krithika Kodumudi  
Dwight Koeberl  
Muriel Koehl  
Jeffrey Koehler  
Karl Koehler  
Karsten Koehler  
Sara Koehler-McNicholas  
Ger Koek  
Thomas Koelewijn  
Katja Koelkebeck  
Christian Koelling  
Philipp Koellinger  
Albert Koelmans  
Stefan Koelsch  
Jessie Koen  
Gijsje Koenderink  
Rory Koenen  
Christoph Koenig  
Inke Koenig  
Julian Koenig  
Melissa Koenig  
Sarah Koenig  
Niko Koeniger  
Joerg Koenigstorfer

Hannah Koenker  
Constantianus Koenraad  
Tyler Koep  
Klaus-Peter Koepfli  
Michael Koeppen  
Veronika Koeppen  
Leonardo Koerich  
Jane Koerner  
Mirjam Koerner  
Sally Koerner  
Henk Koerten  
Janneke Koerts  
Johannes Koestel  
Dirk Koester  
Steve Koester  
Ad Koets  
Peter Koetsier  
Mikhail Koffarnus  
Jonathan Koffman  
Barbara Kofler  
David Kofler  
Jiri Kofranek  
Paulo Kofuji  
Fumitaka Koga  
Jun-ichiro Koga  
Kenichi Koga  
Masatoshi Koga  
Ryuichi Koga  
Donat Kögel  
Manjunatha Kogenaru  
Lydia Kogler  
Michael Kogut  
Tehila Kogut  
Andrew Koh  
Ho-Jin Koh  
Hwee Ling Koh  
Jae-Young Koh  
Jin Koh  
Mariko Koh  
Seong-Ho Koh  
Timothy Koh  
Victor Koh  
Woon-Puay Koh  
Yasuhiro Koh  
Kentaro Kohagura  
Alison Kohan  
Hamid-Reza Kohan-Ghadr  
R. Sarah Kohansal  
Katsuhiko Kohara  
Michinori Kohara  
Kevin Kohl

Karin Köhl  
Connie Kohler  
Pamela Kohler  
Dieter Köhler  
Iris Köhler  
Ajay Kohli  
Rahul Kohli  
Rohit Kohli  
Ruhail Kohli  
Rüdiger Köhling  
Rebekka Kohlmann  
Sepp Kohlwein  
Andre Kohn  
David Kohn  
Jacqueline Kohn  
Satomi Kohno  
Mark Kohr  
Takahide Kohro  
Holbrook Kohrt  
Jun Kohyama  
Ayato Kohzu  
Masayo Koide  
Roger Koide  
Eddie Koifman  
Masato Koike  
Shinsuke Koike  
Tatsuya Koike  
Teruhiko Koike  
Juha Koikkalainen  
Rajeshwari Koilkonda  
Diwa Koirala  
Jari Koistinaho  
Ari-Pekka Koivisto  
Hisashi Koiwa  
Akio Koizumi  
Chie Kojima  
Gotaro Kojima  
Itaru Kojima  
Seiji Kojima  
Shihoko Kojima  
Takashi Kojima  
Chee Choy Kok  
Jan Kok  
Jen Kok  
Niels Kok  
Philippe Kok  
Sang-Heng Kok  
Victor Kok  
Wouter Kok  
Lauren Kokai  
Khor Kok-Chin

David Kokel  
Alina Kokhanenko  
Yusuf Köklü  
Ladislav Kokoska  
George Kokotos  
Sulev Koks  
Daisuke Kokuryo  
John Koland  
Andrew Kolarik  
Miroslav Kolarík  
James Kolasinski  
E. Kolb  
Frederic Kolb  
Nikolay Kolchanov  
Michael Koldehoff  
Crystal Kolden  
John Kolega  
Hemanta Koley  
Nitin Kolhe  
Vassilis Koliatsos  
Jelena Kolic  
Andrzej Kolinski  
Yolanda Kolisa  
Judith Kolkman  
Miriam Kolko  
Roxy Koll  
Anup Kollanoor Johny  
Nicole Kollars  
Akos Koller  
Ingrid Koller  
Robert Koller  
Sonja Kollers  
Avinash Kollipara  
Laxmikanth Kollipara  
Stefan Kollmannsberger  
Martin Kollmar  
Richard Kollmar  
Kathrin Kollndorfer  
Afsal Kolloli  
Jay Kolls  
Nageswara Rao Kollu  
Harald Kolmar  
Carolin Kolmeder  
Alex Kolodkin  
Gerald Kolodny  
Jeremi Kolodziejek  
Dmitry Kolomenskiy  
M. B. Kolozsvary  
Mette Kolpen  
Anne-Brit Kolsto  
Simon Kolstoe

Ismail S. Koltas  
James Koltes  
Walter Koltun  
H. Komai  
Kanako Komaki-Yasuda  
Padmini Komalavilas  
Anton Komar  
Nicholas Komar  
Martina Komarkova  
Anthony Komaroff  
Haruki Komatsu  
Yoshihiro Komatsu  
Takao Komatsuda  
Toshihiko Komatsuzaki  
Nobuyuki Komazawa  
Francis Kombe  
Barry Komisaruk  
Andrey Komissarov  
Ramakrishna Kommagani  
Yoshihiro Komohara  
Akinola Komolafe  
Satoshi Komoto  
Katie Kompoliti  
Elizaveta Kon  
Valentina Kon  
Koffi Konan  
Jürgen Konczalla  
Kelika Konda  
Ganesh Kondabattula  
Paturu Kondaiah  
Anand Kondapi  
Kanthi Kiran Kondepudi  
Subramanyam Kondeti  
Hidehiro Kondo  
Hideki Kondo  
Kazuhisa Kondo  
Michelle Kondo  
Saturo Kondo  
Takashi Kondo  
Toshikazu Kondo  
Yutaka Kondo  
Michio Kondoh  
Dániel Kondor  
Ganesh Konduri  
Nagarjun Konduru  
Anthony Kong  
Bo Kong  
Christina Kong  
Fanbin Kong  
Fanmei Kong  
Feng Kong

Grace Kong  
Jiming Kong  
Jin Kong  
Ka-Yiu Edwin Kong  
Lan Kong  
Ling-Dong Kong  
Lingrang Kong  
Lingyi Kong  
Lisheng Kong  
Qingfei Kong  
Qingpeng Kong  
Qingzhong Kong  
Qiusheng Kong  
Richard Kong  
Rui Kong  
Shengchun Kong  
Wei Kong  
Weijun Kong  
Xiangfeng Kong  
Xiangrong Kong  
Xiangyu Kong  
Yichun Kong  
Yun Kong  
Anine Kongelf  
Alice Kongsted  
Gerhardt König  
Jochem König  
Kai König  
Matthias König  
Frits Koning  
Rud H. Koning Koning  
Y. Konishi  
Prasad Konkalmatt  
Anish Konkar  
Barbara Konkle  
Deborah Konkle-Parker  
Monika Konnert  
Kotaro Konno  
Norifumi Konno  
Tomohiro Konno  
Masahiro Kono  
Elisa Konofagou  
Veronika Konok  
Tadeusz Kononowicz  
Ivo Konopásek  
Matt Konopinski  
Anna Konovalova  
Daniel Konrad  
Franziska Konrad  
Sara Konrath  
Mary Konsolaki

Evdokimos Konstantinidis  
Eleni Konstantinou  
Ioannis K Konstantinou  
Tsuneo Konta  
Vesa Kontinen  
Vasilis Kontis  
Dimitris Kontodimas  
Evangelos Kontopantelis  
Georgios Kontorinis  
Despina Kontos  
Dimitris Kontoyiannis  
Irina Kontsevaya  
Kevin Konty  
Kishori Konwar  
Viktoria Konya  
Brian Koo  
Chi Wan Koo  
Hyun Koo  
Sunwoo Koo  
Terry Koo  
Winston Koo  
Michael Koob  
Shahriar Koochekpour  
Katherine Kooij  
Sander Kooijmans  
Mirjam Kool  
Olivier Koole  
Jeroen Kooman  
Yen Ling Koon  
Karanjit Kooner  
Demian Koop  
René Koopman  
Sietse-Jan Koopmans  
Joseph Koopmeiners  
Kathelijne Koops  
Maarten Koornneef  
Bernd Koos  
B.P.G. Koot  
Neeltje Kootstra  
Ian Kopacka  
Alexander Kopatz  
Dennis Kopecko  
Jan Willem Koper  
Helen Kopnina  
Jeffrey Kopp  
Marcel Kopp  
Ulla Kopp  
Georgia Koppe  
Janna Koppe  
Laetitia Koppe  
Kadri Koppel

Joel D. Kopple  
Ravi Koppolu  
Germán Kopprio  
Robert Koprowski  
Suzanne Koptur  
Jakub Kopycinski  
Jenya Kopylov  
Karen Korabik  
Bato Korac  
Günther Koraimann  
Sergei Koralov  
Nicolas Koranyi  
Judith Korb  
Jan Korbel  
Masaaki Korenaga  
Daniel Korevaar  
Tim Korevaar  
Martina Korfei  
Mayuresh Korgaonkar  
Kaveri Korgavkar  
Julia Koricheva  
Netanel Korin  
Anton Korinek  
Gilly Koritzky  
Miikka Korja  
Hannu Korkeala  
Henri Korkes  
Selcuk Korkmaz  
Thomas Korn  
Anita Körner  
Roman Körner  
Konstantin Kornev  
Panagiotis Kornilios  
Peter Kornprat  
Abraham Korol  
Alexey Koronovskii  
G. Korosoglou  
Konstantin Korotkov  
Siran Koroukian  
Panagiotis Korovessis  
Ilkka Korpela  
Katri Korpela  
Nicholas Korres  
Nicholas E. Korres  
Sergey Korshunov  
Monica Korsnes  
Zoltan Korsos  
Lise Korsten  
Insa Korten  
Marleen Kortenoeven  
Michiel Korthals

Ozlem Korucuoglu  
Izabela Korwel  
Marek Korzeniowski  
Donna Korzick  
Viktor Korzun  
Lidia Kos  
Martin Koš  
Monika Kosacka  
Takayuki Kosaka  
Carl Koschmann  
Mirja Koschorke  
Isabelle Koscinski  
Ewa Kosciuczuk  
Tomokazu Koshiba  
Isao Koshima  
Ajeesh Koshy Cherian  
Urszula Kosikowska  
Jiri Kosinka  
Carolin Kosiol  
Matthew Koski  
Kostantinos C Koskinas  
Ralf Kosma  
Arkadiusz Kosmala  
Cassandra Kosmidou  
Victor Kosmopoulos  
Simone Kosol  
Klára Kosová  
Michael Kosoy  
Michael Koss  
Jens Kossmann  
Michael Kossmeyer  
Malgorzata Kossowska  
Amanda Kost  
Christian Kost  
Rumen Kostadinov  
Vladimír Košťál  
Zvonko Kostanjcar  
Andreas Koster  
Annemarie Koster  
Raphael Koster  
Roelof Koster  
Reinhard Köster  
Rena Kosti  
Vladimir Kostic  
Deliana Kostova  
Tatiana Kostrominova  
Shunichi Kosugi  
Patrycja Koszalka  
Jacek Kot  
Janaiah Kota  
Eiji Kotani

Ahmed Kotb  
B. Kotchoubey  
Adaikala Koteswari  
Chandrasekhar Kothapalli  
Kumar S. Kothapalli  
Naga Rama Kothapalli  
Ute Kothe  
Kavitha Kothur  
Ewa Kotlarska  
Aleksandra Kotlinska-Lemieszek  
Primož Kotnik  
Roman Kotov  
Martyna M. Kotowska  
Apostolos Kotsialos  
Ioannis Kotsianidis  
Joanne Kotsopoulos  
Nikolaos Kotsopoulos  
Dimitra Kotsougiani  
Mark Kotter  
Shyamasundaran Kottlil  
Jack Kottwitz  
M. Kotula-Balak  
Atul Kotwal  
Paul Kotzbauer  
Andrew Kotze  
Joerg Kotzerke  
Junping Kou  
Roland Yao Wa Kouassi  
Andrew Kouba  
Georgios Koubouris  
Namkje Koudenburg  
Panagiotis Kougias  
Azam Kouhkan  
Ourania Koukoura  
M. Koukourakis  
Nikolaos Koundourakis  
Richard Koup  
Dimitrios Kouretas  
Anargyros Kouris  
Yiannis Kourkoutas  
Mahmoud Koushesh Saba  
Evanthia Kousi  
Chandrasekar Kousik  
Antonios Kousoulis  
Irena Koutna  
Michael Koutsilieris  
George Koutsoudakis  
Wilma Koutstaal  
Andrej Kovac  
Dejan Kovac  
Eva Kovacevic

Melissa Kovach  
Borut Kovacic  
Jason Kovacic  
Agnes Melinda Kovacs  
Krisztina Kovacs  
Laszlo Kovacs  
Stephanie Kovacs  
Mihály Kovács  
Tibor Kovács  
Susan Koval  
Zuzana Kovalova  
Ilona Kovalszky  
Petri Kovanen  
Joy Kovar  
Zrinka Kovarik  
Jaromír Kovářík  
Petia Kovatcheva-Datchary  
Charles Koven  
Sara Kover  
Michal Kovo  
Stephanie Kowal  
Bernd Kowall  
M. Anna Kowalska  
Markus Kowarik  
Akihiro Koyama  
Alain Koyama  
Asuka Koyama  
Maki Koyama  
Tatsuki Koyama  
Toshihiro Koyama  
Kaloian Koynov  
Igor Kozak  
Leslie Kozak  
Dima Kozakov  
Richard Kozarek  
Elisa Kozasa  
Sebastian Kozerke  
Jacek Koziel  
Alan Kozikowski  
Elena Kozina  
Zoltan Kozinszky  
Ken Kozloff  
Andrey Kozlov  
Sergey Kozlov  
Pamela Kozlowski  
Zbynek Kozmik  
David Kozono  
Lukasz Kozubowski  
Renata Kozyraki  
Varvara Kozyreva  
Anita Kozyrskyj

Samory Kpotufe  
Claudine Kraan  
Anne Marie Krachler  
Anne-Marie Krachler  
Joep Kraeima  
Alexandra Kraemer  
Fredric Kraemer  
Kenneth Kraemer  
Nicolle Kraenkel  
Kurt Kraeuchi  
Mary Kraft  
Peter Kraft  
Christian Krägeloh  
Kristian Kragholm  
Thomas Krahe  
Peter Kraiczny  
Dimitri Krainc  
Douglas Krakower  
Andrej Kral  
John Kral  
Martina Kralinger  
Anastasia (Natasha) Kralli  
Rodger Kram  
Achim Kramer  
Andrew Kramer  
Boris Kramer  
Helmut Kramer  
Jennifer Kramer  
Jill Kramer  
John Kramer  
Mario Kramer  
Phil Kramer  
Randall Kramer  
Richard Kramer  
Benjamin Krämer  
Bernhard Krämer  
Julia Krämer  
Oliver Krämer  
Andrei Kramerov  
Julia Krammer  
Kamil Kranc  
Elena Kranioti  
Branka Kranjc  
Julie Krans  
Keshav Kranthi  
Slavica Krantic  
David Krantz  
Alexander Kranz  
Daniel Krappmann  
Sven Krappmann  
Christian Krarup

Alla Krasikova  
Maria Krasilnikova  
Allan Krasnik  
Ines Krass  
Vessela Krasteva  
Lukáš Kratochvil  
Anton Kratz  
Molly Kratz  
Robert A. Kratzke  
Mary Krauland  
Alexander Kraupner  
Edward Kraus  
Helen Kraus  
Johann Kraus  
Nina Kraus  
Peter Kraus  
Annalinda Krause  
Duncan Krause  
E. Tobias Krause  
Kerstin Krause  
Martin Krause  
Matthew Krause  
Mauricio Krause  
Niklas Krause  
Philip Krause  
Robert Krause  
Roland Krause  
Vanessa Krause  
Ben Krause-Kyora  
Stefan Krauss  
Csilla Krausz  
Allen Kraut  
Ellen Krautkrämer  
Andra Krauze  
Alexandra Kravchenko  
Vladimir Kravchenko  
Richard Kravitz  
Meg Krawchuk  
Peter Krawczel  
Greg Krawczyk  
Marcin Krawczyk  
Michal Krawczyk  
Pawel Krawczyk  
Przemek Krawczyk  
Michael Krawinkel  
Klaus Kraywinkel  
Emanuel Krebs  
Mark Krebs  
Michael Krebs  
Nancy Krebs  
Shelly Krebs

Cory Krediet  
Paul Krediet  
Raymond Krediet  
Pamela Kreeger  
Antonia Krefeld-Schwalb  
Stefan Kreft  
Clint Krehbiel  
Brent Kreider  
Benjamin Kreifelts  
Bernd Kreikemeyer  
Rebecca Kreiling  
Gabriel Kreiman  
Aimee Kreimer  
Alexandra Kreins  
Barry Kreiswirth  
Martyna Krejmer-Rabalska  
Natali Krekeler  
Iwona Krela-Kazmierczak  
Frank Krell  
Peter Krell  
Dimitry Kremontsov  
David Kremontz  
Colin Kremer  
Patricia Kremer  
Johanna Kremer Hovinga  
Jan Kremers  
Vladimír Kren  
Marco Krengli  
Hartmut Krentz  
William Krenzer  
Joan Krepinsky  
Vladimir Kreslavski  
W. John Kress  
Jochen Kressler  
Irene Kretchy  
Alexander Kretschmer  
Dorothee Kretschmer  
Karsten Kretschmer  
Robert Kretsinger  
Antoniana Krettli  
Colin Kretz  
Carole Kretz-Remy  
Michael Kreuter  
Susanne Kreuzer-Redmer  
Jürgen Kreuzwieser  
Carmen Krewer  
Grigorios Krey  
Wolfgang Kreyling  
Skirmantas Kriaucionis  
Steven Kridel  
Verena Kriechbaumer

Peter Krieg  
Alison Kriegel  
Patrik Krieger  
Sophie Krieger  
Anja Krieger-Liszkay  
Lance Kriegsfeld  
Susi Kriemler  
John Kriesel  
Detlef Krieter  
Jillian Kril  
Sheldon Krinsky  
Michael Krings  
Sharon Krinsky-McHale  
James Krinsky  
Kewal Krishan  
Rebecca Krisher  
Anand Krishna  
Neel Krishna  
D. Krishna Kumar  
R. Krishnakumar  
Subramanian Krishnakumar  
Nandini Krishnamoorthy  
Narayanan Krishnamurthi  
Kaarkuzhali Krishnamurthy  
Karthik Krishnamurthy  
Prasanna Krishnamurthy  
Anand Krishnan  
Arjun Krishnan  
Giri Krishnan  
K. Krishnan  
Manju Krishnan  
Natraj Krishnan  
Nithya Krishnan  
Ramaswamy Krishnan  
Saloni Krishnan  
Vengadesan Krishnan  
Venkatesh Krishnan  
Ashok Krishnaswami  
Jagdish Krishnaswamy  
Jayendra Krishnaswamy  
Ghattu Krishnaveni  
Bernhard Krismer  
Jennifer Kriss  
Eugene Krissinel  
William Kristan  
Erik Kristensen  
Michael Kristensen  
Søren Kristensen  
Tibor Kristian  
Glen Kristiansen  
Christopher Kristich

Hook Kristin  
Arni Kristjansson  
Julijana Kristl  
Michael Kristo  
Ladislav Kristoufek  
Delane Kritsky  
Paula Kriz  
David Krizaj  
Kristina Krklec  
Saskia Kroeckel  
Candyce Kroenke  
Hannes Kröger  
Jesper Krogh  
Trine Krogh-Madsen  
Michelle Krogsgaard  
Tore Krogstad  
Jona Krohn  
Stephan Krohn  
Tim Krohne  
Matthias Kroiss  
Thomas Kroj  
Paal Krokene  
Fernanda Kroker  
Jessica L Krok-Schoen  
Elzbieta Krol  
Andrzej S. Krolewski  
Bastiaan Krom  
Irving Kron  
Michael Kron  
Tomas Kron  
Andreas Kronbichler  
Lise Kronborg  
Ziad Kronfol  
Martin Krönke  
James Kronstad  
Erna Kroon  
Ian Krop  
Eric Kropf  
Matthias Kropf  
Andrew M. Kropinski  
Matthew Krosch  
Ursula Krotscheck  
Johns Krouse  
Susan Krown  
Janet Krska  
Jürgen Krücken  
Dilja Krueger  
Joerg Krueger  
Robert Krueger  
Stacy Krueger-Hadfield  
Edward Krug

Joachim Krug  
Ruan Kruger  
Andreas Krüger  
Björn Krüger  
Karsten Krüger  
Kerstin Krüger  
Markus Krüger  
Nadine Krüger  
Ilja Kruglikov  
Andrey Kruglov  
Nicole Kruh  
Willem Kruijer  
Marieke Kruip  
Marta Kruk-Slomka  
Marcos Krull  
Thierry Krummel  
Christian Krupke  
Michael Kruppa  
Clemens Kruse  
Michael Kruse  
Paul Krusic  
Oleg Krut  
Michael Krützen  
Maarja Kruusmaa  
Frank Kruyt  
Per Kryger  
Vera Krymskaya  
Angelos-Miltiadis Kryptos  
Richard Kryscio  
Andriy Kryshtafovych  
Karolina Krysinska  
Gerald Krystal  
Dominik Krzanicki  
Marcin Krzystanek  
Martin Krzywinski  
Daniel Ksepka  
Nicholas Ktistakis  
Nam Su Ku  
Seung-Yup Ku  
Meng-Kiat Kuah  
Jie Kuai  
Chee Sian Kuan  
Chien-Tsun Kuan  
Garry Kuan  
Win Sen Kuan  
Yu-Hsiang Kuan  
Yung-Shu Kuan  
Jialiang Kuang  
Jian-Fei Kuang  
Rui Kuang  
Yan-Ping Kuang

Barthelemy Kuate Defo  
Hiroshi Kuba  
Steven Kubalak  
Karen Kubena  
Bruno Kubiak  
Jacek Kubiak  
Andreas Kubicek  
John Kubie  
Lubica Kubikova  
Leszek Kubin  
Robert Kubina  
Jason Kubinak  
Ralf Kubitz  
Janet Kübler  
Keitaro Kubo  
Tomohide Kubo  
Tomohiko Kubo  
Toshio Kubo  
Chieri Kubota  
Kengo Kubota  
Naoto Kubota  
Satoko Kubota  
Yoshitaka Kubota  
Flavia Kubrusly  
Gregory Kucera  
Michal Kucera  
Otto Kucera  
Amy Kuceyeski  
Andreas Kuchar  
Karoline Kuchenbaecker  
Florian Kuchenbauer  
Anna Kuchina  
Stefanie Kuchinsky  
Suresh Kuchipudi  
Rachel Kuchtey  
Ulrich Kück  
Can Kucuk  
Murat Küçükevcilioglu  
Ozlem Kucukoglu  
Krzysztof Kuczera  
Takashi Kuda  
Raphael Kudela  
Andrzej Kudlicki  
Makoto Kudo  
Naomi Kudo  
Seishi Kudo  
Misha Kudryashev  
N.S. Kudryasheva  
Indira Kudva  
Yee Cheng Kueh  
Christian Kuehn

Sarah Kuehne  
Thomas D. Kuehne  
Dana Kuehnel  
Christine Kuehner  
Mathias Kuemmerlen  
C. Kuempel  
Christopher Kuenze  
Wayne Kuenzel  
Joshua Kuethe  
Jan Kuever  
Donald Kufe  
Jennifer Kugel  
Dimitris Kugiumtzis  
Heiner Kuhl  
Anja Kühl  
Hilmar Kühl  
Michael Kühl  
Angela Kuhla  
Barry Kuhle  
Kate Kuhlman  
Martin Kuhlwilm  
Joachim Kuhn  
Peter Kuhn  
Randall Kuhn  
Sabine Kuhn  
Steven Kuhn  
Thomas Kuhn  
Tobias Kuhn  
Bernhard Kühn  
Hartmut Kühn  
Lukas Kühn  
Wolfgang Kühn  
Lisa Kuhns  
Anne Marie Kuijpers-Jagtman  
Gerhardus Kuiper  
Jan-Herman Kuiper  
Benjamin Kuipers  
Praveen Kujal  
Miiamaaria Kujala  
Sanni Kujala  
Omar Kujan  
Elizabeth Kujawinski  
Jennifer Kuk  
Thomas Kukar  
Anna Kukekova  
Akiko Kukita  
Toshio Kukita  
Jyrki Kukkonen  
Piotr Kukla  
Pawel Kuklik  
Pavel Kuksa

Maria Kukuruzinska  
Katherine Kula  
Alanna Kulchak Rahm  
Franceli Kulcheski  
Gretchen Kuldau  
Josipa Kules  
David Kulesh  
Margarete Kulik  
Irene Kuling  
Jaime Kulisevsky  
Janina Kulka  
Avanti Kulkarni  
Gourihar Kulkarni  
Hemant Kulkarni  
Jayashri Kulkarni  
Mandar Kulkarni  
Mangesh Kulkarni  
Nachiket Kulkarni  
Rahul Kulkarni  
Ritwij Kulkarni  
S. Kulkarni  
Sakil Kulkarni  
Savita Kulkarni  
Shibani Kulkarni  
Snehal Kulkarni  
Subhash Kulkarni  
Tejaswini Kulkarni  
Louisa Kulke  
Martin Kulldorff  
Christopher Kullenberg  
Lewis Kuller  
Ottmar Kullmer  
Christopher Kulp  
Parul Kulshreshtha  
Ritu Kulshreshtha  
Erik Kulstad  
Jens Kultima  
Hye-Chung Kum  
Kathleen Kuman  
Cyrus Kumana  
Abhishek Kumar  
Addanki Kumar  
Ajay Kumar  
Ajit Kumar  
Alok Kumar  
Ambuj Kumar  
Amit Kumar  
Anil Kumar  
Anupriya Kumar  
Arun Kumar  
Arvind Kumar

Ashnil Kumar  
Ashok Kumar  
Ashutosh Kumar  
Ashwani Kumar  
Ashwini Kumar  
Aundy Kumar  
Bhavna Kumar  
D. Kumar  
Deepak Kumar  
Dhiraj Kumar  
Dhirendra Kumar  
Dinesh Kumar  
Haribalan Kumar  
Himanshu Kumar  
Jitendra Kumar  
Juhi Kumar  
Manish Kumar  
Manoj Kumar  
Maya M Kumar  
N. Pradeep Kumar  
Nagi Kumar  
Naveen Kumar  
Neelima Kumar  
Neeraj Kumar  
Nishant Kumar  
P.L. Kumar  
Parameet Kumar  
Paul Kumar  
Pawan Kumar  
Pradeep Kumar  
Prashant Kumar  
Rahul Kumar  
Rajeev Kumar  
Rajesh Kumar  
Rajiv Kumar  
Ramaiah Kumar  
Ramesh Kumar  
Ranjeet Ranjan Kumar  
Sachil Kumar  
Sachin Kumar  
Sameer Kumar  
Sandeep Kumar  
Sanjay Kumar  
Santhosh Kumar  
Santosh Kumar  
Satish Kumar  
Shaji Kumar  
Smita Kumar  
Srividya Kumar  
Subodh Kumar  
Sunil Kumar

Suresh Kumar  
Surinder Kumar  
Sushil Kumar  
Uttam Kumar  
Vijay Kumar  
Vijaya Kumar  
Vikas Kumar  
Vinod Kumar  
Vipan Kumar  
Vipin Kumar  
Vivek Kumar  
Mohan Kumar Haleyr Giri Setty  
Santosh Kumar T.R.  
Darshani Kumaragamage  
Govindasamy Kumaramanickavel  
Dinakantha Kumararatne  
N. Pradeep Kumarasamy  
Vasanthapuram Kumaraswami  
Deepak Kumaresan  
Jaya Kumari  
Jyothi Kumari  
Neelam Kumari  
Saru Kumari  
Veena Kumari  
Dharam Kumbhani  
Suchit Kumbhare  
Toshiaki Kume  
Tsutomu Kume  
Joseph Kumka  
Michael Kummer  
Terrance Kummer  
Wolfgang Kummer  
Robert Kumpf  
Karol Kumpfer  
Mont Kumpugdee-Vollrath  
Kattareeya Kumthip  
Li Kun  
Uday P. Kundap  
Dale Kunde  
Wilfried Kunde  
Anna Kundel  
Vikas Kundra  
Bijoy Kundu  
Gopal Kundu  
Kousik Kundu  
Manikuntala Kundu  
Pallob Kundu  
Shilajit Kundu  
C.T. Kung  
Chun-Chia Kung  
Takekazu Kunieda

Mark Kuniholm  
William Kunin  
Ken Kunisaki  
Yoshihiko Kunisato  
Jun Kunisawa  
Dorit Kunkel  
Brian Kunkle  
Mervi Kunnasranta  
Sreenivasan Kunnatheeri  
Radhika Kunnivil  
Ajaikumar Kunnumakkara  
Nikolaj Kunøe  
Anton Kunst  
Hans-Jörg Kunte  
Duangkamol Kunthalert  
Hiroshi Kunugi  
Setor Kunutsor  
Patrik Kunz  
Stefan Kunz  
Werner Kunz  
Wolfram Kunz  
Micha Kunze  
Reiner Kunze  
Andreas Kunzmann  
Marcus Kunzmann  
Caroline Kuo  
Chang-Fu Kuo  
Chao-Yang Kuo  
Chao-Yin Kuo  
Chen-Yen Kuo  
Chia-Hua Kuo  
Ching-Chuan Kuo  
Chin-Lung Kuo  
Chi-Yun Kuo  
Christin S Kuo  
Hann-Chorng Kuo  
Han-Yueh Kuo  
Hsiao-Che Kuo  
I. Fan Kuo  
John Kuo  
Li-Min Kuo  
Li-Wei Kuo  
Mei-Chuan Kuo  
Michael Kuo  
Shiu-Ming Kuo  
Sung-Hsin Kuo  
Yao Kuo  
Ya-Wen Kuo  
Yong-Fang Kuo  
Yuan-Hung Kuo  
Yu-Ting Kuo

Alptekin Küpçü  
Kornelius Kupczik  
Frieke Kuper  
Marcelo Kuperman  
Victor Kuperman  
Ron Kupers  
Gary Kupfer  
John Kupfer  
Linda Kupfer  
Peter Kuppens  
Sundaram Kuppu  
Saranya Kuppusamy  
Dhandapani Kuppuswamy  
Alexander Kuprin  
Hiroki Kurahashi  
Shigehiro Kuraku  
Takashi Kuramoto  
Makoto Kurano  
Harley Kurata  
Kosaku Kurata  
Shigeru Kuratani  
Lisa Kurczewski  
Shigeo Kure  
Boris Kurganov  
Gino Kurian  
Haruko Kurihara  
Hidemi Kurihara  
Toshihide Kurihara  
Danielle Kurin  
Tomoko Kurita-Ochiai  
Ajay Kuriyan  
Daniel Kurjak  
Satu Kurkela  
Helen Kurki  
Katelyn Kurkul  
Nyoman Kurniawan  
Satoshi Kuroda  
Shinji Kuroda  
Asato Kuroiwa  
Kenji Kurokawa  
Manabu Kurokawa  
Mineo Kurokawa  
Keiichi Kuroki  
Kimiko Kuroki  
Masayuki Kurosaki  
Deborah Kurrasch  
Florian Kurschus  
Beth Kurt  
Bollmann Kurt  
Özgür Kurt  
Vartan Kurtcuoglu

Stefan Kurtenbach  
Ann Kurth  
Margaret Kurth  
Krishna Kurthkoti  
Senem Kurtoglu  
Christian Kurts  
Mikko Kurttila  
Ira Kurtz  
Theodore Kurtz  
Isaac Kurtzer  
Teja Kuruganti  
Shree Kurup  
Michio Kuruso  
Ralf Kurvers  
Patrick Kury  
Eduard Kurz  
Mateusz Kurzawski  
Shigeru Kusagawa  
Josip Kusak  
Yuko Kusakabe  
Peter Kusalik  
Stefan Kusch  
Donna Kusewitt  
Toshihiro Kushibiki  
Tetsuo Kushiro  
Akifumi Kushiyama  
Jake Kushner  
Alena Kushniarevich  
Vitaly Kushnir  
Avadhesh Kushwaha  
Ashima Kushwaha Bhardwaj  
Kwadwo Kusi  
Claudia Kusmic  
Oliver Kuss  
Edo Kussell  
Diederik Kuster  
Niels Kuster  
Dennis Küster  
Shigeru Kusumoto  
Andrzej Kutarski  
Mzia Kutateladze  
Jason Kutch  
Anton Kutikhin  
Maja Kutlaca  
Hana Kutlikova  
Bryan Kutner  
Verena Kutschera  
Tiit Kutser  
Nobuyuki Kutsukake  
Elizabeth Kutter  
Raman Kutty

Marta Kutwin  
Satu Kuure  
Johanna Kuusisto  
Jaana Kuuskeri  
Mikko Kuussaari  
Masanari Kuwabara  
Takashige Kuwabara  
Keisuke Kuwahara  
Ichiro Kuwahira  
Tomoyuki Kuwaki  
Tomomi Kuwana  
Serdar Kuyucak  
Chris Kuzawa  
Alan Kuzirian  
Ivan Kuzmin  
Andrei Kuzminov  
Alexey Kuznetsov  
Boris Kuznetsov  
Kiyotaka Kuzushima  
Masafumi Kuzuya  
Miloslav Kverka  
Jan Kvet  
Kristina Kvile  
Brian Kvitko  
Hau Kwaan  
Bernard Kwabi-Addo  
Cheol Kwak  
Mi-Kyoung Kwak  
Suryang Kwak  
Youn-Sig Kwak  
Ada Kwan  
Ann Kwan  
Johnny Kwan  
Raymond Kwan  
Douglas Kwazneski II  
Artur Kwiatkowski  
Malgorzata Kwiecien  
Marcin Kwissa  
Anne Kwitek  
Boon-Chong Kwok  
Hang Fai Kwok  
Man Ki Kwok  
Sylvia Y. C. L. Kwok  
Timothy Kwok  
Xinjin Kwok  
Young Kwok  
Hyuk-Moo Kwon  
Hyuk-Sang Kwon  
Hyung Wook Kwon  
Janice Kwon  
Jung-Hwan Kwon

MinHyuk Kwon  
MiYoung Kwon  
Ohbyung Kwon  
Ohseok Kwon  
Oran Kwon  
Ronald Kwon  
Seung-Hwan Kwon  
Sung Woo Kwon  
Tae-Geon Kwon  
Tae-Hwan Kwon  
Yong Hoon Kwon  
Young Jik Kwon  
Younghoon Kwon  
Jacky Kwong  
Peter Kwong  
Tin Kyaw  
Jennifer Kyle  
Tina Kyndt  
Kyriakos Kypreos  
Chris Kypridemos  
Una Kyriacos  
Constantinos Kyriakis  
Stavroula Kyriazi  
Ioannis Kyrrou  
Vasileios Kyttaris  
Kim Kyunggon  
Evan Kyzar  
Coralie L'Ollivier  
Antonio La Cava  
Anne Camille La Flamme  
Susanne la Fleur  
Stefano La Malfa  
Roberto La Marca  
Rafael La Perna  
Patrick La Riviere  
Camilo La Rota  
Giuseppe La Torre  
Timo Laaksonen  
Liedewij Laan  
Maris Laan  
Tiina Laatikainen  
Tracey-Lea Laba  
Daniel LaBarbera  
José Labarere  
Jean Labarre  
Vincent Labatut  
Jessy Labbe  
Cyril Labbé  
A. Desiree LaBeaud  
Bernard Labedan  
Vinod Labhasetwar

Nazzarena Labo  
Patrick Labonte  
Mario Laborda  
Aurore Labourel  
Mariano Labrador  
Pascal Labrousse  
Lucja Labuda  
Andrew Lac  
Lucas Lacasa  
Federica Lacasella  
Ricardo Lacchini  
Donato Lacedonia  
Elisa Lacerda  
Joao Lacerda  
James Lacey  
Simon Lacey  
Joseph Lachance  
Marc-André Lachance  
John Lachin  
Salil Lachke  
Nico Lachmann  
Nathan Lachowsky  
Birgit Lackner  
Michaela Lackner  
Alicia Lacoma  
Lilian Lacourpaille  
Tamara E. Lacourt  
Francesco Lacquaniti  
Benoit Lacroix  
Christophe Lacroix  
Sébastien Lacroix-Desmazes  
D. Borden Lacy  
Dean Lacy  
Ryan Lacy  
Lara LaDage  
John Ladbury  
Andrea Ladd  
Bob Ladd  
Brenton Ladd  
Michael Ladegaard  
Nimzing Ladep  
Friedrich Ladich  
Ana Ladio  
Stephan Ladisch  
Andrew Ladle  
Jason Ladner  
Magalie Ladouceur  
Mary Jo LaDu  
Stephanie Læer  
Oliver Laeyendecker  
Virginie Lafage

Pierre Lafaye  
Rosa Lafer-Sousa  
Shawn Laffan  
Muriel Laffargue  
Kevin Lafferty  
John Laffey  
Susan E. LaFlamme  
Monique Lafon  
Kathryn Lafond  
Jerome Lafont  
Eric Lafontaine  
Yves Lafort  
Audrey Lafrenaye  
Benjamin Lafrentz  
William Lafuse  
Robert Lafyatis  
Marie Laga  
Erwann Lagabrielle  
Diane Lagace  
Thomas Lagace  
Neil Lagali  
Marina Laganaro  
Alfonso Lagares  
Joao Lagarto  
Linda Lagasse  
Claudia Lage  
Ricardo Lage  
Vincent Lagente  
Karin Lagesen  
Claire Lagesse  
Stephan Laggai  
Franco Laghi-Pasini  
Kamel Laghmani  
Joao Lago  
Francesco Lagona  
Carlos Lago-Pena  
Susanna Lagorio  
Nelson A. Lagos  
Doris Lagos-Kutz  
Chad LaGrange  
Paméla Lagrange  
Manuel Lagravere  
Mark Lagrimini  
Katrien Lagrou  
Clément Lagrue  
Fabiana Laguna  
Pablo Laguna  
Andres Laguna-Fernandez  
Ljerka Lah  
Bireswar Laha  
James Laham

Ian Lahart  
A. Lahat  
Yael Lahav  
Ismail Laher  
Vicente Lahera  
B. Lahey  
Timothy Lahey  
Kajal Lahiri  
Ramanuj Lahiri  
Soumen Lahiri  
Tim Lahm  
Salim Lahmiri  
Chloé Lahondère  
Lies Lahousse  
Agustin Lahoz  
Leo Lahti  
Robert Lahue  
Angeline Lai  
C. H. Lai  
Chengguang Lai  
Chien-Chen Lai  
Chih-Cheng Lai  
Ching-Shu Lai  
Chin-Hsing Lai  
Chi-Yu Lai  
Chou-Cheng Lai  
Chun-Fu Lai  
Chyh-Ming Lai  
Derrick Y.F. Lai  
Eric C.H. Lai  
Feipei Lai  
HuiChuan Lai  
Hung-Wen Lai  
Jonathan Lai  
Kuan-Lin Lai  
Lucy Lai  
Meng-Chuan Lai  
Ming-Derg Lai  
Ming-Wei Lai  
Mon Jou Lai  
Olimpia Lai  
Rachel Lai  
Samuel Lai  
Shengjie Lai  
Shen-Hao Lai  
Tai-Shuan Lai  
Te-Jen Lai  
Timothy Lai  
Tsung-Hsuan Lai  
Wai Lung Lai  
Wen Cheng Lai

Wenli Lai  
Xiaochun Lai  
Xinsheng Lai  
Yu Kay Lai  
Yu-Kuen Lai  
Evagelia Laiakis  
Rebekah Laidsaar-Powell  
Christian Laier  
Christopher Laine  
Carlo Laing  
Ingrid Laing  
William Lainhart  
Ines Lains  
Angela Laird  
David Laird  
Diana Laird  
Sue Laird  
Triin Laisk-Podar  
Dennis LaJeunesse  
Todd LaJeunesse  
Kate Lajtha  
Timo Lajunen  
Gabriella Lakatos  
Douglas Lake  
Jordan Lake  
Spencer Lake  
Daniël Lakens  
Nelly Lakestani  
Yihunie Lakew  
Laila Lakhali  
Samira Lakhali-Littleton  
T. N. Lakhanpal  
Naoufal Lakhassassi  
Subhash Lakhota  
Aparna Lakkaraju  
Cynthia Lakon  
Jeffrey Lakritz  
Dan Laks  
Madepalli Lakshmana  
Imayavaramban Lakshmanan  
Manu Lakshmanan  
D. Shanthana Lakshmi  
Sribalaji Lakshmikanthan  
Kamakshi Lakshminarayan  
Thangavel Lakshmipriya  
Laura Lakusta  
Ashish Lal  
B. Lal  
Geeta Lal  
Girdhari Lal  
Harbans Lal

Jawahar Lal  
Rup Lal  
Rahmi Lale  
Wim Laleman  
Hariharan Lalgudi  
Sarasi Lalithsena  
Patrice Lalive  
Kristi Lall  
Marco Lalle  
Enzo Lalli  
John Lally  
Alexis Lalouette  
Benjamin Lam  
Byron Lam  
Ching-Wan Lam  
Connie Lam  
Ernest Lam  
Hanh Lam  
Jenny Lam  
Phung Lam  
Sandi Lam  
Tommy Lam  
Ying Wai Lam  
Theresa Lamagni  
Fotini Lamari  
Trond Lamark  
Laurent Lamarque  
Jonathan LaMarre  
José Ramón Lamas  
Monica Lamas  
Ruben Lamas-Pinheiro  
Damon Lamb  
David Lamb  
Janine Lamb  
Sharon Lamb  
Tracey Lamb  
Daniel Lambert  
Elisabeth Lambert  
Lauren Lambert  
Nathalie Lambert  
Paul Lambert  
Stephen Lambert  
Thierry Lambert  
Walter Lambert  
Luca Lambertini  
Regis Lamberts  
Robert Lamberts  
Pia Lamberty  
Mark Lambie  
K.C. Lambirth  
Rob Lambkin-Williams

Olivier Lambotte  
Joeri Lambrecht  
Marcel Lambrechts  
Julia Lambret-Frotte  
Petar Lambrev  
Ariana Lambrides  
Irene Lambrinoudaki  
Dimitra Lambropoulou  
Raphael Lamed  
Adriano Lameira  
Ryan Lamers  
Rolf Lamerz  
Daniel Lametti  
Jay Ram Lamichhane  
Saneer Lamichhane  
Santosh Lamichhane  
Guillaume Lamirault  
Todd Lamitina  
Tobias Lammel  
Wim Lammers  
Patrick Lammie  
Dudley Lamming  
Christoph Lämmler  
Elise Lamont  
Iain Lamont  
Ruth Lamont  
Scott Lamont  
Susan Lamont  
Lucie Lamontagne  
R. Jason Lamontagne  
Kristopher Lamore  
Elizabeth Lamos  
Claudine Lamoth  
Frederic Lamoth  
Mark Lamotte  
Shona Lamoureaux  
Ecosse Lamoureux  
Francois Lamoureux  
Jed Lampe  
Paul Lampe  
Angelika Lampert  
Kirsten Lampi  
Thomas Lampoltshammer  
Vasileios Lamos  
Maria Grazia Lampugnani  
Amel Lamri  
Rosa Lamuela-Raventós  
Andre Lamurias  
Pierre-Jean Lamy  
Cheng-Che Lan  
Chung-Yu Lan

Ganhui Lan  
Keng-Hsin Lan  
Li Lan  
Weizhong Lan  
Yeqing Lan  
Zi-Jian Lan  
Susan Lana  
Michele Lanan  
Miguel Lanaspa  
Claudio Lanata  
Gwendolyn Lancaster  
Marcus Lance  
Stacey Lance  
Antonio Lancha  
Tiziana Lanciano  
Hovirag Lancioni  
Kenneth Land  
Mary Anne Land  
Ulf Landegren  
Rebecca Lander  
Timothy Landers  
Giora Landesberg  
Erik Landfeldt  
Stefan Landgraeber  
Dominic Landgraf  
Kathrin Landgraf  
Alessandro Landi  
Ana Marie Landin  
Paolo Landini  
Eric Landis  
Bennett Landman  
Neil Landman  
Cecilie Landmark  
Bruce Landon  
Federico Landriel  
John Landrum  
Gregory Landry  
Guillaume Landry  
Steven Landry  
David Landsberger  
Anne-Marie Landtblom  
Arthur Landy  
Michael Landy  
Alison Lane  
Jeffrey Lane  
Jerome Lane  
Joseph Lane  
Nancy Lane  
Sean Lane  
Steven Lane  
Timothy Lane

Tristan Lane  
Heinrich Lanfermann  
Gerolamo Lanfranchi  
Alex Lang  
Andrew Lang  
Carol Lang  
Frieder Lang  
Iain Lang  
Irene Lang  
James Lang  
Jillian Lang  
Joshua Lang  
Moritz Lang  
Muriel Lang  
Sinead Langan  
Chris Langdon  
Christopher Langdon  
Simon Langdon  
Angela Lange  
Anke Lange  
Christian Lange  
Dale Lange  
Denise Lange  
Jens Lange  
Johannes Lange  
Katharina Lange  
Lene Lange  
Miles Lange  
Tobias Lange  
Vinzenc Lange  
Carl Langefeld  
Geeske Langejans  
Ralph Langen  
Christopher Langendorf  
Harald Langer  
Max Langer  
Nicolas Langer  
Nelleke Langerak  
Christelle Langevin  
Helene Langevin  
Dianne Langford  
Paul Langford  
Terry Langford  
Alexander Langford-Smith  
Peter Langguth  
Morgan Langille  
Kathryn Langin  
Philip Langlais  
Keith Langley  
Ray Langley  
Sean Langley

Marc-André Langlois  
Ryan Langlois  
Craig Langman  
Cord Langner  
Marek Langner  
Soenke Langner  
Sophie Langouet  
Georg Langs  
Lisa Langsetmo  
Rosamund Langston  
Christian Langton  
Stephen Langton  
Kate Langwig  
Jessica Lanini  
Ruth Lanius  
David Lank  
Kamran Lankarani  
Jason Lanman  
Gisela Lannig  
Donald Lannin  
Michael Lannoo  
Marianna LaNoue  
Van Lansingh  
Beate Lanske  
Daniele Lantagne  
Fanny Lanternier  
Paul Lantos  
Olivier Lantz  
Alessandra Lanubile  
Sasha Lanyon  
Gaetano Lanza  
Giacomo Lanza  
Rupert Lanzenberger  
Giuseppe Lanzino  
Giordano Lanzola  
Lifeng Lao  
Oscar Lao  
Terence Tzu-Hsi Lao  
Wongsa Laohasiriwong  
Damy Laoui  
Marie-Eve Lapalme  
Nicolas Lapaque  
Timothy LaPara  
Scott LaPatra  
Paul Lapchak  
Syria Laperche  
Suzanne Lapi  
Moshe Lapidot  
Oriol Lapiedra  
Stephen Lapinsky  
Michelle LaPlaca

Laurent Laplaze  
Scott LaPoint  
Paul LaPointe  
Lauren Lapointe-Shaw  
Thomas Lapole  
Marinella Laport  
Jimena Laporta  
Rosaria Laporta  
Martin Laporte  
Rosamaria Lappano  
Martha Lappas  
Therese Lapperre  
Otto Lappi  
Robert LaPrade  
James Lara  
Lúcia Lara  
Jason Larabee  
Pablo Lara-Gonzalez  
Matthew Laramie  
Muriel Larauche  
Oscar Lara-Velasco  
Alfred Lardizabal  
Philip Larese-Casanova  
Matthew Large  
Etienne Larger  
Christine Largeron  
Martina Lari  
Kirill Larin  
Vladimir Larionov  
Markku Larjavaara  
Bob Larkin  
Celine Larkin  
Joseph Larkin  
Lisa Larkin  
Joseph Larkin III  
Anthony Larkum  
Jan Larmann  
S. Larney  
Andre Laroche  
Marc LaRoche  
Louise Larose  
M.E. Larraga  
Ricardo Larrainzar-Garijo  
Hernan Larralde  
Adriana Larregina  
Daniel Larremore  
Veronique Larreta-Garde  
Antoine Larrieu  
Pierre Larrivee  
Gérald Larrouy-Maumus  
Johan Larsbrink

Anders Larsen  
Erik Larsen  
Junilla Larsen  
Mark Larsen  
Melinda Larsen  
Michael Larsen  
P. Larsen  
Peter Larsen  
Randy Larsen  
Sofus Larsen  
Andrew Larson  
Brendon Larson  
Elaine Larson  
Elysia Larson  
Eric Larson  
Heidi Larson  
Julie Larson  
Michael Larson  
Nicholas Larson  
Paul Larson  
Peder Larson  
Shawn Larson  
Timothy Larson  
Anders Larsson  
Elin Larsson  
Ellen Larsson  
Elna-Marie Larsson  
Jonas Larsson  
Lotta Larsson  
Maria E.H. Larsson  
Mikael Larsson  
Per-Göran Larsson  
Margaret Lartey  
Bruno Lartiges  
Michelle LaRue  
Lillebeth Larun  
Tiziana Larussa  
Roberta Lasagna  
Laura Lasagni  
Janine LaSalle  
Cesar Lascala  
Cecilia Laschi  
Ion Lascurain  
Victor Lasebikan  
Lawrence Lash  
Tamás Laskay  
Judith Lasker  
B.L. Laskin  
Kristofer Lasko  
Daniel Laskowitz  
Marta Laskowski

Stephen Lasley  
Amandine Lassalle  
Francesco Lassandro  
Andrew Lassar  
William Lassek  
Jesper Lassen  
Gorka Lasso  
Mariano Lastra  
Elena Lasunskaja  
Linda Lasure  
Sarah Laszlo  
Charu Lata  
Matthieu Latapy  
Maria Ujue Latasa  
Giovanni Latella  
Howard Laten  
John Laterra  
Jean-Paul Latge  
Jeremy Latham  
Kenzie Latham  
Wyndham Lathem  
Vinny Lather  
Justin Lathia  
Saeed I. Latif  
Amel Latifi  
Alice Latinne  
Guillaume Latombe  
Vito Latora  
Ramon Latorre  
Paulina Latos  
Agnieszka Latosinska  
Steven Latosinsky  
Lawrence Latour  
Augustin Latourte  
Perle Latre de Late  
Alban Latremoliere  
David Lattanzi  
Frank Lattanzio  
Susan Latter  
Jean-Baptiste Lattouff  
Tatiana Latychevskaia  
Vit Latzel  
Yael Latzer  
Aik Jiang Lau  
Bonnie K. Lau  
Calvin Ho-Fung Lau  
Candy C. Y. Lau  
Christopher Lau  
Colleen Lau  
Darryl Lau  
Eric Lau

Esther Y.Y. Lau

Frank Lau

Gee Lau

Hang Lau

Kwok-Fai Lau

Laurie Lau

Loretta Lau

Melisa Lau

Phyllis Lau

Sue Mei Lau

Susanna K. P. Lau

Wayne Bond Lau

Wei Ling Lau

Chris Lauber

Christian Lauber

Agne Laucyte-Cibulskiene

Augustinus Laude

Vincent Laudenbach

Tsai-Ling Lauderdale

Vincent Laudet

Cheyenne Laue

Jeannet Lauenborg

Antje Lauer

Michael Lauer

Daniel Laufer

Miriam Laufer

Shlomi Laufer

Beatrice Lauga

Ane Laugen

Ruple Laughlin

Kathryn Laughon

Pascal Laugier

Charles Lauhon

Christina Laukaitis

Sandrine Launois

Juliano Laura

Martincich Laura

Raphaelle Laureau

Endres Lauren

Martin Laurence

Cato Laurencin

Kristin Laurens

Matthew Laurens

Alexandre Laurent

Arnaud Laurent

Catherine Laurent

Louise Laurent

Luca Laurenti

Sandra Laurentino

Douglas Laurents

Fulvio Lauretani

Matthew Lauretta

Gordon Laurie

Nikia Laurie

Anssi Laurila

Diana Laurillard

Kristin Laurin

Michel Laurin

Marco Laurino

Chiara Lauritano

Davide Lauro

Karsten Laursen

Lisbeth Laursen

Martin Laursen

Torben Laursen

Volker Lauschke

Ludwig Lausser

Christoffer Laustsen

Jeffrey Laut

Tim Lautenschlaeger

Matthias Lauth

Sylvie Lautru

Lena Lautscham

Dale Lauver

Hady Lauw

Peter Laux

Philippe Laval

Blas Lavandero

Sergio Lavandero

Patricia Lavand'homme

Mitra Lavasani

Johann Lavaud

Catherine Lavazec

Garry Laverty

Gary Laverty

Gareth Lavery

James Lavery

Richard Lavery

Enrico Lavezzo

Hugo Laviada

Alessandro Laviano

Arnon Lavie

Eric Lavigne

Pierre Lavigne

Gaute Lavik

Maurice Laville

Martin Lavin

Daniel Lavinsky

Luigi Laviola

Matthew LaVoie

Suzie Lavoie

Anne-Violette Lavoit

Peter Lavrentyev  
Inna Lavrik  
Harish Lavu  
Adi Lavy  
Barbi Law  
Darin Law  
Mansun Law  
Yuen Kwan Law  
Alfons Lawen  
Mary Lawhon  
Joshua Lawler  
Patrick Lawler  
Sean Lawler  
Nicole M. Lawless DesJardins  
Andrew Lawrence  
Chip Lawrence  
Christian Lawrence  
Elizabeth Lawrence  
John Lawrence  
Melanie Lawrence  
Michael Lawrence  
Paulraj Lawrence  
Shelley Lawrence  
Susan Lawrence  
John Lawrenson  
Kate Lawrenson  
Nathan Lawrentschuk  
Brabara Lawrenz  
Matthew Lawrenz  
Edward Laws  
Michael Laws  
Becki Lawson  
Brian Lawson  
Julia Lawson  
Michelle Lawson  
Paul Lawson  
Peter W. Lawson  
Robert Lawton  
Glenn Lawyer  
Simon Lax  
Sunil Laxman  
Michael Laxy  
Fides Lay  
Suzanne Laychock  
Brian Layden  
Siddhartha Layek  
Lester Layfield  
Georg Layher  
Laura Layland  
Curtis Layton  
Adina Lazar

Alexander Lazar  
Nicole Lazar  
Peter Lazarakis  
Vassili Lazarev  
Ljiljana Lazarevic  
Asimina Lazaridou  
Amparo Lazaro  
Luisa Lázaro  
Cathy J. Lazarus  
Philip Lazarus  
Sophie Lazarus  
Cristina Lazcano  
Helen Lazear  
Žiga Laznik  
Lambros Lazuras  
Chiara Lazzari  
Lorenza Lazzari  
Vincent Lazzari  
Brian Lazzaro  
Douglas Lazzaro  
Cheng Foh Le  
Dao Khanh Long Le  
Phuc Le  
T.T. Yen Le  
Thuc Le  
Trung Le  
Yun Le  
Yoann Le Bagousse-Pinguet  
Sophie Le Bellu  
Anne-Pascale Le Berre  
Sylvie Le Bomin  
Lionel Le Bourhis  
Yoann Le Breton  
Florence Le Calvez-Kelm  
Steven Le Cam  
Yann Le Cunff  
Joost le Feber  
Christelle Le Foll  
Grégoire Le Gal  
Maude Le Gall  
Sylvain Le Gall  
Gaelle Le Goff  
Ronan Le Goffic  
Jacques Le Gouis  
Fabienne Le Grand  
Xavier Le Guével  
Richard Le Heron  
Isabelle Le Huërou-Luron  
Mona Le Luyer  
Olivier Le Maitre  
Jean-Claude Le Mevel

Alain Le Moine  
Catherine Le Moine  
Vincent Le Moing  
Hervé Le Moual  
Olivier le Polain de Waroux  
I. Le Poole  
Jean Yves Le Reste  
Virginie Le Rolle  
Muriel Le Romancer  
Carel Le Roux  
Peter le Roux  
Marion Le Texier  
Florent Le Ven  
Isabelle le Viol  
Janice Lea  
Amanda Leach  
David Leach  
Jennie Leach  
Katie Leach  
Matthew Leach  
Jim Leafloor  
Erin Leahey  
Rehana Leak  
Daniela Leal  
Manuel Leal  
Rodrigo Leal  
Soraya C. M. Leal-Bertiol  
Ernesto Cesar Leal-Junior  
Ian Lean  
Michael Lean  
Roger Léandri  
Vânia Aparecida Leandro-Merhi  
Luigi Leanza  
Sylvia Leão  
Michael Leapman  
Alberto Leardini  
Christopher Learn  
Mark Leary  
Eric Leas  
Hilary Lease  
Francesca Leasi  
Andrew Leask  
David Lea-Smith  
J. Leigh Leasure  
Simon Leather  
David Leavens  
Michael Leaver  
Gerard Leavey  
Patrick Leavey  
Joanna Leaviss  
Camille Lebarbenchon

Simon Lebaron  
Fiona LeBeau  
Richard LeBeau  
Aleksandra Lebedeva  
Iryna Lebedyeva  
Sarah Lebeis  
Alexandre Lebel  
Sarah Lebel  
Bettina Leber  
Limakatso Lebina  
Normand Leblanc  
Pascal Leblanc  
Paul LeBlanc  
Roger M. Leblanc  
Arthur Leblois  
Matthew Lebo  
Fabien Leboeuf  
Florent Lebon  
Vincent Lebot  
Nicolas Leboulanger  
Muriel Lebourgeois  
Jill Lebov  
Adam Jon Lebowitz  
Nathan LeBasseur  
Mario Lebrato  
Carlito Lebrilla  
Christine Lebrun  
Ivo Lebrun  
Maryse Lebrun  
Renaud Lebrun  
Fernando Lecanda  
Yara Lechanteur  
André Lechel  
Claude Lechene  
Shirley Lecher  
James Lechleiter  
P. Lechler  
Michael Lecholop  
Aron Lechtig  
Jill Leckey  
Grégoire Leclair  
Estelle Leclerc  
Nicole Leclerc  
Alexandre Leclercq  
Florence Leclercq  
Sébastien Leclercq  
Lucas Leclère  
Chloe Lecoq  
Magalie Lecourtois  
Frédéric Lecouvet  
Ramón Lecumberri

Valérie Lecureur  
Farideh Ledari  
Helmut Leder  
Karin Leder  
Eleanor Lederer  
James Lederer  
Ruben Ledesma  
John Lednicky  
Jonathan Ledoux  
Kerry Ledoux  
Alan Yueh-Luen Lee  
Albert Lee  
Aline Lee  
Arier Chi Lun Lee  
Ashlynn Lee  
Baek-Seok Lee  
Barry Lee  
Benhur Lee  
Benjamin Lee  
Beth Lee  
Brian Lee  
Byong Lee  
Byung Lee  
Chang Lee  
Chang Hee Lee  
Changan Lee  
Chao-Yang Lee  
Charles Tzu Chi Lee  
Che-Hsin Lee  
Cheng-Chi Lee  
Cheng-Chung Lee  
Cheng-I Lee  
Cheuk Kwong Lee  
Chiachi Bonnie Lee  
Chia-Hwa Lee  
Chia-Jung Lee  
Chien-Kuo Lee  
Chien-Nan Lee  
Chien-Te Lee  
Chih Lee  
Chih-Hao Lee  
Chih-Hsin Lee  
Chih-Hung Lee  
Chioun Lee  
Chi-Ying Lee  
Choong Hwan Lee  
Choong-Eun Lee  
Christina Lee  
Christopher Lee  
Chun Yi Lee  
Dae Ho Lee

Danbi Lee  
Daniel Lee  
Darren Lee  
Desy Lee  
Do Yup Lee  
Dong Ho Lee  
Dong Wan Lee  
Dongkuk Lee  
Dong-Yup Lee  
Douglas Lee  
Duk-Hee Lee  
Eng Hin Lee  
Eun Kyung Lee  
Eun-Jig Lee  
Gabsang Lee  
Geun-Shik Lee  
Hae-Jeung Lee  
Harry Lee  
Hey-Kyoung Lee  
Ho Joung Lee  
Ho Seong Lee  
Hon Lee  
Howon Lee  
Hsiang-Chieh Lee  
Hsuan-Shu Lee  
Hyang Woon Lee  
Hye Seung Lee  
Hye Won Lee  
Hyung Chul Lee  
Hyunhwa Lee  
I-Cheng Lee  
I-Chi Lee  
Ik Jae Lee  
In Su Lee  
Iris Lee  
Jae Cheol Lee  
Jae Gil Lee  
Jae Wook Lee  
Jae-Hyung Lee  
Jae-Kyung Lee  
Jaeseong Lee  
James Lee  
Janet Lee  
Janice Lee  
Jay Lee  
Jean Lee  
Jeannette Lee  
Jeffery Lee  
Jeong-Hoon Lee  
Jeonghun Lee  
Jia-Jung Lee

Jih-Hsiang Lee  
Jin-Ching Lee  
Jinseok Lee  
Jinwoo Lee  
John Lee  
Jong-Koo Lee  
Jongmin Lee  
Jongsoon Lee  
Joo Yong Lee  
Joo Young Lee  
Joon Lee  
Joo-Yong Lee  
Joy Lee  
Julian Lee  
Jun Lee  
Jun Hee Lee  
Jung-Hoon Lee  
Jung-Kul Lee  
Jungkwan Lee  
Jungnam Lee  
Junhee Lee  
Junsoo Lee  
Kang-Yun Lee  
Keun Hwa Lee Lee  
Kevin Lee  
Kheng Hock Lee  
Kichun Lee  
Kiho Lee  
Kuei-Chuan Lee  
Kwang Ho Lee  
Kwang Pum Lee  
Kwangwon Lee  
Kwonmoo Lee  
Kyongbum Lee  
Kyu-Ho Lee  
Kyung-Min Lee  
Kyungwon Lee  
Li-Ang Lee  
Lik Chuan Lee  
Marianne Lee  
Mei-Hsien Lee  
Mei-Hsuan Lee  
Mei-Yueh Lee  
Mi Ji Lee  
Michael Lee  
Miin-Huey Lee  
Mike Lee  
Min Geol Lee  
Min Goo Lee  
Ming-Been Lee  
Ming-Ching Lee

Ming-Jen Lee  
Ming-Shinn Lee  
Ming-Shyue Lee  
Minjin Lee  
Moo Hyun Lee  
Myeongwoo Lee  
Myung-Shin Lee  
Natuschka Lee  
Ni-Chung Lee  
Nikki Lee  
Nora Lee  
Oscar Lee  
P. Lee  
Patrick Lee  
Paul Lee  
Pei-Chang Lee  
Pei-Lin Lee  
Peter Lee  
Phyllis Lee  
Po-Shun Lee  
R.K. Lee  
Randall Lee  
Robert Lee  
Robin Lee  
S. Lee  
Sa Ra Lee  
Samuel Lee  
Sandra Lee  
Sang Lee  
Sang Eun Lee  
Sang Hyun Lee  
Sang Jin Lee  
Sanghee Lee  
Sangheun Lee  
Sangho Lee  
Sanghoon Lee  
Sangkyu Lee  
Sang-Myeong Lee  
Sang-Rae Lee  
Sean Lee  
Seok-Yong Lee  
Seong-Whan Lee  
Seung Duk Lee  
Seung Heon Lee  
Seung-Ju Lee  
Shaun Lee  
Shin Yin Lee  
Shyh-Jye Lee  
So Hee Lee  
Soo Lee  
Soo Chan Lee

Soomin Lee  
Spike Lee  
Su Seong Lee  
Sue Lee  
Sukhyang Lee  
Sun Hee Lee  
Sung Chul Lee  
Sung Kuk Lee  
Sung-Ho Lee  
Sung-Jae Lee  
Sungkyu Lee  
Sun-Kyeong Lee  
Sylvia Lee  
T. H. Lee  
Tack Lee  
Tae Lee  
Taek Lee  
Teng-Yu Lee  
Theresa Lee  
Tian-Ren Lee  
Tse-Min Lee  
Tsong-Hai Lee  
Tsong-Han Lee  
Tsong-Ming Lee  
Tzong-Shyuan Lee  
Vincent Lee  
W. Lee  
Wai-Nang Paul Lee  
Wei-Ju Lee  
Wen-Chung Lee  
Wendy Lee  
Wen-Ying Lee  
Weon-Young Lee  
Wing-Kee Lee  
Won Ki Lee  
Wonchoel Lee  
Wonik Lee  
Won-Joon Lee  
Wooin Lee  
Woo-Kyun Lee  
Y. Lee  
Yi Chen Lee  
Yi-Chia Lee  
Yi-Chung Lee  
Yong Lee  
Yong-Hwan Lee  
Yoo Kyung Lee  
Yoonkwang Lee  
Young Ho Lee  
Yueh Lee  
Yuong-Nam Lee

Yu-Shang Lee  
Zarraz Lee  
Edwin Leeansyah  
Christine Leeb  
Tosso Leeb  
Michelle Leech  
Stephen Leeder  
Simon Leedham  
Daniel Leeds  
Jong Han Leem  
Lawrence Leeman  
William Leenders  
Celine Leenen  
Frans Leenen  
Alon Leeor  
Elisabeth Leermakers  
Jessica Leers  
Alexander Lees  
David Lees  
Rosemary Lees  
Julia Lee-Thorp  
Christiaan Leeuwenburgh  
S. Leeuwenburgh  
Chen Lee-Wei  
Alice Lefebvre  
Francine Lefebvre  
J r mie Lefebvre  
Jonas Lefevre  
Carmen Lefevre  
Jo-Anne LeFevre  
Sarah LeFevre  
Alexander Leff  
Todd Leff  
Hyam Leffert  
Lisa Leffert  
Jonatan Leffler  
Ivan Lefkovits  
Marie-Caroline Lefort  
Avigdor Leftin  
Cecile Legallais  
Sandra Legan  
Cristine Legare  
Fr d ric Legendre  
Bertrand Leger  
James Legg  
Francesco Legge  
Kevin Legge  
Justin Legleiter  
Patricia Legler  
Tobias Legler  
Benoit LeGoff

Jean-Luc Legras  
Stephane Legriél  
Alexander Legwegoh  
V'yacheslav Lehen'kyi  
Jean-Yves Lehesrand  
Tanya Lehky  
Joel Lehman  
Jon Lehman  
Michael Lehman  
Vance Lehman  
Birthe Lehmann  
Edouard Lehmann  
Helmar C Lehmann  
Hugo Lehmann  
Michael Lehmann  
Roger Lehmann  
Sylvain Lehmann  
Wolfgang Lehmann  
Klaus Lehmann-Horn  
Markus Lehmkuhl  
Paul Lehner  
Linn Sophia Lehnert  
Martin Lehnert  
Erik Lehnhoff  
Edgar Lehr  
Stefan Lehr  
Laura Lehtinen  
Samuli Lehtonen  
Sanna Lehtonen  
Mikko Lehtovirta  
Bo Lei  
Chao-Liang Lei  
Chengwei Lei  
Chu-Zhao Lei  
Guang-Hua Lei  
Hao Lei  
Hong Lei  
Hongxing Lei  
Kai Lei  
Minggang Lei  
Peng Lei  
Shufeng Lei  
Xia Lei  
Xiaoying Lei  
Xin Gen Lei  
Xinglin Lei  
Yu Lei  
Zhen Lei  
Zhenmin Lei  
Zhigang Lei  
Margarita Leib

Raz Leib  
Eric Leibert  
Jessica Leibler  
Elizabeth Leibold  
Eugene Leibovitz  
Arleen Leibowitz  
Gregor Leibundgut  
James Leichter  
Andrew Leidner  
Maren Leifheit-Nestler  
Andreas Leihörer  
Ralph Leijenaar  
Patty Leijten  
George Leikauf  
Peter Leimgruber  
Ed Lein  
Trese Leinders-Zufall  
Marie Leiner  
Olof Leinhard  
Ville Leinonen  
Enrico Leipold  
Claudia Leiros  
Jonathan Leis  
Tanya Leise  
Malcolm Leissring  
Ana Lúcia Leitão  
Jorge Leitão  
Victoria Leitch  
Marcio Leite  
Maria Leite  
Maria Isabel Leite  
Nuno Leite  
Lucas Leite Cunha  
Ed Leiter  
Jürgen Leitner  
Stefan Leitner  
Thomas Leitner  
Andrea Leiva  
Tomás Lejarraga  
Fabrice Lejeune  
Veerle Lejon  
Michel Lejoyeux  
Evgeny Lekchnov  
Malgorzata Lekka  
Marilena Lekka  
Arne Lekven  
Pushkar Lele  
Tanmay Lele  
Frederik Leliaert  
Irene Lelieveld  
Jean-Daniel Lelievre

Sophie A. Lelievre  
Chiara Lelli  
Sophie Lelorain  
Julie Leloup  
Benjamin Lelouvier  
A. Titia Lely  
Gareth M. Lema  
Valerie Lemaine  
Christophe Lemaire  
Edward D. Lemaire  
Patrick Lemaire  
Jean-François Lemaitre  
Dominick Lemas  
Isabelle Lemasson  
Matthew Lemay  
Giuseppe Lembo  
Ludovic Lemée  
Tagrid Lemenager  
Marieke Lemiengre  
Isabelle Lemieux  
Joseph Lemire  
Michael Lemke  
Ney Lemke  
Kevin Lemley  
Eshetu Lemma  
Joelle Lemmen  
Robin Lemmens  
Trudo Lemmens  
Gunnar Lemmer  
Florian Lemmerich  
Frederic Lemoine  
Sandrine Lemoine  
Gerald Lemole  
Roberto Lemoli  
Jim Lemon  
Francois Lemonnier  
Carlos Lemos  
Eliana Lemos  
Pedro Lemos  
Robert LeMoyne  
Cynthia Lenaerts  
Brigita Lenarcic  
Rebekka Lencer  
Heather Lench  
Chuan Leng  
Gareth Leng  
Huijie Leng  
Qibin Leng  
Roger Leng  
Shuguang Leng  
Xiangjun Leng

Yue Leng  
Etienne Lengline  
Michael Lenhard  
Audrey Lenhart  
Gustavo Lenis  
Balint Lenkei  
Jenny Lenkowski  
Cleridy Lennert-Cody  
Alex Lennon  
Frances Lennon  
Rachel Lennon  
Jeffrey Lennox  
Matthieu Lenoir  
Maxime Lenormand  
Marc Lensink  
Alex Lentsch  
Hartmut Lentz  
Michael Lentze  
Jack Lenz  
Mark Lenz  
Peter Lenz  
Petra Lenz  
Sigurd Lenzen  
Jack Leo  
Lisa Leon  
Oscar Leon  
Paul Leon  
Anthony Leonard  
Christopher Leonard  
Hayley Leonard  
Jennifer Leonard  
Laurence Leonard  
Paul Leonard  
Warren Leonard  
Stefano Leonardi  
Jo Leonardi-Bee  
Margareta Leonardsson-Hellgren  
Gabriella Leonarduzzi  
Alfonso León-Del-Río  
Alessandro Leone  
Umberto Leone Roberti Maggiore  
Christine Leong  
Darryl Leong  
Fong Yew Leong  
Kelvin Leong  
Lex Leong  
Michael Leong  
Susanna Leong  
Howard Leong-Poi  
Ralf Leonhardt  
Carolina Leoni

Lara Leoni  
Isabel Leonor  
Vladimir Leon-Salazar  
Marco Leonti  
Georgios Leontidis  
Bruce Leopold  
Christine Leopold  
Jane Leopold  
Mardik Leopold  
Dario Leosco  
Marco Leotta  
Jean-François Lepage  
Martin Lepage  
Malgorzata Lepczynska  
Antonio Lapedda  
Bernard Lepetit  
Konstantin Lepikhov  
Angelo Lepore  
Domenico Lepore  
Benedetto Lepori  
Andrew Lepp  
Jenni Leppanen  
John Leppert  
Phyllis Leppert  
Fabien Leprieur  
Corinne Leprince  
Olivier Leprince  
Anais Leproux  
Thierry Lequerre  
Emmanuelle Leray  
Alexander Lerch  
Jessica Lerch  
Holger Lerche  
Trond Leren  
Marja-Kristiina Lerkkanen  
Maria Lerm  
Amir Lerman  
Lilach Lerman  
Nancy Lerner  
Seth Lerner  
Ulf Lerner  
Anne-Marie Leroi  
Iracema Leroi  
Tanya LeRoith  
Nicolas Lerolle  
Olivier Leroux  
Carri LeRoy  
O. Leroy  
Sandrine Leroy  
Amnon Lers  
Noppon Lertwattanasakul

Unax Lertxundi  
Florian Lesage  
Claude LeSaux  
David Lesbarrères  
Roxana Lescano  
Halard Lescinsky  
Mylene Lesenechal  
Ulf Leser  
Alan Lesgold  
Eyal Leshem  
Olivier Lesieur  
Clémence Lesimple  
Katarzyna Leskinen  
Alasdair Leslie  
Elizabeth Leslie  
Ken Leslie  
Wieslawa Lesniak  
Philippe Lesnik  
Saskia Lesnik Oberstein  
Hervé Lesot  
Christopher Lessard  
Samuel Lessard  
Laurence Lessard-Phillips  
Heidi M.B. Lesscher  
Alan Lesse  
Richard Lessells  
Glenn Lesser  
Iris Lesser  
Daniel Lessner  
Lawrence Lessner  
Susan Lessner  
Henry Lester  
Mark Lester  
Sarah Lester  
Emilio Letang  
Peter Letcher  
Juan-Carlos Letelier  
Elisabeth Letellier  
Jean-Jacques Letesson  
Craig Leth-Steensen  
Mike Letnic  
Gaetano Leto  
Yves Letourneur  
Anthea Letsou  
Christophe Lett  
Philippe Letteron  
Guillaume Lettre  
Jiann Horng Leu  
Shao-Yuan Leu  
Nicolas Leuenberger  
Pedro Leunda

Angela Leung  
Anskar Leung  
Carson K. Leung  
Hoi-Chung Leung  
Howard Leung  
Jacqueline Leung  
Janice Leung  
Janni Leung  
Johahn Leung  
June Leung  
Justin Leung  
Lai Yee Leung  
Lawrence Leung  
Marcus Leung  
Mark Leung  
Ming-Ying Leung  
Nicki Leung  
P.C. Leung  
Patrick Leung  
Sharon Leung  
Susan Leung  
Tin Leung  
Ting Fan Leung  
Tommy Leung  
Victor Leung  
Wai Leung  
Yuet-Kin Leung  
Baptiste Leurent  
Florian Leuschner  
Hartmut Leuthold  
Heather Leutwyler  
Henri Leuvenink  
Vincenzo Leuzzi  
Sima Lev  
Ernesto Leva  
Kateryna Levada  
Katherine E. Levan  
Sonja Levanat  
Erez Levanon  
Beth Levant  
Stephen Levas  
Eylem Levelt  
Alytia Levendosky  
David Levens  
Vasiliki Leventakou  
Vicky Leventakou  
Jean Leveque  
Nicolas Leveque  
Friedhelm Leverkus  
Eric Levesque  
Jean Pierre Levesque

Maxime Levesque  
Mitch Levesque  
Amnon Levi  
Benjamin Levi  
Edi Levi  
José Levi  
Marinella Levi  
Sonia Levi  
Taal Levi  
Valeria Levi  
Yossi Levi-Belz  
Jorge Levican  
Scott Levick  
Yuri Levik  
Adeera Levin  
Barry Levin  
Carina Levin  
Carol Levin  
Harvey Levin  
Lisa Levin  
Oron Levin  
Petra Levin  
Rachel Levin  
Aaron Levine  
Adam Levine  
Benjamin Levine  
Brenna Levine  
Brett Levine  
Edward Levine  
Jon Levine  
Lisa D. Levine  
Martin Levine  
Steven Levine  
Todd Levine  
Randall Levings  
David Levinson  
Jeffrey Levinton  
Brooke Levis  
Francesca Levi-Schaffer  
Judy Levison  
Zoe Leviston  
Irena Levitan  
Orly Levitan  
David Levitsky  
Bodo Levkau  
Zlatko Levkov  
Zoran Levnajic  
Anna-Liisa Levonen  
Liat Levontin  
Jacques Levraut  
Florence Levréro

Luca Levrini  
Elena Levtchenko  
Ariel Levy  
Avram Levy  
Becca Levy  
Benjamin Levy  
Bruce Levy  
Corinne Levy  
David Levy  
Doron Levy  
Estrella Levy  
Gary Levy  
Marc Levy  
Michael Levy  
Mitchell Levy  
Nadav Levy  
Oren Levy  
Philip Levy  
Sary Levy  
Steven Levy  
S. Levy-Tzedek  
Jie-Bin Lew  
Michael Lew  
Eric Lewallen  
Eva Lewandowski  
Jorg Lewandowski  
Gregory Lewbart  
Pawel Lewek  
Shawn Lewenza  
Susanna Lewerin  
Astrid Lewin  
Sarah Lewington  
Amanda Lewis  
Bryan Lewis  
Cara Lewis  
David Lewis  
Janina Lewis  
Joanna Lewis  
Joshua Lewis  
Kathleen Lewis  
Kemper Lewis  
Lawrence Lewis  
Lynn Lewis  
Margaret Lewis  
Martin Lewis  
Mary Catherine Lewis  
Michael Lewis  
Rohan Lewis  
Sheena Lewis  
Simon Lewis  
Valerae Lewis

Warren Lewis  
Zachary Lewis  
Zachery Lewis  
Grant Lewison  
Rebecca Lewison  
Maxim Lewkowski  
Joseph Lewnard  
Joanne Lewohl  
Alexandra Ley  
Benedikt Ley  
Ruth Ley  
Serej Ley  
Sylvia Ley  
Luc Leybaert  
Loet Leydesdorff  
Ciara Leydon  
Werner Leyh  
Dieter Leyk  
Stefan Leyk  
Alastair Leyland  
David Leys  
Eugene Leys  
Misti Leyva  
Victor Leyva-Grado  
Juan Leza  
Claudio Lezama-Davila  
Frank Lezoualc'h  
Thibault Lhermusier  
Nicolas L'Heureux  
Monique L'Hoir  
Lenka Lhotska  
Karl Lhotta  
Arnaud L'Huillier  
Aihua Li  
Ai-Jun Li  
An Li  
Anan Li  
Ang Li  
Angsheng Li  
Annan Li  
An-Wei Li  
Bai-Yan Li  
Baocai Li  
Baojuan Li  
Baolei Li  
Baolin Li  
Benyi Li  
Bichun Li  
Bin Li  
Bing Li  
Bingjin Li

Bingshan Li  
Bingxue Li  
Bingyun Li  
Bo Li  
Bob Li  
Chang Xian Li  
Changchun Li  
Changwei Li  
Changzheng Li  
Chao Li  
Chaoyang Li  
Chen Li  
Chenghua Li  
Cheng-Qing Li  
Chengtao Li  
Cheng-Yun Li  
Chia-Cheng Li  
Chia-Lin Li  
Chia-Yang Li  
Chi-Yuan Li  
Chunfeng Li  
Chung-Pin Li  
Chunhao Li  
Chunhua Li  
Chunming Li  
Chunyan Li  
Cun Li  
Da Li  
Daijiang Li  
Daiqin Li  
Danielle Li  
Danni Li  
Dapeng Li  
Dawei Li  
Dayong Li  
De-Hua Li  
Dejun Li  
Dezhi Li  
De-Zhu Li  
Dong Li  
Dongmei Li  
Dongsheng Li  
DongYe Li  
E. Li  
Ellen Li  
Erchao Li  
Fa-Jun Li  
Fan Li  
Fei Li  
Feng Li  
Fengna Li

Fengri Li  
Fuhong Li  
Gang Li  
Ge Li  
Gen Li  
Gordon Li  
Guang Li  
Guangbin Li  
Guangye Li  
Guibing Li  
GuoDong Li  
Guohui Li  
Guojun Li  
Guoping Li  
Guoqing Li  
Guorong Li  
Hai Li  
Haichang Li  
Haihong Li  
Haipeng Li  
Haitao Li  
Haiyun Li  
Hang Wun Raymond Li  
Haobo Li  
Hao-Sen Li  
He Li  
Henan Li  
Heng Li  
Henghong Li  
Ho Cheung William Li  
Hong Li  
Hong-Fu Li  
Hongge Li  
Hongjiao Li  
Hongju Li  
Honglang Li  
Hong-Li Li  
Honglian Li  
Hongliang Li  
Hong-Sheng Li  
Hong-Tao Li  
Hong-Ye Li  
Hongyi Li  
Hongzhe Li  
Hu Li  
Hua Li  
Huabin Li  
Huadl Li  
Huaqing Li  
Hui Li  
Huiguang Li

Huihua Li  
Hui-Jie Li  
Huirong Li  
Huixin Li  
Huiying Li  
James J. Li  
Jia Li  
Jia-Da Li  
Jiale Li  
Jiali Li  
Jiamei Li  
Jian Li  
Jianfeng Li  
Jianhong Li  
Jiani Li  
Jian-Jun Li  
Jian-Ming Li  
Jianxiong Li  
Jianyong Li  
Jiaqi Li  
Jiarui Li  
Jia-Tang Li  
Jiawen Li  
Jiaxu Li  
Jie Li  
Jih-Heng Li  
Jiliang Li  
Jin Li  
Jinchen Li  
Jing Li  
Jing Jing Li  
Jinghua Li  
Jingyi Jessica Li  
Jinhua Li  
Jinjun Li  
Jinpeng Li  
Jinping Li  
Jinrong Li  
Jisu Li  
Juan Li  
Judy (Yaqin) Li  
Jun Li  
Junming Li  
Junsheng Li  
Kaccie Li  
Kaiming Li  
Ke Li  
Laifang Li  
Lan Li  
Lanjuan Li  
Lei Li

Li Li  
Liang Li  
Lianhui Li  
Lihua Li  
Li-Hua Li  
Lihui Li  
Lijia Li  
Liming Li  
Lin Li  
Lin-Feng Li  
Ling-Hui Li  
Ling-Jun Li  
Linyan Li  
Liping Li  
Long Li  
Lulin Li  
Mai Suan Li  
Man-Wah Li  
Maoteng Li  
Mei Li  
Meng Li  
Meng-Hua Li  
Menghui Li  
Mengjiao Li  
Miaoxin Li  
Miao-Xin Li  
Min Li  
Min-Dian Li  
Ming Li  
Mingguang Li  
Ming-He Li  
Minghua Li  
Mingshun Li  
Ming-Tao Li  
Mingxun Li  
Mingyu Li  
Mingzhou Li  
Mulin Li  
Muwang Li  
Na Li  
Nan Li  
Nanlin Li  
Ning Li  
Norman Li  
P. Andy Li  
Paul Li  
Pei-Tzu Li  
Peng Li  
Phillip Li  
Qi Li  
Qian Li

Qiang Li  
Qiao Li  
Qinfei Li  
Qingguo Li  
Qinglei Li  
Qingsheng Li  
Qiu Li  
Qiuhong Li  
Qiutang Li  
Qiwei Li  
Quan Li  
Quanmin Li  
Ran Li  
Rende Li  
Renfeng Li  
Rong Li  
Rongfeng Li  
Rui Li  
Ruijiang Li  
Ruiying Li  
Runsheng Li  
Ruosha Li  
Sai-Ping Li  
Sean (Xuguang) Li  
Shanshan Li  
Shao Li  
Shaokun Li  
Shaoying Li  
Shau-Hsuan Li  
Sheng Li  
Shengnan Li  
Shi-Fang Li  
Shihua Li  
Shi-Ming Li  
Shisheng Li  
Shouli Li  
Shu Li  
Shuo Li  
Shuxin Li  
Shuzhao Li  
Song Li  
Taisheng Li  
Tangliang Li  
Tao Li  
Tiangang Li  
Tianjing Li  
Tianqing Li  
Tiejun Li  
Ting Li  
Tingqiang Li  
Tongtong Li

Wei Li  
Weigang Li  
Weikai Li  
Wei-Wei Li  
Weizhong Li  
Wen Li  
Wenhui Li  
Wenjun Li  
Wentao Li  
Wenyuan Li  
Wenzhi Li  
Wu Li  
Xia Li  
Xiang Li  
Xiang-An Li  
XiangRui Li  
Xiangyang Li  
Xiao Li  
Xiaobai Li  
Xiao-Dan Li  
Xiaohong Li  
Xiaojiang Li  
Xiaojuan Li  
Xiaokun Li  
Xiaoming Li  
Xiaonan Li  
Xiao-Nan Li  
Xiaopeng Li  
Xiaoping Li  
Xiaoqiang Li  
Xiaorong Li  
Xiaowei Li  
Xiaoyan Li  
Xiao-Yu Li  
Xin Li  
Xinde Li  
Xine Li  
Xingfeng Li  
Xingnan Li  
Xingshan Li  
Xin-Jian Li  
Xinjing Li  
Xinxu Li  
Xinying Li  
Xinyuan Li  
Xinzheng Li  
Xiong Li  
XiuJun Li  
Xu Li  
Xuan Li  
Xue-Bao Li

Xuechao Li  
Xue-Dong Li  
Xuejun Li  
Xue-Jun Li  
Xuexian Li  
Xuping Li  
Xuqi Li  
Y.F. Li  
Yan Li  
Yan Chun Li  
Yang Li  
Yaning Li  
Yanqing Li  
Yanzhang Li  
Yao Li  
Yaoming Li  
Ye Li  
Ye Lennon Li  
Yi Li  
Yin Li  
Yinchuan Li  
Ying Li  
Ying Ying Li  
Yingkui Li  
Yingyue Li  
Yinxin Li  
Yi-Ping Li  
Yiwen Li  
Yong Li  
Yongfang Li  
Yonghua Li  
Yongjun Li  
Yongqing Li  
Yongxin Li  
Yuan Li  
Yuanfa Li  
Yuanyou Li  
Yuanyuan Li  
Yuchang Li  
Yue Li  
Yuelin Li  
Yue-Zhong Li  
Yuhuan Li  
Yuju Li  
Yulin Li  
Yuling Li  
Yumei Li  
Yun Li  
Yunjie Li  
Yunqi Li  
Yupeng Li

Yurong Li  
Yuxin Li  
Yuxing Li  
Yuzhan Li  
Yvonne Li  
Zechao Li  
Zhang Li  
Zhanguo Li  
Zhanjun Li  
Zhaohui Li  
Zhaojun Li  
Zhaoshen Li  
Zhao-Shen Li  
Zhe Li  
Zhen Li  
Zheng Li  
Zhengguo Li  
Zhengke Li  
Zhenqing Li  
Zhi Li  
Zhibin Li  
Zhicheng Li  
Zhigang Li  
Zhiguo Li  
Zhihao Li  
Zhihua Li  
Zhiming Li  
Zhi-Ming Li  
Zhineng Li  
Zhipeng Li  
Zhiqiang Li  
Zhiyong Li  
Zhongpei Li  
Zhongqi Li  
Zhong-Qian Li  
Zhongwu Li  
Zhongyi Li  
Zhoujun Li  
Zhuyun Li  
Zibo Li  
Zichao Li  
Zongjin Li  
Zongyun Li  
Bertrand Liagre  
Christine Lian  
Chunlan Lian  
Jane Lian  
Jie Lian  
Lu-Yun Lian  
Qizhou Lian  
C. Liang

Carol Liang  
Changhong Liang  
Chih-Ming Liang  
Decui Liang  
Deguang Liang  
Eryuan Liang  
Fenghe Liang  
Gangning Liang  
Guang Liang  
Guanxiang Liang  
Hai Liang  
Hao Liang  
Houjie Liang  
Hualou Liang  
Huey-Wen Liang  
Hung Hua Liang  
Jialiang Liang  
Jie Liang  
Jingjing Liang  
Juan Boo Liang  
Kelly Liang  
Lingyi Liang  
Matthew Liang  
Mingxiang Liang  
Nu-Chu Liang  
Pei Liang  
Qin Liang  
Qiu-Xia Liang  
Weili Liang  
Weiqian Liang  
Xi Liang  
Xiao Liang  
Xiaohui Liang  
Xibin Liang  
Xihui Liang  
Xinchen Liang  
Xing-Jie Liang  
Xiubin Liang  
Xuanwei Liang  
Xufang Liang  
Yajie Liang  
Yajun Liang  
Yantao Liang  
Yong Liang  
Yu Liang  
Yuan Liang  
Yuanbo Liang  
Yuzhen Liang  
Zhenchang Liang  
Zheng-Lun Liang  
Zheng-Wei Liang

Zhiqing Liang  
M.A. Liangli  
Georgios Lianos  
Alexandra Lianou  
Chen Liao  
Chun-Hou Liao  
D. Joshua Liao  
Eric Liao  
Felix Haifeng Liao  
Fuyuan Liao  
Gui-Qing Liao  
Guo-Shiou Liao  
Hong Liao  
Hung-Chang Liao  
Jie Liao  
Joseph Liao  
Jyh-Fei Liao  
Katherine Liao  
L.L. Liao  
Li Liao  
Lili Liao  
Ming Liao  
Pei-Chun Liao  
Ping Liao  
Riqiang Liao  
Rongzhen Liao  
Shih-Cheng Liao  
Shunyao Liao  
Sumei Liao  
T.Y. Liao  
Wei Liao  
Weijia Liao  
Wenbo Liao  
Xiaoyun Liao  
Xing Liao  
Yalin Liao  
Yaping Joyce Liao  
Yi Liao  
Yi-Chun Liao  
You-Di Liao  
Yu-Cai Liao  
Yu-Chien Liao  
Irfana Liaqat  
S.Y. Liaw  
Yung-Po Liaw  
Marc Libault  
Lisa Libby  
Stephen Libby  
Gary Libecap  
Camilo Libedinsky  
Giulia Liberati

Krzysztof Liberek  
Frederic Libersat  
Claude Libert  
William Liberti III  
Melissa Libertus  
Alexander Liberzon  
Alexandre Liborio  
Massimo Libra  
Silvia Libro  
Diana Libuda  
Hongmei Li-Byarlay  
Vincent Licata  
Orazio Licciardello  
Paul Licciardi  
Brigitte Licht  
Jonathan Licht  
Michael Lichten  
Michael Lichtenauer  
Erik Lichtenberg  
Kenneth Lichtenstein  
Wandy Lichtenthal  
Miriam Lichtner  
M.A. Lichtenauer  
Joshua Liddy  
Kerstin Lidén  
Lena Lidfors  
Stefan Liebau  
Andre Lieber  
Diana Lieber  
Justin Lieber  
Michael Lieber  
Richard Lieber  
Daniel Lieberman  
Debra Lieberman  
Harris Lieberman  
Jay Lieberman  
Paul M Lieberman  
Phillip Lieberman  
Wilfred Lieberthal  
Jürgen Liebig  
Andrea Liebl  
Daniel Liebl  
Hans Liebl  
Elisabeth Liebler-Tenorio  
Edward Liechty  
Pablo Liedo  
Carole Liedtke  
Michelle Liedtke  
Wolfgang Liedtke  
Justin Liefer  
Victor Lieffers

Jean-Francois Liegeois  
Angela Liegey Dougall  
Robert Liem  
Edith Liemburg  
Eric Lien  
Judit Lienert  
Sascha Liepelt  
Inga Liepelt-Scarfone  
Marc Liesa  
John Lieske  
Arthur Liesz  
Daniel Lietha  
Judith Lieu  
Deah Lieurance  
Oi Wah Liew  
Woei Chang Liew  
Yi Jin Liew  
Zeyan Liew  
Alan Lifson  
Libby Liggins  
Claudio Liguori  
Giovanna Liguori  
Jaan Liira  
Diego Lijavetzky  
Walter Lilenbaum  
Brandi Liles  
Mikael Lilja  
Markus Lill  
Roland Lill  
Troels Lillebaeck  
Catherine Lilley  
Martin Lilley  
Cathrine Lillo  
Concepcion Lillo  
Triantafillos Liloglou  
Albert Lim  
Boon L. Lim  
Bora Lim  
Chunghun Lim  
Gui Yin Grace Lim  
Han Lim  
Hui Fang Lim  
Hyuk Lim  
Ilhan Lim  
Jae-Yol Lim  
Jihyeon Lim  
Jongil Lim  
Jong-Seok Lim  
Joon Lim  
Julian Lim  
Kah-Leong Lim

Kian Lim  
Kian Meng Lim  
Kihong Lim  
Kuang Kuay Lim  
Lina Lim  
Lipyeow Lim  
Norman Lim  
Phaik-Eem Lim  
Rebecca Lim  
Renly Lim  
Robert Lim  
Sungkyun Lim  
Tit Meng Lim  
Un Taek Lim  
Unhee Lim  
Wai Lim  
Yen Ying Lim  
Yiheng Lim  
Yoongho Lim  
Young Woon Lim  
Young-Suk Lim  
Carla Lima  
Joni Lima  
Kledoaldo Lima  
Lidia Lima  
Marcelo de Oliveira Lima  
Marcos Lima  
Mauricio Lima  
Renata Lima  
Rui Lima  
Vilma Lima  
Walter de Paula Lima  
Paulo Lima Gomes  
Gipsi Lima-Mendez  
Thomas Liman  
Matheus Lima-Ribeiro  
Rupali Limaye  
Jacqueline K. Limberg  
Kirsten Limesand  
Wu Limin  
Thawornchai Limjindaporn  
B. N. Limketkai  
Direk Limmathurotsakul  
Charles Limoli  
Agenor Limon  
Jean Limongi  
Sophie Limou  
Maarten Limper  
Savitree Limtong  
Aifen Lin  
Chen Lin

Cheng-Li Lin  
Cheng-Wen Lin  
Chen-Yong Lin  
Chi Lin  
Chia-Hua Lin  
Chien-Chi Lin  
Chien-Liang Lin  
Chih-Che Lin  
Chih-Lin Lin  
Chih-Peng Lin  
Chi-Hung Lin  
Chin-Hsien Lin  
Chin-Kai Lin  
Chin-Tarng Lin  
Chin-Yo Lin  
Chuan Lin  
Chun Chieh Lin  
Chung-Ping Lin  
Chung-Yen Lin  
Chung-Ying Lin  
ChunLiang Lin  
Chun-Liang Lin  
Chun-Mao Lin  
Chun-Pin Lin  
Chunye Lin  
Chun-Yen Lin  
Chun-Yu Lin  
Deshu Lin  
Fan-Xue Lin  
Feng-Yen Lin  
Fuchun Lin  
Fuhua Lin  
Ge Lin  
Geng Lin  
Guo-Le Lin  
Han-You Lin  
Hao Lin  
Harrison W. Lin  
Honghuang Lin  
Honghui Lin  
Hsien-Chang Lin  
Hsi-Hsun Lin  
Hsin-Ching Lin  
Hsing-Juh Lin  
Hung-Du Lin  
Hung-Yun Lin  
Jack Lin  
Jen-Jia Lin  
Jiang-Jen Lin  
Jiaxing Lin  
Jieru Lin

Jinxiu Lin  
Jo-Fu Lin  
Jules Lin  
Jun Lin  
Kangyu Lin  
Kun-Jhih Lin  
Lawrence Lin  
Lei Lin  
Liang-Ching Lin  
Liang-Tzung Lin  
Li-Mei Lin  
Lin Lin  
Liu Lin  
Mao Lin  
Mei-Hui Lin  
Meng Lin  
Ming-Chih Lin  
Mingli Lin  
Mingqun Lin  
Ming-Tsan Lin  
Ming-Tsung Lin  
Ming-Wei Lin  
Ming-Yen Lin  
Nan Lin  
Nengming Lin  
Nina Lin  
Ning Lin  
Pan Lin  
Patrick Lin  
Peter Lin  
Ping-Ting Lin  
Qiang Lin  
Qinhua Lin  
Ruo-Kai Lin  
Shih-Hua Lin  
Shin Lin  
Shinn-Zong Lin  
Shu Lin  
Shu-Chun Lin  
Shuei-Liong Lin  
Shu-Fu Lin  
Shu-Min Lin  
Shyh-Hsiang Lin  
Si-Min Lin  
Sue-Hwa Lin  
Suewei Lin  
Susan Lin  
Sze-Kwan Lin  
Tao Lin  
Tiao-Yin Lin  
Tong-Jun Lin

Tsai-Lien Lin  
Tsai-Yu Lin  
Tsan-Piao Lin  
Tsung-Hsien Lin  
Tzu-Hao Lin  
Tzung-Jin Lin  
Valerie Lin  
Wan-Wan Lin  
Wan-Yu Lin  
Wei-Ning Lin  
Wei-Yang Lin  
Wen-Chang Lin  
Wen-Yuan Lin  
Xiaochen Lin  
Xiaojing Lin  
Xin Lin  
Xiongjie Lin  
Xubo Lin  
Y. C. Lin  
Yan Lin  
Ya-Wen Lin  
Yen-Chang Lin  
Yeong Shin Lin  
Yi Pu Lin  
Yi-Ching Lin  
Yi-Chung Lin  
Yi-Ling Lin  
Yi-Mei Lin  
Ying-Chi Lin  
Ying-Hung Lin  
Yingsong Lin  
Ying-Ting Lin  
Yi-Ting Lin  
Yi-Tsen Lin  
Yi-Tsung Lin  
Yongjun Lin  
You-Min Lin  
Yowyu Lin  
Yuan-Feng Lin  
Yucong Lin  
Yueweu Lin  
Yu-Hsuan Lin  
Yu-Kai Lin  
Yu-Shan Lin  
Zhao Lin  
Zhifen Lin  
Zhi-Qing Lin  
Zhiqun Lin  
Zhiyong Lin  
Zhongxu Lin  
Zibei Lin

Zu-Yau Lin  
Benedetto Linaldeddu  
Christine Linard  
Maria Linares  
Marco Linari  
Olle Lind  
Anders Lindahl  
Paul Lindahl  
Per Lindahl  
Tomas Lindahl  
R. Lindahl-Jacobsen  
Eva Lindberg  
Greger Lindberg  
Iris Lindberg  
Påvel Lindberg  
Søren Lindberg  
Kim Lindblade  
Annika Lindblom  
Joni Lindbohm  
Klaus Linde  
Karl-Fredrik Lindegaard  
Annukka Lindell  
Catherine Lindell  
Dennis Lindell  
Amanda Lindeman  
Marjaana Lindeman  
Neal Lindeman  
Ulrich Lindemann  
Petra Lindemann-Matthies  
Dan Linden  
Jérôme Linden  
Rafael Linden  
Thomas Lindenstrøm  
Thies Lindenthal  
Ulrike Lindequist  
Joshua Linder  
Maria Linder  
Nicolas Linder  
Stefan Linder  
Stig Linder  
Michael Linderman  
Jutta Lindert  
Steven Lindfield  
Björn Lindgren  
Helena Lindgren  
Jussi T. Lindgren  
S.R. Lindheim  
Anna Lindholm  
Bengt Lindholm  
Dan Lindholm  
Torun Lindholm

Amanda Lindholm-Perry  
Richard Lindley  
Steven Lindley  
Angelica Lindlöf  
Alberto Lindner  
Daniel Lindner  
Ewald Lindner  
Volkhard Lindner  
Zoe Lindo  
David Lindo-Atichati  
Steven Lindow  
Derick Lindquist  
Pelle Lindqvist  
Roland Lindqvist  
Richard Lindroth  
Everett Lindsay  
Peter Lindsey  
Marcus Lindskog  
Carita Lindstedt  
Anna Lindstrand  
Jon Lindstrom  
Nils Lindstrom  
Sandra Lindstrom  
Eva Lindström  
Kristina Lindström  
Tom Lindström  
Bernt Lindtjørn  
Charlotta Lindvall  
Antonio Linero  
Lisa Lines  
Italo Linfante  
Erjun Ling  
Fangqiong Ling  
Feng Ling  
Hui Ling  
Jiqiang Ling  
Kai-Shu Ling  
Pei-Ra Ling  
Shiqi Ling  
Sajan Lingala  
Jairam Lingappa  
Nura Lingawi  
Annett Linge  
Theagarten Lingham-Soliar  
Enqiang Linghu  
Angelika Lingnau  
Guido Lingua  
Robert Linhardt  
Daniel Linhares  
Alexander Link  
Dan Link

Emma Link  
Dirk Linke  
Wayne Linklater  
Rita Linko  
Paul Links  
Charles Linn  
Jennifer Linn  
Sabine C. Linn  
Vesa Linnamo  
Adrian Linnane  
Alexandra Linnemann  
Sebastian Linnemayr  
Andreas Linninger  
Teresa Lino-Neto  
T. Linsenmeyer  
Anja Linstädter  
Joerg Linstaedter  
Carole Linster  
Martin Linster  
MacRae Linton  
Paul Lintott  
Nicholas Lintzeris  
Alexandra Linz  
Dominik Linz  
John Linz  
Alexis Lion  
Thomas Lion  
Michail Lionakis  
Lilla Lionetti  
Vincenzo Lionetti  
Clifford Liongue  
Bill Lionheart  
Christos Lionis  
Geraldine Liot  
Gregory Liou  
Jyh-Ming Liou  
Saou-Hsing Liou  
Jeih-San Liow  
Lee Hsiang Liow  
Patrycja Lipinska  
Marta Lipinski  
Peter Lipke  
Steven Lipkin  
Heather Lipkind  
Stanley Lipkowitz  
Hans-Peter Lipp  
Ottmar Lipp  
Peter Lipp  
Richard Lippa  
Frank Lippert  
Gunther Lippert

Donatella Lippi  
Sonia Lippke  
Sheri Lippman  
Jocelyn Lippman-Bell  
Arto Lipponen  
Hans Joachim Lipps  
Esther Lips  
Katrin Lips  
Paul Lips  
Joshua Lipschutz  
John Lipscomb  
David Lipson  
Jack Lipton  
John LiPuma  
Samuel LiPuma  
Wendy Lipworth  
Fabio Lira  
John Lis  
Stefanie Lis  
Lynda Lisabeth  
Robert Lisak  
Thiago Lisboa  
Dennis Lischewski  
Silke Lischka  
Nadra Lisha  
Adam Liska  
Petra Liskova  
Pawel Liskowski  
John Lisle  
John Lisman  
Ton Lisman  
Sarka Lisonkova  
Katarzyna Lisowska  
Steven Liss  
Rurik List  
Gianluca Lista  
Aaron Liston  
Chrysa Lithari  
Karen Lithgow  
Trevor Lithgow  
Gianni Liti  
Gary Litman  
Jordan Litman  
Jerzy Litniewski  
Paloma Liton  
Alan Litsky  
Jonathan Litt  
Benjamin Littenberg  
Alexander Little  
Daniel Little  
David Little

Dianne Little  
Jonathan Little  
Joshua Little  
Mark Little  
Tanya Little  
Chris Littlewood  
Zachary Litvack  
Matthew Litvak  
Irene Litvan  
Taras Litvin  
Anastasia Litvintseva  
Sheldon Litwin  
Kristin Litzelman  
Aiping Liu  
Aizhong Liu  
Albert Liu  
Alice Liu  
An Liu  
Angela Liu  
Bang Liu  
Bao Liu  
Baodong Liu  
Baogang Liu  
Baohua Liu  
Baoming Liu  
Bei Liu  
Beidong Liu  
Bin Liu  
Bing Liu  
Binghe Liu  
Bingqian Liu  
Bingqiang Liu  
Bo Liu  
Bolan Liu  
Botao Liu  
Can Liu  
Canran Liu  
Cathy Liu  
Chang Liu  
Changchun Liu  
Chao Liu  
Chaojie Liu  
Che-Ming Liu  
Chen Liu  
Chenggang Liu  
Cheng-Tzu Liu  
Chien-An Liu  
Chi-Hsiu Liu  
Ching-Chuan Liu  
Ching-Ti Liu  
Chin-hsin Liu

Chuang Liu  
Chuanhe Liu  
Chun-Chi Liu  
Chun-Feng Liu  
Chun-Hung Liu  
Chunsheng Liu  
Cindy Liu  
Cuiqing Liu  
Cun-Zhi Liu  
Dandan Liu  
David Liu  
Deede Liu  
Degao Liu  
Deguang Liu  
Delei Liu  
Dengcai Liu  
De-Pei Liu  
Desheng Liu  
Dexiang Liu  
Di (Richard) Liu  
Dongcheng Liu  
Dongfang Liu  
Dongfei Liu  
Dongxu Liu  
Dongyou Liu  
Dun Liu  
Enke Liu  
F. Liu  
Fabao Liu  
Fang Liu  
Fangfang Liu  
Fei Liu  
Feng Liu  
Fu-Tong Liu  
Gang Liu  
Gangcai Liu  
George Liu  
Guanjun Liu  
Guansheng Liu  
Guanshu Liu  
GuoShi Liu  
Guoxiang Liu  
Hai Liu  
Haihu Liu  
Haijin Liu  
Haipeng Liu  
Haitao Liu  
Hai-Yan Liu  
Hao Liu  
Hao-Li Liu  
Haoyu Liu

Helene Minyi Liu  
Hong Liu  
Hongbin Liu  
Hongbo Liu  
Hongling Liu  
Hongmin Liu  
Hongting Liu  
Hongyan Liu  
Hsiao-Dung Liu  
Hsin-Fu Liu  
Hsuan Liu  
Hua Liu  
Huacheng Liu  
Huan Liu  
Hu-Chen Liu  
Hui Liu  
I-Chung Liu  
I-Hsin Liu  
I-Min Liu  
Ingrid Liu  
Jeffrey Liu  
Jer-Yuh Liu  
Jia Liu  
Jiabin Liu  
Jialing Liu  
Jian Liu  
Jiandong Liu  
Jiang-Qin Liu  
Jianguo Liu  
Jianhua Liu  
Jian-Min Liu  
Jian-Ping Liu  
Jianquan Liu  
Jianzhu Liu  
Jiashou Liu  
Jiayong Liu  
Ji-Bin Liu  
Jie Liu  
Jifeng Liu  
Jin Liu  
Jing Liu  
Jinghua Liu Liu  
Jingwu Liu  
Jingze Liu  
Jinhua Liu  
Jinping Liu  
Jiong Liu  
Juan Liu  
Jue Liu  
Ju-Fang Liu  
Jun Liu

Jun-Jen Liu  
Kai Liu  
Kaiyu Liu  
Ke Liu  
Kebin Liu  
Kede Liu  
Ken Liu  
Kenneth Liu  
Keyan Liu  
Leqian Liu  
Li Liu  
Liang Liu  
Liezhaio Liu  
Lili Liu  
Lin Liu  
Ling Liu  
Ling-Zhi Liu  
Liwang Liu  
Lu Liu  
Lukai Liu  
Manhua Liu  
Man-Qing Liu  
Meilian Liu  
Meilin Liu  
Min Liu  
Ming Liu  
Minghui Liu  
Mingxia Liu  
Nan Liu  
Ning Liu  
P. Liu  
Pan-Ping Liu  
Peggy Liu  
Peng Liu  
Pengyuan Liu  
Philip Liu  
Pi-Jen Liu  
Ping Liu  
Pingsheng Liu  
Po-Hong Liu  
Qi Liu  
Qiang Liu  
Qin Liu  
Qing Liu  
Qingchang Liu  
Qinghua Liu  
Qing-Lin Liu  
Qingsheng Liu  
Qing-Song Liu  
Qingyun Liu  
Qiong Liu

Qiu-Ning Liu  
Ren-Shyan Liu  
Renyu Liu  
Richard Liu  
Rui Liu  
Ruicui Liu  
Runran Liu  
Ryan Wen Liu  
Saifeng Liu  
Sanzhen Liu  
Sha Liu  
Shanlin Liu  
Shanrong Liu  
Shaojun Liu  
Shelan Liu  
Shichao Liu  
Shiguang Liu  
Shiguo Liu  
Shih-An Liu  
Shih-Jen Liu  
Shihui Liu  
Shikai Liu  
Shing Liu  
Shu Liu  
Shufeng Liu  
Shujun Liu  
Shuo Liu  
Shuqing Liu  
Shuyu Liu  
Shuzhen Liu  
Sichao Liu  
Song Liu  
Su-Hsun Liu  
Suyang Liu  
Tao Liu  
Taosheng Liu  
Teng Liu  
Tian Liu  
Tianming Liu  
Tie Fu Liu  
Tiffany Ting Liu  
Tsunglin Liu  
Wei Liu  
Weibo Liu  
Weiguo Liu  
Weiru Liu  
Wen Liu  
Wende Liu  
Wenhai Liu  
Wen-Hsien Lewis Liu  
Wenjie Liu

Wenjun Liu  
Wenshe Liu  
Wen-Tso Liu  
Wenya Liu  
Wenzhe Liu  
X. Sherry Liu  
Xiang Dong Liu  
Xiangrong Liu  
Xiangye Liu  
Xianyun Liu  
Xiao Liu  
Xiao Fan Liu  
Xiaobing Liu  
Xiaohui Liu  
Xiaojing Liu  
Xiaojuan Liu  
Xiaole Shirley Liu  
Xiaolu Liu  
Xiaoning Liu  
Xiaoping Liu  
Xiaorong Liu  
Xiaoting Liu  
Xiaoyun Liu  
Xigang Liu  
Ximeng Liu  
Xin Liu  
Xindong Liu  
Xinhai Liu  
Xinwang Liu  
Xinyi Liu  
Xi-Qiang Liu  
Xiufan Liu  
Xiuwen Liu  
Xu Liu  
Xuan Liu  
Xuanshi Liu  
Xuanyao Liu  
Xubing Liu  
Xuefeng Liu  
Xue-Li Liu  
Xueyan Liu  
Xuhui Liu  
Xulei Liu  
Xuming Liu  
Xun Liu  
Xuyang Liu  
Y. Liu  
Yahui Liu  
Yan Liu  
Yang Liu  
Yanhe Liu

Yanhong Liu  
Ya-Wen Liu  
Ye Liu  
Yecai Liu  
Yen-Lin Liu  
Yen-Nien Liu  
Yen-Wen Liu  
Yi Liu  
Yi-Chang Liu  
Yike Liu  
Yiliu Liu  
Yilun Liu  
Ying Liu  
Ying-Bin Liu  
Ying-Hsang Liu  
Yingyi Liu  
Yin-Quan Liu  
Yi-Wen Liu  
Yongbo Liu  
Yongchao Liu  
Yongfeng Liu  
Yonghong Liu  
Yongqin Liu  
Yongsheng Liu  
Yong-Yu Liu  
Yong-Zhong Liu  
Yu Liu  
Yuan Liu  
Yu-Chi Liu  
Yudong Liu  
Yun Liu  
Yuncaho Liu  
Yunhua Liu  
Yuru Liu  
Yusen Liu  
Yushi Liu  
Yutao Liu  
Yuwei Liu  
Z. Lewis Liu  
Zeming Liu  
Zewen Liu  
Zexian Liu  
Zhandong Liu  
Zhangkui Liu  
Zhao Liu  
Zhaoming Liu  
Zhen Liu  
Zhenghui Liu  
Zhenguo Liu  
Zhenzhen Liu  
Zhi Liu

Zhi-Hai Liu  
Zhihu Liu  
Zihua Liu  
Zhilei Liu  
Zhili Liu  
Zhipeng Liu  
Zhi-Ping Liu  
Zhixia Liu  
Zhiyong Liu  
Zhiyuan Liu  
Zhongbao Liu  
Zhonghua Liu  
Zhongsong Liu  
Zhongyuan Liu  
Zili Liu  
Ziqing Liu  
Zonghua Liu  
Zuojia Liu  
Marco Tullio Liuzza  
Britt Livak  
Giacomo Livan  
Todd Livdahl  
Helen Liversidge  
Gill Livingston  
Daniel Livorsi  
Adam Liwo  
Lisa Lix  
Namal Liyanage  
Lucylynn Lizarondo  
Diego Lizcano  
Anne Lize  
Lotta Ljung  
Karl Ljungberg  
Bastien Llamas  
Elena Llano  
Alejandro Llanos  
Paola Llanos  
Alberto Lleo  
Matilde Leonart  
Adrián Llerena  
Martin Llewelyn  
Josep M. Llibre  
Rafael Llinas  
Marc Lliros  
Joaquim Llisterri  
Nùria Lloberas  
Ana Llopart  
Xavier Llor  
Bertrand Llorente  
Briardo Llorente  
Josep Lloreta

Celia Lloret-Linares  
J. M. Lloris Carsí  
Matxalen Llosa  
Roland Lloubes  
Josep M Llovet  
Amanda Lloyd  
Andrew Lloyd  
Dafydd Lloyd  
Donna Lloyd  
James Lloyd  
Joyce Lloyd  
K.C. Kent Lloyd  
R. Stephen Lloyd  
Shane Lloyd  
Mari Lloyd-Williams  
Salvador Lluch-Cota  
Laura Llull  
Chu-Fang Lo  
Chung-Ming Lo  
Gin-Ho Lo  
Janet Lo  
Jeng-Fan Lo  
Kuang-Yao Lo  
Li-Wei Lo  
Wai U Lo  
Yi-Chun Lo  
Yuan-Hung Lo  
Yu-Shu Lo  
Giosuè Lo Bosco  
Claudio Lo Iacono  
Lorenzo Lo Muzio  
Alessandra Lo Presti  
Claudia Lo Sicco  
Jordan Loader  
Hugo A. Loaiciga  
Gwenolé Loas  
Z.I. Lobato  
Elizabeth Lobb  
Rebecca Lobb  
Peter Lobel  
Phillip Lobel  
Jenny Loberg  
Guillaume Lobet  
Peter Lobie  
Muriel Lobier  
Gerald Lobley  
Anders Løbner-Olesen  
Anderson Lobo  
Jorge Lobo  
Jose Lobo  
Peter Lobo

Roanna Lobo  
Ronstan Lobo  
Sonja Lobo  
Valentine Lobo  
Jorge Lobo Arteaga  
Steven Lobritto  
Donald Lobsien  
Stephen Locarnini  
Joseph Locascio  
Denise Locatelli  
Francesco Locatelli  
Amanda Lochner  
Adam Locke  
Jayme Locke  
Robert Locke  
Joseph Locker  
Nicolas Locker  
Shawn Lockery  
Sarah Lockie  
Oksana Lockridge  
Brent Lockwood  
Craig Lockwood  
Julie Lockwood  
Randall Loder  
Andrew Lodge  
Caroline Lodge  
Jean Lodge  
Nilanjan Lodh  
Aemen Lodhi  
Irfan Lodhi  
Sara Lodi  
Melissa Lodoen  
Gregory Lodygensky  
Susan Loeb  
Natascha Loebnitz  
Bettina Loeffler  
Craig Loehle  
Ruth Loellgen  
Hugues Loemba  
Jeremy Paul Loenneke  
Andreas Loepke  
Adrian Loerbroks  
Thomas Loescher  
Hannes Loeser  
Tobias Loetscher  
Markus Loeven  
Mark Loewen  
Peter Loewen  
Yonatan Loewenstein  
Alexander Loewer  
Joanne Loewy

Johannes Loffing  
Romaric Loffroy  
Eric Lofgren  
Jennifer Lofgren  
Christer Lofstedt  
Aisha Lofters  
Mark Loftin  
Elizabeth Loftus  
Tyler Loftus  
Maria Logacheva  
Cathy Logan  
Corina Logan  
Gordon Logan  
K.E. Logan  
Kenneth Logan  
Susan Logan  
Theodore Logan  
M. Loganathan  
Delphine Logeart  
David Logerstedt  
Carmen Logie  
Colin Logie  
Giancarlo Logroscino  
Catherine Logue  
Everett Logue  
Salvatore Loguercio  
Denis Logunov  
Ping Yeap Loh  
Y. Peng Loh  
Birgit Lohberger  
Katharina Lohmann  
Mare Löhmus  
Michael Lohoff  
A. Lohrasebi  
Andrew Lohrer  
Michael Loik  
Scott Loiler  
Torsten Loin  
Hubert Loisel  
Alayna Loiselle  
Bette Loiselle  
Ursula Loizides-Mangold  
Monica Loizzo  
James Lok  
Lynette Loke  
Mun Fai Loke  
Yoon Loke  
Mette Løkeland  
Yuliya Lokhnygina  
Stephen Lokitz  
Zerina Lokmic

Anna Lokshin  
Irakli Loladze  
Kavita Lole  
Bernhard Loll  
Donald Lollar  
Pier Luigi Lollini  
Niklas Loman  
Koba Lomashvili  
Dean Lomax  
Isabelle Lombaert  
Julian Lombard  
Marlize Lombard  
Francesca Lombardi  
Giovanni Lombardi  
Guido Lombardi  
Raul Lombardi  
Caterina Lombardo  
Marco Lombardo  
Michael Lombardo  
Roberto Lombardo  
Antoni Lombarte  
Marek Lommatzsch  
Slawo Lomnicki  
Amedeo Lonardo  
Andr as London  
Erwin London  
Josh London  
Stephanie London  
Gustavo Londo o  
Maria Londo o  
Sarah Londrigan  
Patrick Lonergan  
Hoan Long  
Jian-Er Long  
Jun Long  
Katie Long  
Lawrence Long  
Meixiao Long  
Mian Long  
Michael Long  
Mingsheng Long  
Robert Long  
Weiwen Long  
Wenxing Long  
William Long  
Xiaochun Long  
Yan Long  
Ying Long  
Yong Long  
Zaiyang Long  
Adhemar Longatto-Filho

Ben Longdon  
Daniele Longhi  
Sonia Longhi  
Eleonora Longhin  
Ana Leda Longhini  
John Longino  
Jeffrey Longmate  
Mathew Longnecker  
Antonio Longo  
Benedetto Longo  
Francesca Longo  
Matthew Longo  
Sarah Longo  
V. Longo  
Valter Longo  
Thiago Regis Longo Cesar da Paixão  
Claudio Longobardi  
Patrizia Longone  
Nicholas Longrich  
Nick Longrich  
Fred Longstaffe  
Francesco Longu  
Andrew Lonie  
Elena Lonjedo  
Oona Lönnstedt  
Claire Lonsdale  
Darcy Lonsdale  
Maria Lonzano  
Jennifer Loo  
Jun-Hun Loo  
Keatwei Loo  
Lit-Hsin Loo  
Rolf Lood  
Torey Looft  
Chung Yeng Looi  
J.L. Looi  
Lai-Meng Looi  
Brett R. Loomis  
Mark Looney  
Matthew Loop  
Bruno Loos  
Maarten Loos  
Matthew Loose  
Anne Loosen  
Andreas Lopata  
Kristina Lopatiene  
Anatoli Lopatin  
Y.M. Lopatin  
Tatiana Lopatina  
Joyce Loper  
Ana Lopes

Anne Lopes  
Carina Lopes  
Coeli Lopes  
Isabel Lopes  
Joao Marcelo J. Lopes  
John Lopes  
José Lopes  
Lucia Lopes  
Luisa Lopes  
Norberto Lopes  
Silvio Lopes  
Ulisses Lopes  
José Lopes de Faria  
Iscia Lopes-Cendes  
Christophe Lopez  
Luis Lopez  
Mandi Lopez  
Marta Lopez  
Rosaria Lopez  
Daniel López  
Félix Antonio López  
Juan López  
Maria Celeste Lopez Abbate  
José López Bucio  
Evangelina López de Maturana  
Adolfo Lopez de Munain  
Juan Lopez Gappa  
Carlos Lopez Garcia  
Laura López Hoffman  
Elena Lopez Isac  
Marcelo Lopez Lastra  
Milagros Lopez Mendilaharsu  
Rafael Lopez Olarte  
Arturo Lopez Pineda  
Maria Cristina López Roberts  
Montserrat López Sanmartín  
Marilucy Lopez Sublet  
Diana Lopez-Alvarez  
Natalia López-Andrés  
Sandra Lopez-Arana  
Attener López-Arencibia  
Francisco Javier López-Baena  
Adria Lopez-Baucells  
Abel López-Bermejo  
Clemente Lopez-Bote  
César López-Camarillo  
Jose Luis López-Campos  
Elena Lopez-Cancio  
S. Lopez-Cortez Mdel  
Juan Carlos Lopez-Delgado  
Antonio Lopez-Fuenzalida

Esther Lopez-Garcia  
Mariana Lopez-Gongora  
Luz Lopez-Hernandez  
Patricio Lopez-Jaramillo  
Pia López-Jornet  
Liliana López-Kleine  
Luis Lopez-Llorca  
Lucia Lopez-Lopez  
Jose Lopez-Miranda  
Nacho Lopez-Moreno  
Francisco López-Muñoz  
Rodrigo López-Muñoz  
Jose López-Olmeda  
Jorge Ramón López-Olvera  
Andrés López-Pérez  
Enrique A. Lopez-Poveda  
Juan Lopez-Raez  
Valeriano López-Segura  
Reynold Lopez-Soler  
Margarita Lopez-Uribe  
Carlos López-Vaamonde  
Beatriz López-Valcárcel  
Leonardo Lopiano  
Benjamin Lopman  
Paul Loprinzi  
Irene Lorand-Metze  
Betty Lorch  
Gwendolen Lorch  
Janice Lord  
Kevin Lord  
Gaspar Lorén  
Natalie Lorent  
Mar Lorente  
Belén Lorente-Galdos  
Axel Lorentz  
Annika Lorenz  
Claudia Lorenz  
Jan Lorenz  
Klaus Lorenz  
Kristina Lorenz  
Sonja Lorenz  
Teresa Lorenz  
Christian Lorenzen  
Johan Lorenzen  
Niels Lorenzen  
Martina Lorenzetti  
Silvio Lorenzetti  
Antonello Lorenzini  
Bramanti Lorenzo  
Óscar Lorenzo  
Jacob Lorenzo-Morales

Ramon Lorenzo-Redondo  
Cristian Loretelli  
Vittorio Loreto  
Matthias-Claudio Loretto  
Brigitta Loretz  
Jody Lori  
Francesco Loria  
Stephanie Loria  
Sylvain Loric  
Rik Lories  
Balazs Lorincz  
Remy Loris  
Stefan Lorkowski  
Gauthier Loron  
Christian Lorson  
Alessio Lorusso  
Marek Los  
Sander Los  
Giovanni Losano  
Jose Losa-Reyna  
Thomas Löscher  
Julia Loseff-Silver  
Mario Losen  
Paul Losty  
Katarzyna Lota  
Damien Loterie  
Nathan Lothrop  
Jörn Lötsch  
Hannelore Lotter  
Christopher Lotz  
Jeffrey Lotz  
Emil Lou  
Hua Lou  
Pei-Jen Lou  
Qingqing Lou  
Qunfeng Lou  
Vivian Lou  
Xuelin Lou  
Ya-Huan Lou  
Yanjing Lou  
Yilai Lou  
Yuan Lou  
Zhiyong Lou  
Celine Louapre  
Philippe Louâpre  
James Loudon  
Remi Louf  
John Loughlin  
Psyche Loui  
Thomas Louie  
Elan Louis

Joe Louis  
John Louis  
Julien Louis  
Petra Louis  
Valérie Louis  
Valère Lounnas  
Alexandre Loupy  
Barbara Lourenco  
P. Lourenço  
Sebastian Lourido  
Ricardo Louro  
Diana Lousa  
Maria Lousada-Ferreira  
Denis Loustau  
Helder Louvandini  
Guillaume Louvel  
Goedele Louwagie  
Leoni Louwe  
Yoram Louzoun  
Sandro Lovari  
Francesca Lovat  
Arianna Lovati  
Martin Lövdén  
David Love  
Robert Love  
Ryan Love  
Marian Loveday  
Jasmine Loveland  
Charles Lovell  
David Lovell  
John Lovell  
Jonathan Lovell  
Andrew Lovering  
Marlina Lovett  
Irby Lovette  
Johan Lövgren  
Jeffrey Lovich  
Thelma Lovick  
Frank Lovicu  
Pierre Lovinfosse  
William Lovis  
Goran Lovric  
Eric LoVullo  
Andrew Lovy  
Daren Low  
Lian Leng Low  
Elaine Low-Decarie  
Alan Lowe  
Anne-Marie Lowe  
David Lowe  
Graeme Lowe

Martin Lowe  
Rachel Lowe  
Samantha Lowe  
William Lowe  
Clifford Lowell  
Hubert Löwenheim  
Susan Lowerre-Barbieri  
Jonathan Lowery  
Warren Lowman  
E. Anne Lown  
Mark Lown  
Janet Loxterman  
Andre Loxton  
Anna Loy  
Francisco Lozano  
Oscar Lozano  
A-Lien Lu  
Cheng Lu  
Chia-Chen Lu  
Chih-Hao Lu  
Chunming Lu  
Congming Lu  
Daru Lu  
De-Jian Lu  
Dengsheng Lu  
Fan Lu  
Fu-I Lu  
Fung-Jou Lu  
Guangquan Lu  
Gui Lu  
Gui-Hua Lu  
Han Lu  
Henry Horng-Shing Lu  
Hong Lu  
Hongbin Lu  
Hongzhou Lu  
Hua Lu  
Hui Jing Lu  
Huimin Lu  
Jenny Lu  
Jiachun Lu  
Jianhong Lu  
Jin-Jian Lu  
Jinsong Lu  
Jun Lu  
Jyh-Feng Lu  
Kai Lu  
Kim Lu  
Kun Lu  
Kuo-Cheng Lu  
Lanyuan Lu

Lihua Lu  
Lin Lu  
Ling Lu  
Lingeng Lu  
Linlin Lu  
Lin-Yu Lu  
Liqun Lu  
Long Lu  
Lu Lu  
Mei-Yeh Lu  
Meng Lu  
Ming-Kuei Lu  
Ming-Wei Lu  
Mingyang Lu  
Mujun Lu  
Peiou Lu  
Peng Lu  
Qi Long Lu  
Qiang Lu  
Qianjin Lu  
Qing-Chang Lu  
Qun Lu  
Riyu Lu  
Rongwen Lu  
Ru-Band Lu  
Sangwei Lu  
Shiang-Ru Lu  
Shiyong Lu  
Shun Lu  
Ting Lu  
Tong Lu  
Tzong-Shi Lu  
Tzu-Pin Lu  
Wei Lu  
Weiping Lu  
Weiqun Lu  
Wuxun Lu  
Wuyuan Lu  
Xiang Lu  
Xiang-Jun Lu  
Xiaoping Lu  
Xiaoyin Lu  
Xin Lu  
Yanhui Lu  
Yanrong Lu  
Yi Lu  
Yongbo Lu  
Yuan Lu  
Zhe Lu  
Zheming Lu  
Zheng-Rong Lu

Zhenyu Lu  
Zhijun Lu  
Zhiqiang Lu  
Zhiyong Lu  
Zhongjing Lu  
Zhongxian Lu  
Zhongyuan Lu  
Zunli Lu  
Zuxun Lu  
Jianhua Lü  
Ling Lǔ  
Chun Juan Luan  
Junbo Luan  
Xianghong Luan  
Yun-Xia Luan  
Arkadiusz Lubas  
Erik Lubberts  
Ronald Lubelchek  
Mark Lubell  
David Lubensky  
Pesach Lubinsky  
David Lubman  
Jim Luby  
Marie Luby  
Stephen Luby  
Corneliu Luca  
Sorin Luca  
Mark Lucanic  
Paulo Lucareli  
Giuseppe Lucarelli  
Alexander Lucas  
Bruno Lucas  
Gale Lucas  
Michaela Lucas  
Philippe Lucas  
Richard Lucas  
Robyn Lucas  
Sophie Lucas  
Spencer Lucas  
Stuart Lucas  
Thabata Lucas  
Dani Lucas-Barbosa  
Andrea Lucas-Hahn  
Magnus Lucassen  
Ugo Lucca  
Philippe Luccarini  
Maurizio Lucchesi  
Naomi Lucchi  
Sacha Lucchini  
Anthony Lucci  
Juan Lucena

Rainaldo Lucena  
Antônio Roberto Lucena-Araújo  
Modesto Luceño  
Ersila Lucenteforte  
Don Eliseo Lucero-Prisno III  
Jean-Christophe Lucet  
Adriano Lucheta  
Fred Luchette  
Andrea Luchetti  
Claudio Luchini  
Vivian Luchsinger  
Ferreiro Lucía  
Michelle Luciano  
Randy Luciano  
Olivier Lucidarme  
Julie Lucifora  
Diana Lucio-Arias  
Gary Luck  
Katja Luck  
Tobias Luck  
Christian Lück  
Brian Lockett  
Tim Lockett  
Brandon Lucke-Wold  
Tracy Luckhardt  
John Lucocq  
Michaela Luconi  
Tyrone Lucon-Xiccato  
Colwell Lucy  
Lukasz Luczaj  
Artur Luczak  
Juan Ludert  
Herbert Ludewick  
Ingo Ludolph  
Richard Luduena  
Elliot Ludvig  
Björn Ludwar  
Andreas Ludwig  
Arne Ludwig  
Marie-Gabrielle Ludwig  
Stephan Ludwig  
Jutta Ludwig-Mueller  
Ko-Huang Lue  
Lih-Fen Lue  
Neal Lue  
Aaron Luebbe  
Stefan Luebbers  
Laura Luebke  
Hendrik Luesch  
Jose Ruben Luevano Enriquez  
Suchaya Luewan

Jennifer Luff  
J. Christopher Luft  
Francesca Lugani  
Aurelia Lugea  
Abbas Lugemwa  
Fulgentius Lugemwa  
Maria Luger  
Alessandra Lugo  
Joaquin Lugo  
Halyna Lugova  
Ben Lugtenberg  
Dih-Ling Luh  
Renke Luhken  
Niklas Luhmann  
Arthur Luhur  
Roger Lui  
Cembalo Luigi  
Maartje Luijten  
Actis Luis  
Olinda Luiz  
Osmar Luiz  
Dip-Kei Luk  
Mária Lukáčová-Medvidová  
Nicholas Lukacs  
Dieter Lukas  
Thomas Lukas  
Piotr Lukasik  
Katarzyna Lukasiuk  
Henry Lukaski  
Katerina Lukasova  
Anne-Claire Lukaszewicz  
Adam Lukaszewski  
Amy Luke  
Elizabeth Hanna Luke  
Sheila Lukehart  
John Lukens  
Jodi Lukkes  
Suryani Lukman  
Angela Lukowski  
Robert Lukowski  
Andrew Luks  
Gediminas Luksys  
Konstantin Lukyanov  
Dorothee Lulé  
Matteo Lulli  
Bertram Lum  
Sooky Lum  
Jean-Pierre Lumaret  
Julie Lumeng  
Katalin Lumniczky  
Mary Ann Lumsden

Desmond Lun  
Wenhui Lun  
Antonio Luna  
Beth Luna  
M. Lunar  
Adriana Lunardi  
Amie Lund  
Jay Lund  
Troy Lund  
Hannah Lundberg  
Kristjen Lundberg  
Yunxia Lundberg  
Jesper Lundbom  
Thomas Lundebeberg  
Nils Lundeheim  
Marjorie Lundgren  
Andreas Lundh  
Daniel Lundin  
Knut Lundin  
Lars Lunding  
Emma Lundman  
Carolyn Lundquist  
Erik Lundquist  
Andreas Lundqvist  
Johan Lundqvist  
Maria Lung  
Mariia Lunova  
Yona Lunsky  
David Lunt  
Dominique Lunter  
Chaoxi Luo  
Chen Luo  
Cheng Luo  
Chunling Luo  
Dahai Luo  
Daya Luo  
Fangli Luo  
Gang Luo  
Geping Luo  
Hai Luo  
Hao Luo  
Jiangtao Luo  
Jianhua Luo  
Jiankai Luo  
Jian-Ping Luo  
Ji-Dung Luo  
Jiing-Chyuan Luo  
Jing Luo  
Jingqin Luo  
Kaijun Luo  
Ling-Feng Luo

Ming Luo  
Mingyue Luo  
Minnan Luo  
Na Luo  
P. Luo  
Qian Luo  
Robert Luo  
Sheng Luo  
Sheng-Dean Luo  
Shouhua Luo  
Shu-Jin Luo  
Wanjuan Luo  
Wenhong Luo  
Wenting Luo  
Xiaojin Luo  
Xiaolan Luo  
Xiaoping Luo  
Xin Luo  
Xiongbiao Luo  
Xiong-Jian Luo  
Yangmei Luo  
Yawei Luo  
Yi Luo  
Yi-Bo Luo  
Yong Luo  
Yongfeng Luo  
Yu Luo  
Yuan Luo  
Yufeng Luo  
Yukun Luo  
Yunjian Luo  
Zhe Luo  
Zhehui Luo  
Zhenyao Luo  
Zhijun Luo  
Zhongkui Luo  
Zisheng Luo  
Kaisa Luostari  
Angela Lupattelli  
Antonella Lupetti  
Christopher Lupfer  
Richard Lupia  
Blanca Lupiani  
Philip Lupo  
Shawn Lupold  
Peter Lupp  
Ivan Luptak  
Mihai Lupu  
Antoni Luque  
Ignacio Luque  
María D. Luque de Castro

Antonio Luque-Casado  
Daniela Luquetti  
Rosario Luquin  
Nell Lurain  
Diana Lurie  
Mark Lurie  
Jason Luscier  
Francis Luscinskas  
Natalie Luscombe-Marsh  
Donal Luse  
Lucy Lush  
John Lusingu  
Nicholas Lusk  
Katherine Lust  
Maryam Lustberg  
Wioleta Luszczek  
Molly Lutcavage  
Glen Lutchman  
Alexandra Lutnick  
Dominique Luton  
Irja Lutsar  
Pamela Lutsey  
Andreas Lutterotti  
Monika Lutters  
Jeffrey Luttrull  
Jens Lutz  
Joseph Lutz  
Kai Lutz  
Manfred Lutz  
Thomas Lutz  
Hung Luu  
Jeffrey Luvall  
Koen Luwel  
R. Luwor  
Thomas Lux  
G.W. Gant Luxton  
Valerie Luyckx  
Paula Luz  
Bin Lv  
Chen Lv  
Fan Lv  
Jiale Lv  
Linyuan Lv  
Tianyang Lv  
Wenhua Lv  
X. Lv  
Zhengmei Lv  
Cheng Ly  
Meghan Lybecker  
Stephen Lycett  
Ruth Lyck

David Lydall  
Patrick Lyden  
Sinéad Lydon  
Munn-Sann Lye  
Deirdre Lyell  
David Lyerly  
Amy Lykins  
Kenneth Lyles  
Lee Lyman  
Anastasios Lymperopoulos  
Christopher Lynch  
Conor Lynch  
David Lynch  
Elizabeth Lynch  
James T. Lynch  
Jerome Lynch  
Matthew Lynch  
Michael Lynch  
Shannon Lynch  
Stacey Lynch  
Michael Lynes  
Heidi Lyng  
Elsebeth Lynge  
Fiona Lynn  
Alexander Lyon  
Richard Lyon  
Elizabeth Lyons  
Ian Lyons  
Jeri-Anne Lyons  
John Lyons  
Leslie Lyons  
Robert Lyons  
Traci Lyons  
Karen Lyons-Ruth  
Divaldo Lyra Junior  
Philippe Lyrer  
Tamra Lysaght  
Martin Lysak  
Inna Lysnyansky  
Lisa Lyssenko  
Jonathan Lytton  
Dmytro Lytvyn  
Yuliya Lytvyn  
Lyubomyr Lytvynchuk  
Sang Woo Lyu  
Xiaoxuan Lyu  
Julia Lyubovitsky  
Phil Lyver  
Saraswathi M. S.  
Baojun Ma  
Buyong Ma

C.Y. Ma  
Changle Ma  
Chaoran Ma  
Cheng-Cang Ma  
Chi Ma  
Chun-Sen Ma  
Cuiping Ma  
Cuiqing Ma  
Cynthia Ma  
Dan-Dan Ma  
David Ma  
Ding Ma  
Dong Ma  
Dongyun Ma  
Duan Ma  
Eric Yue Ma  
Estella Ma  
Guangyong Ma  
Guojia Ma  
Hao Ma  
Hengyun Ma  
Hongshen Ma  
Hongxia Ma  
Hong-Xia Ma  
Hongxiang Ma  
Hsiao-Li Ma  
Jian Ma  
Jianhua Ma  
Jian-Xin Ma  
Jiaqi Ma  
Jin Yeul Ma  
Jincai Ma  
Jinxuan Ma  
Jun Ma  
Jun-Yu Ma  
K. Ma  
Kede Ma  
L. Ma  
Lei Ma  
Liang Ma  
Lina Ma  
Linlin Ma  
Miaojun Ma  
Ming-Chieh Ma  
Patrick Ma  
Peisong Ma  
Qianli Ma  
Qin Ma  
Qing Ma  
Renming Ma  
Rong Ma

Ruijie Ma  
Shao-Gang Ma  
Shuangtao Ma  
Stephanie Ma  
Suk Ma  
Ting Ma  
Wanbiao Ma  
Wan-Li Ma  
Wei Ma  
Weigang Ma  
Weihua Ma  
Weimin Ma  
Weiqiang Ma  
Wen Ma  
Wen-Lung Ma  
Wenxiu Ma  
XiaoChun Ma  
Xiaogang (Marshall) Ma  
Xiaoguang Ma  
Xiaojing Ma  
Xiaoning Ma  
Xiaoyin Ma  
Xie-Min Ma  
Xin-Long Ma  
Xuejun Ma  
Yalong Ma  
Yan Ma  
Ying Jie Ma  
Yitong Ma  
Yongqing Ma  
Yongxin Ma  
Yufang Ma  
Zhiyong Ma  
Zhonghua Ma  
Yuh-Fun Maa  
Thomas Maal  
Marie Maar  
Amy Maas  
Angela Maas  
Bea Maas  
Coen Maas  
Renke Maas  
Rutger Maas  
Benjamin Maasoumy  
Alexander Maass  
Jorma Maatta  
Taylor Maavara  
Ulaganathan Mabalirajan  
David Mabey  
Guillaume Mabileau  
Yo Mabuchi

Micheál Mac Aogáin  
Tim Mac Gloughlin  
David Mac Lean  
María Mac Swiney  
David MacAlpine  
Fabio Salvatore Macaluso  
Filippo Macaluso  
Michelle Macaraig  
Calum MacAulay  
Lance Macaulay  
Matthew Macauley  
Erasmo Macaya  
Paul Maccabee  
Marco Maccaferri  
Donna MacCallum  
Laura Maccari  
Alberto Macchi  
Mariana Maccioni  
Joy MacDermid  
Angus MacDonald  
Anita MacDonald  
Anna MacDonald  
Becky Macdonald  
Clinton MacDonald  
Douglas MacDonald  
Ellen Macdonald  
Ian MacDonald  
Kelly MacDonald  
Nicholas MacDonald  
Noni MacDonald  
Robert Macdonald  
Ross MacDonald  
Shannon MacDonald  
Stuart Macdonald  
Suzanne MacDonald  
Jacqueline MacDonald Gibson  
Conan MacDougall  
Scott MacDougall-Shackleton  
Emma Mace  
Mark MacEachern  
Alberto Maceda Veiga  
António Macedo  
Vaughan Macefield  
Bruce MacFadden  
Janet Macfall  
Shane MacFarlan  
David MacFarlane  
Peter MacFarlane  
Alastair MacGibbon  
Harold MacGillavry  
François Mach

Nuria Mach  
Khaled Machaca  
Ana Margarida Machado  
Carlos Machado  
Ednildo Machado  
Fabiana Machado  
Fernanda Machado  
Heather Machado  
José Machado  
Jose Carlos Machado  
Maria de Fatima Machado  
Mariana Machado  
Moara Machado  
Ricardo Machado  
Roberto Machado  
Rosangela Machado  
T.D. Machado  
Miroslav Machala  
Zdenko Machala  
Boguslaw Machalinski  
Jürgen Machann  
William Macharia  
Olivier Macherey  
Keigo Machida  
Kiego Machida  
Masayuki Machida  
Ryuji Machida  
Takuji Machida  
David Machin  
Rikuo Machinami  
Maria Teresa Machini  
Miloš Macholán  
Guillermo Machuca-Portillo  
David MacHugh  
Fernando Macian  
Diego Macias  
Juan Macías  
Constantino Macias Garcia  
Jose G. Maciá-Vicente  
Raphael Macieira  
Kristine Maciejewski  
Gabriel Maciel  
Manoela Maciel  
Rafael Maciel-de-Freitas  
Janet MacInnes  
Robert MacInnis  
Bradley MacIntosh  
Gustavo MacIntosh  
Salvador Macip  
Hugh MacIsaac  
Rachael MacIsaac

J. Scott MacIvor  
Benjamin Mack  
Katya Mack  
Sally MacKain  
Alex Mackay  
Brendan MacKay  
Duncan Mackay  
Dylan MacKay  
Ian Mackay  
Joel Mackay  
Judith Mackay  
Laura Mackay  
Rose-Marie Mackay  
Joreintje Mackenbach  
Alasdair MacKenzie  
Bryan Mackenzie  
Gerardo Mackenzie  
Grant Mackenzie  
Kelly Mackenzie  
Roger MacKenzie  
Tippi MacKenzie  
Todd MacKenzie  
Sarah Jane Mackenzie Ross  
Gina Mackert  
Stephen Mackessy  
Abigail Mackey  
David Mackey  
Dawn Mackey  
Roderick Mackie  
Sarah Mackie  
Robert Mackiewicz  
William Mackin  
Alexander Mackinnon  
Colum MacKinnon  
Ruth MacKinnon  
Claire Mackintosh  
Shylie Mackintosh  
Nigel Mackman  
Stephen Macknik  
Cheryl Mackowiak  
Robert MacLaren  
Andrew MacLean  
Kenneth Maclean  
Paul Maclean  
Michael MacLellan  
Calman MacLennan  
Megan MacLennan  
Catriona Macleod  
Hannah MacLeod  
James MacLeod  
Kirsty MacLeod

Malcolm Macleod  
Megan MacLeod  
Norman MacLeod  
Katie MacLure  
Lee Ann Macmillan-Crow  
Katherine MacNamara  
Camille Macnaughton  
Wallace MacNaughton  
Jill Macoska  
Sonya MacParland  
Alison Macpherson  
Ewan MacPherson  
Helen Macpherson  
Jenny MacPherson  
Peter MacPherson  
Rebecca MacPherson  
Kerry MacQuarrie  
Amy MacQueen  
Calum MacRae  
Kristie Macrakis  
Simone Macri  
Thomas Macrini  
John MacSharry  
Jason MacTaggart  
Jean-Marc Mac-Thiong  
Libor Macurek  
Thomas MacVittie  
Brian MacWhinney  
Aaron Macy  
Parvaz Madadi  
Vince Madai  
Zeynep Madak-Erdogan  
Satish Madala  
Kazimierz Madalinski  
Datta Madamwar  
Jason Madan  
Karan Madan  
Rajat Madan  
Taruna Madan  
Vanesa Madan  
Tariq Madani  
Parani Madasamy  
Rupalatha Maddala  
Anne Madden  
Chris Madden  
Kenneth Madden  
Ros Madden  
Guy Maddern  
Ted Maddess  
Krishna Rao Maddipati  
Leena Maddukuri

Mohan Maddur  
Scott Maddux  
Burkhard Madea  
Jean-Yves Madec  
Giordano Madeddu  
Paolo Madeddu  
Luciana Madeira da Silva  
Agnieszka Madej-Pilarczyk  
Pascal Madeleine  
Simone Mader  
Stephan Madersbacher  
Panagiotis Madesis  
Greg Madey  
Shabir Madhi  
Neha Madhiwala  
Mohammad Madhoun  
G.M. Madhu  
Rama Sashank Madhurapantula  
Mallur Madhusudhan  
Guillermo Madico  
S.R. Murthy Madiraju  
Nyovani Madise  
Daniel Madison  
Zahra Madjid  
Rosalinda Madonna  
M. Mador  
E. Madoroba  
Anne-Mette Madsen  
Ole Madsen  
Steffen Madsen  
Anazoeze Madu  
Alex Madva  
Andres Mae  
Akito Maeda  
Isseki Maeda  
Ken Maeda  
Naoyuki Maeda  
Shin Maeda  
Tatsuya Maeda  
Yasuhiro Maeda  
Yoshinobu Maeda  
Yukihide Maeda  
Yumi Maeda  
Micha T. Maeder  
Marc Maegele  
Goro Maehara  
Kenji Maehashi  
Yasuhiro Maejima  
Shinya Maekawa  
Takuya Maekawa  
Daniel D. Maeng

Steven Maere  
Art Maerlender  
Charline Maertens de Noordhout  
Jeroen Maertzdorf  
Dominiek Maes  
Gregory Maes  
Louis Maes  
Akito Maeshima  
Elena Maestri  
Michelangelo Maestri  
Elena Maestrini  
Anna Maestroni  
Jarek Maestu  
Silvia Maffei  
Vincenzo Maffei  
Claudio Maffeis  
Michele Maffia  
Andrea Mafficini  
Tania Maffucci  
Susana Magadan-Mompo  
Ana Magalhaes  
Elma Izze da Silva Magalhães  
Fernando Magalhães  
Constantinos Maganaris  
Everett Magann  
Jules Magda  
Anthony Magee  
Christopher A. Magee  
Jesse Mager  
Aude Magerus-Chatinet  
Marcio Mageski  
Mario Maggi  
Matias Maggi  
Ivan Maggini  
John E. Maggio  
Marcello Maggiolini  
Lillian Maggio-Price  
Zhila Maghbooli  
Brian Magi  
Kesson Magid  
Jessica Magidson  
Clint Magill  
Peter Magill  
Shelley S. Magill  
Parker Magin  
Thomas Magin  
Tara Maginnis  
Lucia Magis-Weinberg  
Adriano Magli  
Alessandro Magli  
Dangelo Magliano

Nicholas Magliocca  
Fabio Magliulo  
Antoine Magnan  
Christophe Magnan  
Heather Magnan  
Jared Magnani  
Mauro Magnani  
Amandine Magnaudeix  
Nicola Magnavita  
Ronald Magness  
Fulvio Magni  
Paolo Magni  
Stefano Magni  
Brooke Magnus  
Maria Magnus  
David Magnuson  
Mark Magnuson  
C.G. Magnussen  
Ulf Magnusson  
Katharine Magor  
Neil Magoski  
Priscilla Magrath  
Jocelyne Magré  
Donatella Magri  
Rafael Magris  
C Maguire  
David Maguire  
Jamie Maguire  
Kerry Maguire  
Beth Mah  
Vaikom Mahadevan  
W. F. Mahaffee  
Joseph Mahaffy  
Omid Mahain  
Ankit Mahajan  
Sahil Mahajan  
Supriya Mahajan  
Vikram Mahajan  
Yatin Mahajan  
Smita Mahale  
Aba Mahamat  
James R. Mahan  
John Mahan  
Nitish Mahapatra  
Sadhan Mahapatra  
Saugata Mahapatra  
Sidharth Mahapatra  
Tanmay Mahapatra  
Atsushi Mahara  
Surakameth Mahasirimongkol  
Krishna Kishore Mahato

Martyn Mahaut-Smith  
Sara Mahdavi  
Hamideh Mahdaviazad  
Hamid Mahdiuni  
Frédéric Mahé  
Frédéric Mahé  
Jaideep Mahendra  
Eshwar Mahenthiralingam  
Caitriona Maher  
Geoffrey Maher  
Sean Maher  
L. Maher III  
Zaynah Maherally  
Rajat Maheshwari  
Samuel Maheswaran  
Shyamala Maheswaran  
Mathieu Maheu-Giroux  
Lenin Mahimainathan  
Sofiane Mahjoub  
Hally Mahler  
Simon Mahler  
Robert Mahley  
Jörg Mahlich  
Hani Mahmassani  
Iftekhar Mahmood  
Javed Mahmood  
Sadiqa Mahmood  
Zafar Mahmood  
Ahmed Mahmoud  
Haytham Mahmoud  
Thair Mahmoud  
Shahrom Mahmud  
Mehmet Mahmut  
Karim Mahnam  
Alexander Mahnert  
Severine Mahon  
Megan Mahoney  
Jennifer Mahony  
Mohammad Mahoor  
Alexander Mahura  
Chun-Wai Mai  
Knut Mai  
Xiaoqin Mai  
Ana Luiza Maia  
Caroline Maia  
Yara Maia  
Cláudio Jorge Maia Baptista  
Mari Maia da Silva  
Juan Pablo Maianti  
Helder Maiato  
Edward Maibach

Inbal Maidan  
Daniel Maidana  
Ekaterina Maidji  
Ian Maidment  
Mark Maienschein-Cline  
Bernhard Maier  
Christoph Maier  
Jeanette Maier  
Lisa Maier  
Raina Maier  
Werner Maier  
Wolfgang Maier  
Klaus Hermann Maier-Hein  
Andreas Maieron  
Maxime Maignan  
David Maij  
Nicolas Maillard  
Gary Maillet  
Marjorie Maillet  
Arnaud Mailleux  
Ryan Mailloux  
Russell Main  
Daniel Maina  
Pier Paolo Mainenti  
Caterina Mainero  
Philippe Maingon  
Joel Mainland  
Mark C. Mainwaring  
Tatiani Maioli  
Luigi Maiorano  
Eva Maire  
Nicolas Maire  
Tim Maisch  
John Maisey  
Vimal Maisuria  
Hiroshi Maita  
Shishir Maithel  
Mrinal Maiti  
Nikhil Kumar Maiti  
Panchanan Maiti  
Kristen Maitland  
Arindam Maitra  
Sudipta Maitra  
Blandine Maitre  
N. Maitre  
Nathalie Maitre  
Matthias Maiwald  
Frank Maixner  
Aleksandra Majchrzak-Celinska  
Marek Majdan  
Antonio Majdandzic

Jasminka Majdandžic  
Waqar Majeed  
Mark Majesky  
Shahana Majid  
Bonaventura Majolo  
Danielle Majoor-Krakauer  
Amy Major  
Marian Major  
Matthew Major  
Laszlo Majoros  
Shannon Majowicz  
Muhammad Majrooh  
Ireneusz Majsterek  
Claudio Majul  
Adhip Majumdar  
Indrajit Majumdar  
Mala Majumdar  
Sanghamitra Majumdar  
Subeer Majumdar  
Subrata Majumdar  
Amita Majumder  
Mrinmoyee Majumder  
Paromita Majumder  
Sadhan Majumder  
Alan Mak  
Donna Mak  
Susanna Mak  
Vincent Mak  
Azure Makadzange  
Maja M. Makagon  
Peter Makai  
Kepher Makambi  
Prestige Makanga  
Mariano Makara  
Helen Makarenkova  
Evgeny Makarov  
Slobodan Makarov  
Balahan Makay  
Paul Makdissi  
Miia Mäkelä  
Pirjo Mäkelä  
Nodar Makharashvili  
George Makhatadze  
James Maki  
Satoshi Maki  
Takakuni Maki  
Ermei Mäkilä  
Tamar Makin  
Oluwole Daniel Makinde  
Tajja Makinen  
Veli Makinen

Ville-Petteri Makinen  
Shinji Makino  
Toshiaki Makino  
Wataru Makino  
Akifumi Makita  
Karim Makkawi  
M. Makki  
András Makó  
Mokhantso Makoae  
Yoshida Makoto  
Amber Makowicz  
I. Joanna Makowska  
Liza Makowski  
László Makra  
Evgenia Makrantonaki  
Manousos Makridakis  
Christos Makris  
Konstantinos Makris  
Stergios Makris  
Hernán Makse  
Mohammad Maktoomi  
Jan Makurat  
Maria Makuwa  
Magdalena Malachowicz  
Mokenge Malafa  
Davide Malagoli  
María Malagón  
Pamella Malagrino  
Willy Malaisse  
Laurence Malandrin  
Stefanie Malan-Müller  
Umberto Malapelle  
Ceila Malaque  
Natalia Malara  
David Malaspina  
Manuela Malatesta  
Krishnamurthy Malathi  
E.M Malathy  
Lorenzo Malatino  
Nuria Malats  
Aduli Malau-Aduli  
Stéfano Malavasi  
Iran Malavazi  
Alexis Malavazos  
Jerry Malayer  
Marzia Malcangio  
Sebastian Malchow  
Hamish Malcolm  
Stephen Malcolm  
Frank Maldarelli  
Stephen Malden

Edio Maldonado  
Eduardo Maldonado  
Carmen Maldonado-Bernal  
Yurixhi Maldonado-López  
Ian Male  
Teresa Malecka-Massaslka  
Kristen Malecki  
Goldis Malek  
Naveed Malek  
Sami Malek  
Thomas Malek  
Michael Malek-Ahmadi  
Mahsa Malekmohammadi  
Arati Maleku  
Charles Malemud  
René Malenfant  
Mario Malerba  
Kenneth Maleta  
Jozsef Malet  
M. Malet-Martino  
Fransiska Malfait  
Angela Malheiros  
Harmeet Malhi  
Ripan Malhi  
Nawar Malhis  
Anshu Malhotra  
Arun Malhotra  
Bansi Malhotra  
Deepak Malhotra  
Indu Malhotra  
Neena Malhotra  
Samir Malhotra  
Surbhi Malhotra-Kumar  
Sladjana Malic  
Patricia Malico Alexandre  
Pal Maliga  
Kauser Malik  
Marek Malik  
Neil Malik  
Richard Malik  
Ruchi Malik  
Tanu Malik  
Vasanti Malik  
Waqar Malik  
Zaki Malik  
Lenka Malikova  
Steven Malin  
Tommi Malinen  
Andrei Malinovschi  
Kristina Malinovskaja  
Manuel Maliqueo

Robert Malison  
Agustina Malizia  
David Malkin  
Sebastian Malkusch  
Francesca Mallamaci  
Kimberley Mallan  
Surya Mallapragada  
Carina Mallard  
Simonette Mallard  
Maria Mallardo  
Jihad Mallat  
Ziad Mallat  
Eva Malle  
Jennie Mallela  
Benoit Malleret  
Clément Mallet  
Robert Mallet  
Andrew Mallett  
Sue Mallett  
Roland Malli  
Luca Mallia  
Patrick Mallia  
Ujjal Mallick  
Hari Mallidi  
Karthik Mallilankaraman  
Rachel Mallinger  
Sandeep Mallipattu  
Fedirico Mallo  
David Mallon  
Jordan Mallon  
Nuria Mallorquí-Bagué  
Conor Mallory  
Ellen Mallory  
George Mallory  
Carol Mallory-Smith  
Allison Malloy  
Sneha Mallya  
Noah Malmstadt  
Andras Malnasi-Csizmadia  
Bettina Malnic  
Ailish Malone  
Brendan Malone  
David Malone  
James Malone  
Christopher Maloney  
Ryan Maloney  
Anna Malovannaya  
Gertraud Malsiner-Walli  
Maira Malta  
Monica Malta  
Jansen Malte

Adam Maltese  
Jessica Maltha  
João Malva  
Amir Malvandi  
Mauro Malve  
Matteo Malvezzi  
Paolo Malvezzi  
Anna Malykhina  
Khursheed Mama  
Adamantios Mamais  
Ioannis Mamais  
David Maman  
Mamas Mamas  
Lisley Mambelli  
Muhammad Mamdani  
Adam Mamelak  
Chiara Mameli  
Sujan Mamidi  
Arvydas Maminishkis  
Joshua Mammen  
Manoj Mammen  
Caterina Mammina  
Akiko Mammoto  
Tadanori Mammoto  
Hassen Mamo  
Rogemar Mamon  
Emanuelle Mamroud  
Manju Mamtani  
Hadii Mamudu  
Célia Manaia  
Efrosyni Manali  
Mark Manary  
Justen Manasa  
Steven Manchester  
Laxmaiah Manchikanti  
Francesca Mancianti  
Anthony Mancini  
Elena Mancini  
Gianni Mancini  
Manuela Mancini  
Falk Mancke  
Giuseppe Manco  
L. Manco  
Massimo Mancone  
Mauro Manconi  
Patrizia Mancuso  
Peter Mancuso  
Raivo Mänd  
Abhyuday Mandal  
Atin Mandal  
Chandi C. Mandal

Diptasri Mandal  
Nripendranath Mandal  
Sandip Mandal  
Supreet Mandala  
Sundhiya Mandalia  
Carlos Mandarim-de-Lacerda  
Jeffrey Mandel  
Jeffrey H. Mandel  
Jennifer Mandel  
Mark Mandel  
Roi Mandel  
Jennifer Mandelbaum  
Michal Mandelboim  
Arthur Mandelin  
Jami Mandelin  
Erica Mandell  
Samuel Mandell  
Ulo Mander  
Sandy Mandic  
James Mandigo  
Pierre Mandin  
Judith Mandl  
Kenneth Mandl  
Giuseppe Mandolino  
Mattias Mandorfer  
Giuseppe Mandraffino  
Pranoti Mandrekar  
Mauro Mandrioli  
Antonia Manduca  
Francis Mandy  
Chitra Mandyam  
Adrian Manea  
Kittipong Maneechotesuwan  
L. Manenti  
Nathan Manes  
Zoi Manesi  
Nicholas Maness  
Mirko Manetti  
Giovanni Manfredi  
Pablo Manfredi  
Piero Manfredi  
Michael Manfredo  
Vinicio Manfrin  
Andrea Manfrinati  
Olivia Manfrini  
Roberto Manfro  
Cameron Mang  
Sharad Mangal  
Vidya Mangala Prasad  
Ashutosh Mangalam  
Nilam Mangalmurti

Nitin Mangalvedhe  
Sara Manganelli  
J. A. Manganello  
Stefano Mangani  
Carlo Mangano  
Francesco Mangano  
Philippe Mangeot  
Altaf Mangera  
Peter Mangesho  
Fabio Mangiacapra  
Giuseppe Mangialardi  
Brigitte Mangin  
Paulo Mangini  
Martin Mangino  
Emily Mangone  
Marco Mangone  
Arduino Mangoni  
Maria Luisa Mangoni  
Lara Mangravite  
Sangeeta Mangubhai  
Mary Kate Manhard  
Lisa Manhart  
Chinnadurai Mani  
Nivedita Mani  
Jayanti Mania-Pramanik  
Santhakumar Manicassamy  
Chaysavanh Manichanh  
Cordelia Manickam  
Alagu Manickavelu  
Anne Manicone  
Serge Manie  
P Manikandan  
Elena Manini  
Alexandre Manirakiza  
Juliane Manitz  
Elias Manjarrez  
Mohd Manji  
Paul Manka  
Gauri Mankekar  
Justin Mankin  
Richard Mankin  
Jamel Mankouri  
Robert Mankowski  
Bradley Manktelow  
Andrew Manley  
Kezia Manlove  
Brian Mann  
David Mann  
Dean Mann  
Fanny Mann  
Jake Mann

John Mann  
Karlheinz Mann  
Mellissa Mann  
Zoe Mann  
Adhar Manna  
Prasenjit Manna  
Inge Mannaerts  
Ilaria Mannazzu  
Bhanukanth Manne  
Jennifer Manne  
Claudia Männel  
Paolo Mannelli  
Jörg Männer  
Kaisa Mannerkorpi  
Steve Mannheimer  
Franz Manni  
Amity Manning  
Shannon Manning  
David Mannino  
Gaia Mannino  
Marcello Mannino  
Melissa Mannion  
Peter Mannon  
Trish Manns  
Yoshiro Mano  
Catherine Manoha  
Aswin Manohar  
Murli Manohar  
Muthu Saravanan Manoharan  
Narayanan Manoj  
Spililios Manolakopoulos  
Irin Manoli  
Ayumi Manome  
Poramate Manoonpong  
Carrie Manore  
Melinda Manore  
Ali Manouchehrinia  
Nicholas Manoukis  
Arjun Manrai  
Aruna Manrakhan  
German Manríquez  
Norma Manríquez-Morán  
Janet Mans  
Steve Mansberger  
Gemma Mansell  
Gordon Mansergh  
Aaron Mansfield  
Avril Mansfield  
Elise Mansfield  
Jen Mansfield  
Jessica Mansfield

Kate Mansfield  
Kim Mansky  
Joseph Manson  
Michael Manson  
Steven Manson  
Adnan Mansoor  
Hameed Mansoor  
Lucia Manso-Silvan  
Maedeh Mansoubi  
Ahmad Mansour  
Hani Mansour  
Ahmed Mansouri  
Alf Månsson  
Luis Manssuer  
Leticia Mansur  
Jean-Michel Mansuy  
Massimo Mantegazza  
Renato Mantegazza  
Fernando Mantelatto  
Lin L. Mantell  
Aukje Mantel-Teeuwisse  
Daniel Manter  
Carlos Mantilla  
César Mantilla  
Christa Manton  
David Manton  
Alberto Mantovani  
Roberto Mantovani  
Shrikant Mantri  
Christopher Mantyh  
Patrick Mantyh  
Dimitra Mantzouka  
Candida Manuel  
Jennifer Manuel  
Oriol Manuel  
Remy Manuel  
Paolo Manunta  
Solichin Manuri  
Jennifer Manuzak  
Catriona Manville  
Christy Manyi-Loh  
K. Manz  
Rudolf Manz  
W. Manzanares  
R. Manzanaras  
Antonio Manzaneda  
Edgar Manzanilla  
Glen Manzano  
Raquel Manzano Martinez  
Ann Manzardo  
Enzo Manzato

Giancarlo Manzi  
Laura Manzo  
Claudia Manzoni  
Nikhat Manzoor  
Binchen Mao  
En-Qiang Mao  
Gaowei Mao  
Hui Mao  
Jiafu Mao  
Jian-Feng Mao  
Kangshan Mao  
Limi Mao  
Qi Mao  
Ri.Cheng Mao  
Shu Mao  
Weiming Mao  
Weiyu Mao  
Yinghui Mao  
Yubin Mao  
Zhiyong Mao  
Tonderai Mapako  
Rudo Mapanga  
Francesca Mapelli  
Jill Maples  
Salwan Maqdasy  
Pierre Olivier Maquart  
Lochner Marais  
Panagiotis Marakos  
Avudaiappan Maran  
Christa Marandino  
Dario Marangoni  
Teodoro Marañon  
Athanasios Maras  
Felipe Maraschin  
Ramona Marasco  
Sayed-Amir Marashi  
Anna Maria Marata  
Nachiket Marathe  
Eleftheria Maratos-Flier  
Alessandro Maravalle  
Antonio Maraver  
Pablo Maravilla  
Aniko Maraz  
Monica Marazuela  
Maria Cristina Marazzi  
Moreno Marazzi  
Daniel Marbach  
Eduardo Marbán  
Daniel Marc  
Robert Marc  
Matteo Marcantonio

Paola Marcato  
Louis Marceau  
Michael Marceau  
Jasmine Marcelin  
La Noce Marcella  
Elena Marcello  
Alessandro Marcengo  
Alexadre Marceniuk  
Arnald Marcer  
Brice Marcet  
Frederic Marchal  
Cyril Marchand  
Fabien Marchand  
Justine Marchand  
Serge Marchand  
Veronique Marchand-Pauvert  
Gary Marchant  
Alessandro Marchese  
Giulio Marchese  
Federica Marchesi  
Giulio Marchesini  
Silvia Marchesotti  
Dario Marchetti  
Giulia Marchetti  
Michael Marchetti  
Philippe Marchetti  
Piero Marchetti  
Rosa Marchetti  
Martina Marchetti-Deschmann  
Paolo Marchettini  
Nicola Marchi  
Nina Marchi  
Timoteo Marchini  
Caterina Marchio  
Serena Marchio  
Davide Marchiori  
Paola Marchisio  
Douglas Marchuk  
David Marciano  
Arlei Marcili  
Pawel Marciniak  
Stefan Marciniak  
Ludmila Marcinowicz  
Adrian Marciszak  
Beato Marco  
Francisco Marco  
Milena Marcolino  
Luciano Marcon  
Fernanda Marcondes  
Rodrigo Marcondes  
Sisi Marcondes

Gianpiero Marconi  
Vincent Marconi  
Marcos  
Fabrizio Marcucci  
Lorenzo Marcucci  
Carole Marcus  
Jeffrey Marcus  
Ulrich Marcus  
Cecile Marczinski  
Karim Mardani  
Stefania Mardente  
Adil Mardinoglu  
Gonzalo Mardones  
Curtis Marean  
František Marec  
Eric Marechal  
Jean-Didier Maréchal  
Thomas Mareci  
Edson Mareco  
Hans Maree  
Roger Marek  
Marc Marena  
Barbara Marengo  
Olga Mareninova  
Julie Mares  
Pavel Mares  
Andrea Maresca  
Marc Maresca  
Isabelle Mareschal  
Jennifer Maresh  
Thorsten Maretzky  
Mary Marfori Christie  
Jutta Marfurt  
Paolo Margaria  
Nikos Margaritelis  
Paris Margaritis  
G. Margaritopoulos  
John Margaritopoulos  
Andrew Margenot  
Marta Margeta  
Peter Margetts  
Kim Margolin  
William Margolin  
David Margolis  
Gabriele Margos  
Jean-Luc Margot  
Samuel Marguerat  
Raphael Margueron  
Elizabeth Margulis  
Karol Marhold  
Zoltan Mari

Neus Mari Mena  
Mahendra Mariadassou  
Babu Mariadoss  
Francesca Mariani  
Massimiliano Mariani  
Patrizio Mariani  
Thomas Mariani  
Marichelvam Mariappan Kadarkarainadar  
Jean Mariaux  
Brian Maricle  
Boudsocq Marie  
Garcia Marie-Isabelle  
Hans Marien  
Peter Mariën  
Eric Marietta  
Christophe Mariette  
Mylene Mariette  
Maria A Marigiò  
Romain Marignier  
Ionan Marigomez  
Urko Marigorta  
Tatiane Mariguela  
Pericic Salihovic Marijana  
Eloi Marijon  
José Maria Marimon  
Catherine Marimoutou  
Mohan Marimuthu  
Bóris Marin  
Jose Marin  
Maria Marin  
Michel Marin  
Francisco Marín  
Anthony Marinaki  
Ferenc Marincs  
Daniel Marinho  
Francesco Marini  
Maddalena Marini  
Rich Marini  
Angela Marino  
Daniel Marino  
Francesco Marino  
Jennifer Marino  
Lori Marino  
Maria Marino  
Tiziana Marino  
Eliana Mariño  
Guillermo Mariño  
Ines Mariño  
Ismael Mariño  
Cristina Marino Buslje  
Antonella Marino Gammazza

Georgi Marinov  
Welber Marinovic  
Luyat Marion  
Céline Marionneau  
François Mariotti  
Marco Mariotti  
Encarnita Mariotti-Ferrandiz  
Christine Maritz-Olivier  
Lilian Mariutti  
Jose Mariz  
Sadie Marjani  
David Marjanovic  
Varpu Marjomaki  
Christie Mark  
Faries Mark  
Patrick B. Mark  
Paul Marker  
Sebastian Markett  
Charlotte Markey  
Kate Markey  
Michael Markey  
Patrick Markey  
Margaret Markiewicz  
Erik Marklund  
Doris Marko  
Lajos Marko  
Mollie Marko  
Peter Marko  
Melissa Markofski  
Desalegn Markos  
Maria Markoulli  
Eleni Markoutsas  
Gabriel Markov  
Milica Markovic  
Silvana Markovska-Simoska  
Therese Markow  
Beth Marks  
Bonita Marks  
Donald Marks  
Florian Marks  
Jennifer Marks  
Kathie Marks  
Michael Marks  
Ray Marks  
Stanley Marks  
Burgmer Markus  
Valentina Markusova  
Thor Nygaard Markussen  
Matthew Marlay  
Ferdinand Marlétaz  
W. Marlicz

Jeffrey Marlow  
Srinivas Marmamula  
Roland Marmeisse  
Nelson Marmioli  
R. Marmo  
Adam Marmon  
Miriam Marmontel  
Bradley Maron  
Luca Maroni  
Gergely Maróti  
Vincenzo Marotta  
Brian Marples  
David Marples  
Nicola Marples  
Andre Marquand  
Quentin Marquant  
Gregory Marquart  
Catherine Marque  
Adilson Marques  
Catarina Marques  
Fernanda Marques  
Joao Marques  
Joao Tiago Marques  
Joaquim Marques  
Márcia Maria Marques  
Marcia Martins Marques  
Maria Marques  
Mario Marques  
Miriam Marques  
Oriana Marques  
Patricia Marques  
Sonia Marques  
Tiago Marques  
Idoia Marqués-Iturria  
Pierre Marquet  
Rafael Marquez  
Johann Marquez-Barja  
María Marquine  
Robert Marquis  
Flavia Marquitti  
Robert Marr  
Alexandre Marra  
Camillo Marra  
Kacey Marra  
Paolo Marra  
Michel Marre  
João Marreiros  
Emmanuel Marret  
Stéphane Marret  
Thomas Marrie  
Kelly Marrin

Gaetano Marrone  
Giusi Marrone  
Oreste Marrone  
Fabio Marroni  
Carl Marrs  
Glenn Marrs  
Lennart Mars  
Martin Marsala  
Peter Marschang  
Rachel Marschang  
Gunther Marsche  
Barry Marsden  
Islay Marsden  
Janet Marsden  
John Marsden  
Matthew Marsden  
Elliot Marseille  
Anthony Marsh  
Glenn Marsh  
Peter Marsh  
Samantha Marsh  
Wallis Marsh  
Aaron Marshall  
Andrew Marshall  
Brandon Marshall  
Jennifer Marshall  
John Marshall  
Julian Marshall  
Katie Marshall  
Lynn Marshall  
Mark Marshall  
Steve Marshall  
Tara Marshall  
Sonya Marshall-Gradisnik  
Zoe Marshman  
Michael Marsiske  
Marie-Claude Marsolier-Kergoat  
Laurent Marsollier  
Lukas Eugen Marsoner Steinkasserer  
Denise Marston  
Marta Marszalek  
Bosia Marta  
Carlos Marta  
Enzo Martegani  
An Martel  
Jan Martel  
Sylvain Martel  
Frank Martela  
Alberto Martelli  
Francesca Martelli  
Pier Luigi Martelli

Kirill Martemyanov  
Johannes Martens  
Jonas Martens  
Elena Martens-Uzunova  
Christina Marth  
Amelia Marti  
Hans-Peter Marti  
Joan Marti  
Melanie Marti  
Sara Marti  
Janne Martikainen  
Alberto Martin  
Allan Martin  
Allison Martin  
Anne-Celine Martin  
Arnaud Martin  
Bradley Martin  
Carlos Martin  
Cesar Martin  
Charles Martin  
Christian Martin  
Christina Martin  
Damali Martin  
Daniel Martin  
Denis Martin  
Donel Martin  
Donna Martin  
Douglas Martin  
Eileen Martin  
Emily Martin  
Estelle Martin  
Fabiola Martin  
Francis Martin  
Francisco Martin  
Francois-Pierre Martin  
Georg Martin  
Gerardo Martin  
Glynn Martin  
Gregory Martin  
James Martin  
Janet Martin  
Javier Martin  
Jean-Rene Martin  
Jérémy Martin  
John Martin  
Juan Martin  
Julien Martin  
Kathy Martin  
Kendall Martin  
Lana Martin  
Lance Martin

Loren Martin  
Marcel Martin  
Maria J. Martin  
Mario Martin  
Meghan Martin  
Michael Martin  
Miguel Martin  
Olivier Martin  
Pablo Martin  
Patrick Martin  
Priya Martin  
Randy Martin  
Regina Martin  
Robert Martin  
Samuel Martin  
Seth Martin  
Tammy Martin  
Thomas Martin  
Tom Martin  
Travis Martin  
Francisco Martín  
Margarita Martín  
Carlos Martín Ardila  
Tamara Martin Gimenez  
Joan Martin Montaner  
Camille Martina  
Jose Martina  
Boris Martinac  
Aaron Martin-Alonso  
Beatriz Martin-Antonio  
Santiago Martín-Bravo  
Juan Martin-Caballero  
Miguel Martin-Caraballo  
Sanda Martincic-Ipsic  
Ruben Martin-Clemente  
Ana-Belen Martin-Cuadrado  
José Martín-Durán  
Joe Martineau  
Tim Martineau  
Jan Martinec  
Axel Martinelli  
Elena Martinelli  
Erika Martinelli  
Marcella Martinelli  
Paola Martinelli  
Pasquale Martinelli  
Marianne Martinello  
Guillaume Martinent  
Laetitia Martinerie  
Edoardo Martinetto  
Aline Martinez

Ari Martinez  
Chris Martinez  
Ciera Martinez  
Darwin Martinez  
Denis Martinez  
Diego Martinez  
Esteban Martinez  
Fernando Martinez  
Francisco Martinez  
Gustavo Martinez  
Jayson Martinez  
Jessica Martinez  
Leandro Martinez  
Leonardo Martinez  
Luis Martinez  
Manuel Martinez  
Maria Carmen Martinez  
Neus Martinez  
Octavio Martinez  
Rafael Martinez  
Ramses Martinez  
Salvador Martinez  
Vicente Martinez  
Victor Martinez  
Agustín Martínez  
Ana Martínez  
Carmen Martínez  
José Martínez  
Lara Martínez  
Miguel Ángel Martínez  
Octavio Martínez  
Alejandro Martinez Bueno  
Gonzalo Martinez Fernandez  
Miguel Martínez González  
Johann Heinz Martinez Huartos  
Xavier Martinez Lacasa  
Agustin Martinez Molina  
Eduarne Martínez Moreno  
Guillermo Martínez Pérez  
Claudia Martínez-Anaya  
Olga Martínez-Augustin  
Jesús Martínez-Barnetche  
Roberto Martínez-Beamonte  
Jose Martinez-Costas  
Miguel Ángel Martinez-del-Amor  
Luis Martínez-Dolz  
Ana Martinez-Donate  
Flor Martinez-Espinosa  
Antonio Martínez-Fuentes  
M.A. Martinez-Garcia  
Blanca Martinez-Garriga

Luis Martinez-Gil  
Pedro Martínez-Gómez  
Maite Martínez-Granado  
José Armando Martínez-Guarneros  
Pablo Martinez-Legazpi  
Luis Martinez-Lemus  
Enrique Martínez-Meyer  
Eduardo Martínez-Montes  
Juan Martínez-Pinna  
Daniel Martinez-Ramirez  
Javier Martínez-Reina  
Esperanza Martinez-Romero  
Carlos Martinez-Salgado  
Aida Martinez-Sanchez  
Eduardo Martinez-Valdes  
Inigo Martinez-Zubiaurre  
Raquel Martín-Hernández  
Pierre Martin-Hirsch  
Frederico Martinho  
Olga Martinho  
Andrea Martini  
Claudia Martini  
Filippo Maria Martini  
Rudolf Martini  
Severine Martini  
Alexandre Martinière  
Natália Martínková  
Alejandro Martin-Montalvo  
José Martín-Nieto  
David Martino  
Davide Martino  
Giovanni Martino  
Mikaël Martino  
Rosemary Martino  
Frédéric Martinon  
A. Martin-Padillos  
Ines Martin-Padura  
Raúl Martín-Palma  
Ademir Martins  
Alexandra Martins  
Ana Martins  
André Martins  
Antonio Martins  
Bruno Martins  
Carlos Henrique Martins  
Cesar Martins  
Elisabete Martins  
Gustavo Martins  
Helio Martins  
João Martins  
Lourdes Martins

Rodrigo Martins  
Samuel Martins  
Viviana Martins  
Wellington Martins  
Yuri Martins  
Sheryl Martin-Schild  
Brian Martinson  
Jeremy Martinson  
Vince Martinson  
Marli Martins-Pinge  
Lisa Martinsson  
Daniel Martin-Vega  
Jose-Luis Martin-Ventura  
Adam Martiny  
Jennifer Martiny  
Araks Martirosyan  
Nikolay Martirosyan  
Christopher Martius  
Erwin Märtlbauer  
Zsolt Mártonfalvi  
Francesca Martora  
Reynaldo Martorell  
Jeffrey Martus  
Regina Martuscello  
Alexander Martynov  
Anatoly Martynyuk  
Lucia Marucci  
Liliana Marum  
Takeshi Marumo  
James Maruniak  
Antonello Maruotti  
Hiroyuki Marusawa  
Jaroslaw Marusiak  
Uros Marusic  
Ana Marušić  
Karen Maruska  
Shinsaku Maruta  
Eizo Marutani  
Fumito Maruyama  
Hiroki Maruyama  
Jun-ichi Maruyama  
Koutatsu Maruyama  
Mitsunori Maruyama  
Yukio Maruyama  
Adriana Marvaldi  
Paul Marvar  
Giulia Marvaso  
Hamid Marvi  
Mohamed Marwan  
Gary Marx  
Steven Marx

Alison Mary  
Cristina Marzachi  
Shin-Yi Lee Marzano  
Caren Marzban  
Hassan Marzban  
Lucy Marzban  
Emanuele Marzetti  
Andrea Marzi  
Ingo Marzi  
Stefano Marzi  
Tessa Marzi  
Mario Marzilli  
Jan Marzinek  
Ezequiel Marzinelli  
Martin Marziniak  
Marco Marzioni  
Mary Marzke  
William Marzluff  
Stefania Marzocco  
Gemma Mas de Xaxars  
Atsushi Masamune  
Honorati Masanja  
Segula Masaphy  
Mario Masarone  
Laurent Mascarell  
Françoise Mascart  
Celine Mascaux  
Julia Mascherbauer  
Ulrich Maschwitz  
Silvina Masciotra  
Joe Masdeu  
Masaji Mase  
Pavel Masek  
Bernd Masepohl  
Renato Maserati  
Rosalinde Masereeuw  
Jose Masero  
Biancaelena Maserti  
Linnet Masese  
Bob Mash  
Deborah Mash  
Tivani Mashamba-Thompson  
Felistas Mashinya  
Rahia Mashoodh  
Saidur Mashreky  
Muriel Masi  
Moses Masika  
Matilde Masini  
Felix Masiye  
Cheryl Maslen  
Dana Maslovat

Carlos Mas-Moruno  
Saber Masmoudi  
Isabelle Masneuf  
Gianpaolo Maso  
Cristina Masoller  
Carl Mason  
Charlie Mason  
Craig Mason  
Hugh Mason  
Jeffrey Mason  
Kevin Mason  
Linda Mason  
Neil Mason  
Nicola Mason  
Peggy Mason  
Ralph Mason  
Richard Mason  
Robert Mason  
Robin Mason  
Sarah Mason  
Shaun Mason  
William Mason  
Sajid Masood  
Hassan Masoud  
Mohamed Masoud  
Ali Masoudi-Nejad  
Bruno Masquelier  
Tali Mass  
Àlex Mas-Sandoval  
Serge Massar  
Judy Massare  
Paola Massari  
Emanuele Massaro  
Benoit Masse  
Eric Masse  
Jana Masselink  
Jorg Massen  
Andrew Massey  
P.R. Massey  
Ruth Massey  
Allan Massie  
Charlie Massie  
Lourdes Massieu  
Chandirasegaran Massilamany  
Tattini Massimiliano  
Mathieu Massinon  
Pierre Massion  
Silvia Massironi  
Ingrid Masson  
Jean-Baptiste Masson  
Serge Masson

Tarik Massoud  
Patricia Masso-Welch  
Francesco Massucci  
Nicola Massy-Westropp  
Susan Masta  
Nikolaos Mastellos  
Emma Master  
Forrest Masters  
William Masters  
Grant Mastick  
Svetlana Mastitskaya  
Teresa Mastracci  
Lucy Mastrandrea  
Anna Maria Mastrangelo  
Salvatore Mastrangelo  
Claudio Mastroianni  
Gianna Mastroianni Kirsztajn  
Salvatore Andrea Mastroli  
Gabriela Mastromonaco  
Angela Mastronuzzi  
Francesco Mastrototaro  
Lisa Masucci  
Tahsin Masud  
Munetaka Masuda  
Ryuichi Masuda  
Satohiro Masuda  
Tatsuru Masuda  
Gwinyai Masukume  
Kazuko Masuo  
Howard Masuoka  
Shazia Masus  
Chikara Masuta  
Ignacio Mata  
Manuel Mata  
Sara Mata  
Eugenia Mata-Greenwood  
Eva Matalova  
Miriam Matamales  
Valerie Matarese  
Bashir Matata  
Victor Mateevitsi  
José Luis Maté-Muñoz  
Pilar Mateo  
Rafael Mateo  
Rocio Mateo-Gallego  
Ana Mateos  
Luis Mateos  
Mariana Mateos  
Maria-Victoria Mateos  
Pablo Mateos  
Manuela Matesan

Enric Mateu  
Guillermo Mateu  
Mauricio Mateu  
Nohra Mateus-Pinilla  
Ewy Mathe  
Anthony Mathelier  
Ashley Matheny  
Amanda Mather  
Karen Mather  
Kieren Mather  
Melissa Mather  
William Mather  
Colin Mathers  
Jonathan Mathers  
Kate Mathers  
Ulrike Mathesius  
Anuja Mathew  
Ashish Mathew  
Ginson Mathew  
Mathew T. Mathew  
Oommen Mathew  
Remy Mathew  
Adam Mathews  
Clayton Mathews  
Debra Mathews  
Maureen Mathews  
Michael Mathews  
Sarah Mathews  
Zmita Mathews  
Heather Mathewson  
Bernard Mathey-Prevot  
Lydia Mathger  
Clinton Mathias  
Paula Mathiasen  
Candace Mathiason  
Alistair Mathie  
Patrick Mathieu  
Veronique Mathieu  
Sebastiaan Mathôt  
Archana Mathur  
Manu Mathur  
Maya Mathur  
Purva Mathur  
Sameer Mathur  
Sunita Mathur  
Christian Mathys  
Isabelle Matias  
Miguel Matias  
Jordi A. Matias-Guiu  
Marie Matignon  
Alexis Matikas

Mariano Matilla-Garcia  
Maryam Matin  
Cleverson Matioli  
Gabor Matis  
Daniel Matisoff  
Janos Matko  
Scot Matkovich  
José Mato  
Susana Mato  
Tetsuya Matoba  
Olga Matos  
Andreas Matouschek  
Joseph Matovu  
Takashi Matozaki  
Carmela Matrone  
Michael Matschiner  
Cindy Matsen  
Hidenori Matsubara  
Ikki Matsuda  
Ken-Ichi Matsuda  
Koichi Matsuda  
S. Matsuda  
Shinji Matsuda  
Tadashi Matsuda  
Tetsuya Matsuguchi  
Elizabeth Matsui  
Hiroshi Matsui  
Reiko Matsui  
Chisa Matsumoto  
Chota Matsumoto  
David Matsumoto  
Gen Matsumoto  
George Matsumoto  
Hidetaka Matsumoto  
Hiroyuki Matsumoto  
Isao Matsumoto  
Kazumasa Matsumoto  
Kazunori Matsumoto  
Ken Matsumoto  
Kunihiro Matsumoto  
Kunio Matsumoto  
Takashi Matsumoto  
Takuya Matsumoto  
Yasuharu Matsumoto  
Yasuhiko Matsumoto  
Yoh Matsumoto  
Yoshihisa Matsumoto  
Hirofumi Matsumura  
Takeshi Matsumura  
Tsuyoshi Matsumura  
Yasufumi Matsumura

James Matsunaga  
Sachihiro Matsunaga  
Keita Matsuno  
Michinori Matsuo  
T. Matsuo  
Hiroyuki Matsuoka  
Makoto Matsuoka  
Shin Matsuoka  
Kazuyuki Matsushita  
Cristiane Matsuura  
Eiji Matsuura  
Keita Matsuura  
Motokazu Matsuura  
Y. Matsuura  
Ryota Matsuyama  
Shigemi Matsuyama  
Takatoshi Matsuyama  
Hideo Matsuzaki  
Yoko Matsuzaki  
Omar Mohamed Mattar  
Ursula Matte  
Facundo Mattea  
Alberto Matteelli  
Denise Mattei  
Michelle Matter  
Thomas Mattern  
Joerg Mattes  
Andrea Mattevi  
Mario Matthaei  
Richard Matthew  
Alison Matthews  
Brya Matthews  
Elizabeth Matthews  
Geoffrey Matthews  
Gregory Matthews  
Jason Matthews  
Karen Matthews  
Keith Matthews  
Naomi Matthews  
Peter Matthews  
R.W. Matthews  
Stephen Matthews  
Tony Matthews  
William Matthews  
Stephen Matthey  
Suzette Matthijsse  
Patrick Matthys  
Gianfranco Mattia  
Maurizio Mattia  
Heather Mattila  
Joshua Mattila

W. Brett Mattingly  
Monica Mattioli-Belmonte  
Aras Mattis  
Siobhán Mattison  
Simonetta Mattiucci  
Holly Mattix-Kramer  
Sarah Mattonen  
Camilo Mattoni  
Carla Mattos  
Garrett Mattos  
Dirceu Mattos Jr.  
Douglas Mattox  
Robert Matts  
Neil Mattson  
Sarah Mattson  
Sven Mattys  
Giuseppe Matullo  
Anke Matura  
David Matus  
Daniel Matute  
Gustavo Matute-Bello  
Karen Matvienko-Sikar  
Csaba Matyas  
Sarah Matyjaszek  
A. Matynia  
Karl Matz  
Sandra Matz  
Manolis Matzapetakis  
Louis Matzel  
Nick Matzke  
Felix Mauch  
Carmelo Maucieri  
Andrew Maudsley  
Volker Mauerhofer  
Gersende Maugars  
Florence Mauger  
Jeff Maughan  
Maximilian Mauler  
Michael Maulucci  
Jonathan Maupin  
Julie Maupin-Furlow  
Joan Maurel  
Andrew Maurer  
Christoph Maurer  
Joachim Maurer  
Jurgen Maurer  
Kirk Maurer  
Peter Maurer  
Uli Maurer  
Urs Maurer  
Mathias Mäurer

Sebastian Maurer-Stroh  
Marco Mauri  
Donald Maurice  
Michèle Maurice  
Thomas Maurin  
Marguerite Mauritz  
Annunziata Mauro  
Theodora Mauro  
Pál Maurovich-Horvat  
Wendy Maury  
Ashish Maurya  
Carlos Mautalen  
Nasim Mavaddat  
Vidya Mave  
Fabio Mavelli  
Uroš Maver  
Laurent Maveyraud  
A.H. Mavhandu-Mudzusi  
Webster Mavhu  
Nirmala Mavila  
Kenneth Mavor  
Clio Mavragani  
Penelope Mavragani-Tsipidou  
Lazaros Mavridis  
Evgeny Mavrodiev  
Eleni Mavrogonatou  
Sean Maw  
Ludo Max  
Anton Maximov  
Justin Maxwell  
Karen Maxwell  
Toby Maxwell  
Alexis May  
Anne May  
Clive May  
Margaret May  
Meghan May  
Michael May  
Peter May  
Victor May  
Christopher Mayack  
Katerine Mayall  
Oleg Mayboroda  
Laura J. May-Collado  
Peter Maye  
Adam Mayer  
Audrey Mayer  
Bruce Mayer  
Christoph Mayer  
Deborah Mayer  
Gaétan Mayer



Gert Mayer  
Günter Mayer  
Jens Mayer  
Marcos Mayer  
Monique Mayer  
Otto Mayer  
Peter Mayer  
Veronika Mayer  
Heino Mayer-Bahlburg  
Katrin Mayer-Barber  
Marius Mayerhoefer  
Artur Mayerhofer  
Mariana Mayer-Pinto  
Theresa Mayes  
William Mayes  
Anderson Mayfield  
Alexandra Mayhew  
Christopher Mayhorn  
Abdelrahman Mayhoub  
Maskit Maymon  
C. Maynard  
Elizabeth Mayne  
Richard Mayne  
Kevin H. Mayo  
Nancy Mayo  
Maria Mayol  
Karla Mayolo-Deloisa  
Stephen Mayor  
Juan Mayordomo-Colunga  
Mary G. Mayorga  
Evan Mayo-Wilson  
Gerald Mayr  
Philipp Mayr  
Michaela Mayrhofer  
Thomas Mayrhofer  
Michael Mayrhofer-Reinhartshuber  
Darren Mays  
Helen May-Simera  
Edward Maytin  
Nishi Mayumi  
Sylvie Mazan  
Nicholas Mazarakis  
George Mazariegos  
Antonios Mazaris  
Ian Maze  
Mervyn Maze  
Michael Maze  
Didier Mazel  
Marshall Mazepa  
Lorraine Mazerolle  
Fabienne Mazerolles

Marie-Christine Mazon  
T.D. Mazgajski  
Dominique Mazier  
Mikael Mazighi  
Sarkis Mazmanian  
Jean-Xavier Mazoit  
Yariv Mazor  
Michael Mazourek  
Angela L. Mazul  
Barsanjit Mazumder  
Rajarshi Mazumder  
Wojciech Mazur  
Vera Mazurak  
Gerald Mazurek  
Frederic Mazurier  
Emilia Mazza  
Sandro Mazzaferro  
Giuseppe Mazzarella  
Michael Mazzeffi  
Anna Teresa Mazzeo  
Ilaria Mazzini  
Mario Mazzocchi  
Ketti Mazzocco  
Michèle Mazzocco  
Paolo Mazzola  
Silvia Mazzola  
Carlotta Mazzoldi  
Stefano Mazzoleni  
Guillermo Mazzolini  
Annamaria Mazzone  
Davide Mazzoni  
Rosana Mazzoni  
Marco Mazzorana  
Diego Mazzotti  
Niccolo Mazzucco  
Walter Mazzucco  
Elisabetta Mazzucotelli  
Joseph Mazzulli  
Gabriel Mbalaviele  
Godfrey Mbaruku  
Justice Mbizo  
Gerald Mboowa  
Lawrence Mbuagbaw  
Zizipho Mbulawa  
Lazarous Mbulo  
Conor Mc Donnell  
Kathleen Mc Entee  
John Mc Evoy  
Jennifer Mc Sharry  
Colm McAlinden  
Jan McAllister

Lisa McAllister  
Sandra McAllister  
Sean McAllister  
Denise McAloose  
Lisa McAndrew  
Mary McAndrews  
Darragh McArt  
J. McArthur  
Kate McArthur  
Michelle McArthur  
John McAteer  
Julian McAuley  
Julie McAuley  
W. J. McAuley  
Gary McAuliffe  
Joe McAuliffe  
Alex McAvoy  
Andrew McBain  
Karen McBee  
Megan McBee  
Joyce McBeth  
Alan McBride  
Anne McBride  
Dawn McBride  
Jere McBride  
Kevin McBride  
Mark McBride  
Richard McBride  
Shonna McBride  
William McBride  
Keith McBurnett  
Brian McCabe  
Candy McCabe  
Colm McCabe  
Kira McCabe  
Laura R McCabe  
Paul McCabe  
Dominic McCafferty  
Rebecca McCaffery  
Anton McCaffrey  
Jeanne McCaffrey  
Nikki McCaffrey  
Charles McCall  
Jennifer McCall  
K. D. McCall  
Kimberly McCall  
Matthew McCall  
Shawna McCallin  
Ian McCallum  
Sarah McCallum  
Jon McCalmont

Alana McCambridge  
Lynn McCane  
Stewart McCann  
Robert McCarley  
John McCarrey  
Kenneth McCarson  
Cameron McCarthy  
Cathal McCarthy  
Danielle McCarthy  
David McCarthy  
Denis McCarthy  
Elizabeth McCarthy  
Heather McCarthy  
Helen McCarthy  
John McCarthy  
Justin McCarthy  
Peter McCarthy  
Robert McCarthy  
Catherine McCarty  
Douglas McCarty  
Jack McCarty  
Jessica McCarty  
Nael McCarty  
Nami McCarty  
Owen McCarty  
Stacy McCarty  
Geoffrey McCaughan  
Euan McCaughey  
Douglas McCauley  
Laurie McCauley  
Timothy McCavit  
Hilary McClafferty  
Amanda McClain  
Tim McClanahan  
Bruce McClane  
Leigh McClarty  
Penn McClatchey  
Alec McClay  
Michael McClean  
Angela McCleary-Wheeler  
William McClellan  
R. McClelland  
Raymond McClelland  
Robyn McClelland  
David McClements  
Loren McClenachan  
Beverly McClenaghan  
James McClintock  
Peter McClintock  
Karen McCloskey  
Elizabeth McClure

Matthew McClure  
Roderick McClure  
Tristan McClure-Begley  
Stuart McCluskey  
Kenneth E. L. McColl  
Susanna McColley  
Jacalyn McComb  
Mark McComb  
Jonathan McConathy  
Brendan McConkey  
David McConkey  
Bradley McConnell  
David McConnell  
Kevin McConnell  
Margaret McConnell  
Michael McConnell  
Brian McCool  
David McCord  
Gordon McCord  
Ed McCormack  
Koorosh McCormack  
Stephen D. McCormick  
David McCormick  
Samantha McCormick  
Joy McCorriston  
Paul McCoubrie  
James McCoy  
Mark McCoy  
Rajiv McCoy  
Sophie McCoy  
Vance McCracken  
Pierre McCrea  
Aaron McCright  
Rory McCrimmon  
Brian McCrindle  
Jean McCrory  
Megan Ann McCrory  
Robert Duncan McCuaig  
Marshall McCue  
Peter McCullagh  
Christopher A. McCulloch  
Richard McCulloch  
Timothy McCulloch  
Louise McCullough  
Matthew McCullough  
Robert McCullumsmith  
Kevin McCully  
Lorraine McCune  
Donald McCurnin  
J. McCutchan  
Ian McCutcheon

Vivia McCutcheon  
Simon McDade  
Thomas McDade  
Liam McDaid  
Larry McDaniel  
Lee McDaniel  
Michael McDaniel  
Allison McDermott  
Jennifer McDermott  
John C. McDermott  
Paul McDermott  
Robyn McDermott  
Suzanne McDermott  
Brian McDonagh  
Andrew McDonald  
Christine McDonald  
Elizabeth L. McDonald  
Ellie McDonald  
John McDonald  
Kerrie McDonald  
Laura McDonald  
Megan McDonald  
Michael McDonald  
Mike McDonald  
Neville McDonald  
Sarah McDonald  
Scott McDonald  
Adam C McDonnell  
Susan McDonnell  
Timothy McDonnell  
Alicia McDonough  
Ian McDonough  
Suzanne McDonough  
Lotus McDougal  
Graham McDougall  
Andy McDowell  
Mary Ann McDowell  
William McDowell  
Michael McEachern  
Robert McElderry  
Patrick McElduff  
Teresa McElhinny  
Anthony M. McElligott  
James McElnay  
Thomas McElrath  
J. Scott McElroy  
Noel McElvaney  
Donald McElwain  
Sean McElwain  
Mark McEntee  
John McEvoy

Alistair McEwan  
Iain McEwan  
Scott McEwen  
Joseph McFadden  
Sally McFadden  
Amelia McFarland  
Braden McFarland  
Dennis McFarland  
Elizabeth McFarland  
Karen McFarland  
Michael McFarland  
Nikolaus McFarland  
Robert McFarland  
Barbara McFarlin  
Melanie McField  
Patrick McGah  
John McGann  
Patrick McGann  
Kenneth McGarry  
Trudy McGarry  
Stephen McGarvey  
Suzanne McGaugh  
David McGaughey  
Jonathan McGavock  
Aaron McGee  
Lesley McGee  
Monnie McGee  
Richard G. McGee  
Richard McGee Jr.  
Meghan McGee-Lawrence  
J. Graham McGeown  
William McGeown  
James McGettigan  
Helen McGettrick  
George McGhee  
Jodi McGill  
Mitchell R. McGill  
Jessica McGillen  
Amanda McGillivray  
Rowan McGinley  
James McGinnis  
William McGinnis  
Edwina McGlinn  
Rory McGloin  
Chris McGlory  
Ellen McGough  
Alice McGovern  
Mark McGovern  
Naomi McGovern  
Thomas McGovern  
Ian McGowan

Jennifer McGowan  
Suzanne McGowan  
Matthew McGrail  
Maura McGrail  
Catherine McGrath  
Christine McGrath  
Colman McGrath  
Deirdre McGrath  
Margaret McGrath  
Michael McGrath  
Patrick McGrath  
Hillary McGraw  
James McGraw  
Sloane McGraw  
Rose McGready  
William McGreevey  
Morgan McGregor  
Mike McGrew  
William McGrew  
Rankin McGugin  
Betty McGuire  
Grant McGuire  
Kathleen McGuire  
Shawn McGuire  
Leah McHale  
Andrew McHill  
Peter McHugh  
William McIlhagga  
Gerald McInerney  
Michael McInerney  
Colin McInnes  
Eric McInnes  
John McInroy  
John McIntosh  
Michael McIntosh  
Rebecca McIntosh  
Stuart McIntosh  
Joseph McIntyre  
Nancy McIntyre  
Thomas McIntyre  
Trevor McIntyre  
Kathryn McIsaac  
David McIver  
Paul McKay  
Stephanie McKay  
Timothy McKay  
Jack McKay Fletcher  
Martin McKee  
Mehri McKellar  
Duane McKenna  
Leanda McKenna

Sean McKenna  
Cheryl McKenna-Neuman  
Kwame McKenzie  
Matthew McKenzie  
Susan McKernan  
Luseadra McKerracher  
Shane McKie  
Aine McKillop  
Iain McKillop  
Audrey McKinlay  
Jake McKinlay  
Eliot McKinley  
Ross McKinney  
Britt McKinnon  
Elizabeth McKinnon  
John McKinnon  
Lyle McKinnon  
Ross McKitrick  
Thomas McKone  
Andrew McLachlan  
Angus McLachlan  
Craig McLachlan  
James McLachlan  
Michael S. McLachlan  
Robert McLachlan  
Sandra McLachlan  
Jean McLain  
Christine McLaren  
Lindsay McLaren  
Zoë McLaren  
John McLaughlin  
Kelly McLaughlin  
Nicole McLaughlin  
Patricia McLaughlin  
Stephen McLaughlin  
Thomas McLaughlin  
Margaret McLaughlin-Drubin  
Marc McLawhorn  
Mary-Louise McLaws  
Colin McLay  
Carmen McLean  
Robert McLean  
Sara McLean  
A. Thomas McLellan  
Jason McLellan  
Conor McLennan  
Jenny McLennan  
Damian McLeod  
Graem McLeod  
Lynette J. McLeod  
Kenneth McLeroy

Linda McLoon  
Grainne McLoughlin  
Alan McLuckie  
Caleb McMahan  
Melanie McMahan  
Francis McMahan  
Kathryn McMahan  
Kelton McMahan  
Michelle McMahan  
Sean McMahan  
Kimberly McManama O'Brien  
James McManaman  
Concepta McManus  
David McManus  
George McManus  
Lara McManus  
Róisín McManus  
Ross McManus  
Corey McMillan  
Dean McMillan  
Elizabeth McMillan  
Dave McMillen  
Robert McMillen  
Matthew McMillin  
Terry McMorris  
Tara McMorrow  
Caroline McMullan  
Rachel McMullan  
Colleen McMullen  
Mary McMullin  
Troy McMullin  
Paul McMurdie  
David McMurray  
Helene McMurray  
Josephine McMurray  
Kelly McNagny  
Margaret McNairy  
Mark McNally  
James McNamara  
Nancy McNamara  
Patrick McNamara  
Clea McNeely  
Marie McNeely  
Matthew McNeil  
Alison McNeilly  
Tom McNeilly  
Margaret Windy McNerney  
Ruth McNerney  
Erin McNerny  
Janet McNicholl  
Gord McNickle

Archibald McNicol  
Helene McNulty  
Penelope McNulty  
Louise-Anne McNutt  
Catherine McParlin  
Joanne McPeake  
Jamie S. McPhee  
Kevin McPhee  
Megan McPhee  
Misty McPhee  
Shannon McPherron  
Michael McPherson  
Mike McPherson  
Matthew McQueen  
Robert McQueen  
Brad McRae  
Kateri McRae  
Hayden McRobbie  
Neil McRoberts  
Ronald McRoberts  
Brian McSharry  
William McShea  
Daniel McSkimming  
F. McVerry  
Emily McWalter  
David McWethy  
Ketrell McWhorter  
Todd McWhorter  
Daniel McWilliams  
James Meabon  
Julie Meachen  
R. Meacock  
Kieran Meade  
Philip Meade  
Mark Meadowcroft  
Graham Meadows  
Melissa Meadows  
Alan Meagher  
Matthew Meagher  
Rebecca Meagher  
Robert Meagher  
Thomas Meagher  
Judith Meakin  
Lee Meakin  
Peter Meaney  
Sarah Meaney  
Steve Meaney  
Anna Means  
G. Measey  
L. Mech  
Jasmin Mecinovic

Giuseppe Meco  
Blazej Meczekalski  
Nuria Medarde  
Lorilee Medders  
Ray Meddis  
David Medeiros  
Felipe Medeiros  
Jand Venes Medeiros  
Liciane Medeiros  
Renata Medeiros  
Rodrigo Medellin  
Jan Paul Medema  
Benjamin Meder  
Richard Medford  
G. Medhi  
Marco Medici  
Valentina Medici  
Enzo Medico  
Alexandre Medina  
Antonio Medina  
Catalina Medina  
Gisselle Medina  
Milagros Medina  
Nagore Medina  
Rafael Medina  
Raul Medina  
Reinhold Medina  
Antonieta Medina Lara  
Gema Medina-Gomez  
Sara Mednick  
Matus Medo  
Igor Medyna  
Paul Mee  
Jennifer Meece  
Cheryl Meehan  
Sean Meehan  
Thomas Meehan  
Katheryn Meek  
Mariah Meek  
Mark Meekan  
Rick Meeker  
Krai Meemon  
M.L. Meena  
Mukesh Meena  
Sebastiaan Meenderink  
Jochen Meens  
Mariana Meerhoff  
Geert Meermans  
Annegret Meermeier  
Joanne Meers  
Melanie Meersch

Esther Meerwijk  
Ivan Meeus  
Eric Meffre  
Persefoni Megalofonou  
Reitske Meganck  
Salim Megat  
Jean-Louis Mege  
Sara Meger  
Aida Meghraoui-Kheddar  
Alberto Megías  
Itamar Megiddo  
Igor Meglinski  
Matteo Megna  
Francis Mégraud  
Tarek Meguid  
Kenichi Meguro  
Carolina Mehaffy  
Muthamilarasan Mehanathan  
Caroline Meharg  
Alem Mehari  
Céline Mehats  
Roopaei Mehdi  
Sanjay Mehendale  
Kamiya Mehla  
Shawn Mehlenbacher  
Heinz Mehlhorn  
Amjad Mehmood  
Thomas Mehner  
Mohammad Mehrabadi  
Michael Mehring  
Lindsay Mehrkam  
Arne Mehrkens  
Mohammad Mehrmohammadi  
R. Mehrotra  
Rajesh Mehrotra  
Sanjay Mehrotra  
Shikhar Mehrotra  
Aditi Mehta  
Bhairav Mehta  
Daryush Mehta  
Gautam Mehta  
Hemant Mehta  
Nehal Mehta  
Raaj Mehta  
Ranjana Mehta  
Sanjeev Mehta  
Shivan Mehta  
Shwetal Mehta  
Sumi Mehta  
Marc Mehu  
Han-Wei Mei

Jie Mei  
Lingyun Mei  
Michele Mei  
Karin Meibom  
Andreas Meid  
Christian Meier  
Emily Meier  
Jeffery Meier  
Kathryn Meier  
Richard Meier  
Rudolf Meier  
Liliane Meignen  
Carine Meignin  
Franck Meijboom  
Chris J. Meijer  
Harold Meijer  
Inge Meijer  
Ingeborg Meijer  
Karina Meijer  
William Meikle  
Richard Meilan  
Tobias Meilinger  
Serge Meimon  
Christoph Meinel  
Rudi Meir  
Pedro Meirelles  
Susan Meiring  
Christian Meisel  
Richard Meisel  
Robert Meisel  
Zachary Meisel  
Christa Meisinger  
Dominik Meissner  
Eric Meissner  
Markus Meissner  
Wassilios Meissner  
Elissa Meites  
Shannon Mejia  
Asuncion Mejias  
Jorge Mejias  
Kh Mekheimer  
Hayelom Mekonen  
Giuseppe Melacini  
Esther Melamed  
Michal Melamed  
Paul Melancon  
Andrew Melbourne  
Marc Melcher  
Martin Melchers  
Maria Gabriella Melchiorre  
Alessia Melegaro

Jaime Melendez  
Loyda Melendez  
Antonio Melendez-Martinez  
Thomas Melendy  
Carolina Melero  
Pedro Melgar-Lesmes  
Nereida Melguizo-Ruiz  
Hassan Melhem  
Paco Melià  
Bohuslav Melichar  
Heather Melichar  
Lester Melie-Garcia  
Paolo Melillo  
Sharon Melin  
Victoria Meliopoulos  
Claudia Melis  
Giulia Melis  
Roberta Melis  
Sara Melito  
Anette Melk  
Isabelle Melki  
Loren Mell  
Emilia Mellado  
Amit Meller  
Jarek Meller  
Victoria Meller  
George Mellick  
Michelle Mellis  
Alexander Mellmann  
Bruno Mello  
Claudio Mello  
Maria Luiza Mello  
Michelle Mello  
Lisa Mellon  
Ugo Mellone  
Duane Mellor  
Nathan Mellor  
Amine Mellouk  
Andreas Melmer  
Ana Melo  
Eduardo Melo  
Felipe Melo  
Gisely Melo  
Miguel Melo  
Ilaria Meloni  
Sandro Meloni  
Carlo Meloro  
Henry Melosh  
Cindy Melotte  
Wayne Melrose  
Alida Melse-Boonstra

Keegan Melstrom  
Douglas Melton  
Phillip Melton  
Andrea Meltzer  
Sara J. Meltzer  
Geoffrey Meltzner  
Andrew Meltzoff  
Massimo Melucci  
Espen Melum  
Shiri Melumad  
Stephen Melville  
Ryan Melvin  
Amir-Hossein Memari  
Ali Memarian  
Alireza Memarian  
Erdogan Memili  
Esra Memili  
Solomon Memirie  
Haris Memišević  
Muhammed Memon  
Hongsheng Men  
Yujie Men  
Ciro Menale  
Didier Menard  
Armelle Ménard  
Idan Menashe  
Rima Menassa  
Antonella Mencacci  
Jörg Menche  
Chang Men-Chi  
Jose M Menchon  
Arianna Menciassi  
Jerry Mendel  
Lorne Mendell  
Mark Mendell  
Robert Mendelsohn  
Bryan Mendelson  
Alexander Mendenhall  
Fausto Mendes  
Marta V. Mendes  
Renato Mendes  
Tiago Mendes  
Ian Mendez  
Pedro Mendez  
Ramiro Méndez  
Carmen-Dora Mendez-Hernandez  
Rosália Mendez-Otero  
Cristina Mendez-Vidal  
Alberto Mendez-Villanueva  
Amy Mendham  
Christopher Mendias

Carlos Mendivil  
Franklin Mendivil  
Murlidhar Mendki  
Michael Mendl  
Luca Mendler  
Janine Mendola  
David Mendonça  
Marcelo Mendonça  
David Mendoza-Cozatl  
Rodolfo Mendoza-Denton  
Bernardo Mendoza-Santoyo  
Naranpurev Mendsaikhan  
Maimuna Mendy  
Vincent Mendy  
Rachel Menegaz  
Michela Menegon  
Margarita Menéndez  
Carlos Menendez-Castro  
Ersilia Menesini  
Jerome Menet  
Charlene Menezes  
Jorge Menezes  
Ritesh Menezes  
Telmo Menezes  
Rafael Menezes-Reis  
Daniel Menezes-Souza  
Fan-Gang Meng  
Fanyin Meng  
Hongdao Meng  
Huicui Meng  
Jianjun Meng  
Jin Meng  
Jinhong Meng  
Kangpei Meng  
Kyle Meng  
Le Meng  
Lei Meng  
Linghui Meng  
Maxwell Meng  
Pei-Jie Meng  
Qinglai Meng  
Ran Meng  
Shu Meng  
Weihua Meng  
Xiangbing Meng  
Yan Meng  
Yuan Meng  
Yuan Xiang Meng  
Zheng Meng  
Zhipeng Meng  
Zhiqiang Meng

Zhuoxian Meng  
Cristiane Mengatto  
Bruce Menge  
Til Menge  
Jonas Mengel-From  
Catherine Mengelle  
Zelalem Mengesha  
Elena Mengheri  
Dominique Mengin-Lecreux  
Maria Cecilia Mengoli  
Alessio Mengoni  
Manuela Mengozzi  
Ole Mengshoel  
Lourdes Mengual  
Francesco Menichetti  
Lorenzo Menichetti  
Donald Menick  
Mario Menk  
Ricarda Menke  
Franck Mennechet  
Brian Mennecke  
Steven Mennerick  
Balaraj Menon  
Deepthy Menon  
Madhav Menon  
Pradeep Menon  
Purnima Menon  
Ram Menon  
Ramkumar Menon  
Saras Menon  
Swapna Menon  
Vijay Menon  
Cesar Menor-Salvan  
Fiona Mensah  
Robert Mensah  
Allen Mensinger  
Gregorio Mentaberre  
Janet C. Mentas  
Rolf Mentlein  
Giovanni Mento  
Alexander Mentzer  
Steven Mentzer  
Elisabeth Menu  
Arnaud Menuet  
Karen Menuz  
Myles Menz  
Barbara Menzaghi  
Charles Menzel  
Stephan Menzel  
Johannes Menzel-Severing  
Robert Menzies

Sultan Meo  
Giovanni Meola  
Flavia Meotti  
Zul Merali  
Serena Meraviglia  
Nofel Merbahi  
Sebastiano Mercadante  
Jesus Mercado  
Diego J. Mercanti  
Annette Mercer  
Paul Mercer  
Stewart Mercer  
Tom Mercer  
Vicki Mercer  
Miguel Merchan  
Aziz Merchant  
Nathan Merchant  
Annie Mercier  
Jean-Christophe Mercier  
Joffre Mercier  
Manuel Mercier  
Norbert Mercier  
Romain Mercier  
Anais Merckx  
Genevive Meredith  
Robert Meredith  
Clement Meredith E  
Matthew Meredith-Williams  
Pierre Merel  
Ivan Merelli  
J.J. Merelo  
Daniel Merenstein  
Daniel M. Merfeld  
Irmgard Merfort  
Ján Merganic  
Stefan Mergler  
Thomas Mergner  
Stephanie Merhar  
Joe Merheb  
Seppo Meri  
Ashley Merianos  
Mathias Mericksay  
Daniele Merico  
Karine Merienne  
Alberto Meriggi  
Juha Merilä  
Tania Merinas-Amo  
Diana Merino  
Janie Merkel  
Mathias Merker  
Rainer Merkl

Rebecca Merkley  
Arben Merkoçi  
Daphne Merkus  
Carsten Merkwirth  
Maarten Merkx  
Roberto Merletti  
Manuela Merli  
Didier Merlin  
Juan Merlo  
Elodie Merlot  
George Mermelekas  
D. Merrell  
Claire Merrifield  
Jacqueline Merrill  
Michael Merrill  
Rebecca Merrill  
Scott Merrill  
Amy Merrill-Brugger  
Tony Merriman  
Allen Merritt  
Edward Merritt  
Russell Merritt  
Thomas Merritt  
Lisa Merry  
Sally Merry  
W. David Merryman  
Laura Merson  
Samuel Merson  
Gaetan Mertens  
Frederic Mery  
Erin Merz  
Julian Merz  
Maximilian Merz  
Hiltrud Merzenich  
Ruben Mesa  
Annamaria Mesaros  
Omar Mesarwi  
Tiziana Meschi  
Elena Meseguer  
Marcos Meseguer  
Pablo Mesejo  
David Mesher  
Dar Meshi  
Mena Meshiha  
Michael Mesler  
Thibault Mesplede  
Raquel Mesquita-Ferrari  
Evangelos Messaris  
Arnaud Messé  
Anne Messer  
Regina Messer

William Messer  
Geraldyn Messerlian  
Antoine Messiah  
G. Messina  
Joseph Messina  
Albee Messing  
Daniel Messinger  
Ioannis Messinis  
Vanessa Messmer  
Andrea Messori  
Karen Mestan  
Jiri Mestecky  
Daniel Mestre  
Tiago Mestre  
Nadine Mestre-Francès  
C Mestres  
Heather Metcalf  
Kelly Metcalf Pate  
Andrew Metcalfe  
D. Metcalfe  
Jessica Metcalfe  
Richard Metcalfe  
Mark Metersky  
Andrew Metha  
Pat Metharom  
Spyridon Methenitis  
Richard Methot  
Shona Methven  
Mathieu Métifiot  
Matteo Metruccio  
Markus Metsälä  
Brian Metscher  
George Metsios  
Amel Mettouchi  
Jonathan Metts  
Tricia Metts  
Ramgopal Mettu  
Christine Metz  
Silke Metzethin  
Eric Metzen  
Michael Metzen  
David Metzger  
Florian Metzger  
Gregory Metzger  
Jean-Paul Metzger  
Jochen Metzger  
Wolfgang Metzger  
Dirk Metzler  
Rebecca Metzler  
B.U. Metzler-Zebeli  
Walter Metzner

Sascha Meudt  
Yvette Meuleman  
Ingrid Meulenbelt  
Daniele Meunier  
David Meunier  
Jean Christophe Meunier  
Jean-Dominique Meunier  
Joel Meunier  
LaVonne Meunier  
Patrice Meunier  
François Meurens  
William Meurer  
Jukka Meurman  
Ralph Meuwissen  
Ludovic Mevel  
Dik Mevius  
Louise Mewton  
Nathan Mewton  
David Meya  
Patrick Meybohm  
Bernd Meyburg  
Anne Meyer  
Christoph Meyer  
David Meyer  
Dawn Meyer  
Diogo Meyer  
Evelyne Meyer  
Everett Meyer  
Francois Meyer  
Gretchen Meyer  
Haakon Meyer  
Jacob Meyer  
Jaimie Meyer  
Jeffrey Meyer  
Joel Meyer  
Julie Meyer  
K. Meyer  
Kate Meyer  
Meghan Meyer  
Nicole Meyer  
Richard Meyer  
Ron Meyer  
Sara Meyer  
Thomas Meyer  
Tim Meyer  
Ulrich Meyer  
Wallace Meyer III  
Gerd Meyer zu Horste  
Almut Meyer-Bahlburg  
José Meyer-Fernandes  
Andreas Meyerhans

Hauke Meyerhoff  
Ulf Meyer-Hoffert  
David Meyerholz  
Gesine Meyer-Rath  
Victor-Benno Meyer-Rochow  
Amos Meyers  
Arthur Meyers  
Gregor Meyers  
James Meyers  
Jason Meyers  
Sandra Meyers  
Tammy Meyers  
Catherine Meyer-Schwesinger  
Delphine Meynard  
David Meyre  
Rafael Meza  
Takahiro Mezaki  
Leonardo Meza-Zepeda  
Edward Mezones-Holguin  
Briana Mezuk  
Teresa Mezza  
Sergio Mezzano  
Maria Lina Mezzatesta  
Maura Mezzetti  
Nyaradzo Mgodli  
Leithen M'Gonigle  
Nizar Mhaidat  
Oussama Mhamdi  
Oussama M'Hamdi  
Gu Mi  
Guohua Mi  
Jun Mi  
Shengli Mi  
Xiangcheng Mi  
María Miana  
Joseph Miano  
Maria Giuseppina Miano  
Silvia Miano  
Chiyuan Miao  
Junying Miao  
Long Miao  
Qing Miao  
Qiucheng Miao  
Sheng Miao  
Shida Miao  
Weibing Miao  
Wen Miao  
Xuexia Miao  
Yi-Liang Miao  
Zhongrong Miao  
George Mias

Claude Miaud  
Tomasz Miazgowski  
Alfredo Miccheli  
Luca Micci  
Laura Miccoli  
Antonio Miceli  
Cristina Miceli  
Francesco Miceli  
Rosalba Miceli  
Corinne Miceli-Richard  
Davis Michael  
Drew Michael  
W. Michael  
Shalom Michaeli  
Jacob Michaelson  
Jakob Michaëlsson  
Peter Michaely  
Pavlos Michailopoulos  
Johannes Michalak  
Marcin Michalak  
Marek Michalak  
S.J. Michalak  
Tomasz Michalak  
George Michalopoulos  
Lynn Michalopoulos  
Christoph W. Michalski  
Dominik Michalski  
Fernanda Michalski  
Nicolas Michalski  
Stefan Michalski  
Dominique Michaud  
J.P. Michaud  
Chloé Michaudel  
Johan Michaux  
Olivier Micheau  
Andrew Michel  
Brady Michel  
Clotaire Michel  
Maximilian Michel  
Sarah Michel  
Stephan Michel  
Helen Michelakakis  
Frank Michelangeli  
Daniel Michele  
Manuele Michelessi  
Thomas Michelet  
Cristian Micheletti  
Vania Micheletti  
Fabienne Micheli  
Giorgia Michelini  
Théo Michelot

Aaron Michels  
Jan Michels  
Nathalie Michels  
Anders Michelsen  
Brigitte Michelsen  
N. Michelutti  
Carine Michiels  
Joris Michiels  
Peter Michielsen  
Toshimi Michigami  
Matsushita Michinari  
Bozena Michniak-Kohn  
Frederic Michon  
François Michonneau  
Franziska Michor  
Emilia Michou  
Dejan Micic  
Alan Mickelson  
James Mickelson  
Beata Mickiewicz  
James Mickle  
Marla Mickleborough  
Joan C. Mico  
Kelli Micocci  
V. Micol  
Silvia Middei  
Mathias Middelboe  
Esther Middelkoop  
Candace Middlebrooks  
Frank Middleton  
James Middleton  
Mark Middleton  
Edoardo Midena  
Havard Midgard  
Meghan Midgley  
Miriam Midoun  
Anne Midwinter  
Thomas Miedaner  
Harald Miedema  
Isabelle Miederer  
Zofia Miedzybrodzka  
Wolfram Miekisch  
Marco Mielcarek  
Michal Mielcarek  
Luca Miele  
Mara Miele  
H. Mielke  
Daniela Mier  
Andreas Mierau  
Claudia Mierke  
Gabry Mies

Nova Mieszkowska  
Alexander Miething  
Elizabeth Mietlicki-Baase  
Maija Miettinen  
Markus Miettinen  
Muhammad Miftahussurur  
Egidia Miftode  
Karen Miga  
Michael Miga  
Americo Migliaccio  
Anna Rita Migliaccio  
Giovanni Migliaccio  
Federica Migliardo  
Maria Pia Miglietta  
Luciana Migliore  
Marcello Migliore  
Marco Donald Migliore  
Diana Miglioretti  
Giovanni Battista Migliori  
Adriana Migliorini  
Christine Migliorini  
Paola Migliorini  
Paolo Mignatti  
Eve Miguel  
Joaquin Miguez  
Rada Mihalcea  
Joseph Mihaljevic  
Jozsef Mihaly  
Takahiro Mihara  
S.J. Mihic  
Sabine Mihm  
Nagasawa Miho  
Mircea Radu Mihu  
Fumika Mi-ichi  
Peierdun Mijiti  
Paizy Mikael  
Aase Mikalsen  
K Mikami  
Katalin Mikecz  
Emad Mikhail  
Dimitri Mikhailidis  
Theresa Mikhailov  
Alexandra Mikhailova  
Atsuya Miki  
Toshio Miki  
Aleksandar Mikic  
Jason Mikiel-Hunter  
Irene Mikkelsen  
Jørn Mikkelsen  
Tuija Mikkola  
Mozes Miklos

Sebastian Mikolajczak  
Rafael Mikolajczyk  
Katsuhiko Mikoshiba  
Christian Mikutta  
Branko Miladinovic  
Lucimar Milagres  
Fermin Milagro  
Alberto Milan  
Valentina Milana  
Marco Milanese  
Liliana Milani  
Narges Milani  
Giuseppe Milano  
Marciane Milanski  
Béatrice Milard  
Marco Milazzo  
Paolo Milazzo  
Michael Mildner  
Dan Milea  
Vladimir Milenkovic  
Anna Miles  
Helen Miles  
Michael Miles  
Lorin Milescu  
Maria Elena Miletto Petrazzini  
Dianna Milewicz  
Catarina Milheiriço  
Andreas Miliadis-Argeitis  
Fabio Milioni  
Ingrid Miljeteig  
Nadica Miljkovic  
Goran Miljus  
José Geraldo Mill  
Javier Millan  
Jose Millan  
Ana Millanes  
Anthony Millar  
Cameron Millar  
David P. Millar  
Heather Millar  
Jocelyn Millar  
Russell Millar  
Charles Millard  
James Millard  
Peter Millard  
Laura Millares  
Douglas Millay  
Amy Millen  
Dominic Millenaar  
Frank Millenaar  
Allison Miller

Amy Miller  
Andrew Miller  
Benjamin Miller  
Bill Miller  
Brandon Miller  
Brenda Miller  
Bruce Miller  
Charles Miller  
Craig Miller  
D. Shane Miller  
Daniel Miller  
David Miller  
Dennis Miller  
Edgar Miller  
Elizabeth Miller  
Freeman Miller  
Gabrielle F. Miller  
Galen Miller  
George Miller  
Holly Miller  
Ingrid Miller  
Jason Miller  
Jeffrey Miller  
Jennifer Miller  
Jeremy Miller  
John Miller  
Jonathan Miller  
Jordan Miller  
Joshua Miller  
Justin Miller  
Kai Miller  
Karla Miller  
Kenneth Miller  
Kyle Miller  
Laura Miller  
Lawrence Miller  
Lisa Miller  
Luke Miller  
Lyndsey Miller  
M. Miller  
Marcia Miller  
Margaret Miller  
Mark Miller  
Michael Miller  
Michele Miller  
Patti Miller  
Rachel Miller  
Russell Miller  
Ryan Miller  
Seth Miller  
Shelley Miller

Steve Miller  
Timothy Miller  
Tom Miller  
W. Miller  
Wolfgang Miller  
Grégoire Millet  
Juan-Pablo Millet  
Kobe Millet  
Oscar Millet  
Jonathan Millett  
Stefania Millevoi  
Sophia Millington-Ward  
Alexander Millman  
Alexander Millner  
Bradford Mills  
Candice Mills  
Claudia Mills  
Daniel Mills  
David Mills  
Edward Mills  
Kingston Mills  
Joshua Millstein  
Jason Millward  
Elizabeth Milne  
Adrienne Milner  
Joshua Milner  
Matthew Milner  
Stasa Milojevic  
Staša Milojevic  
Marco Milone  
Nebojsa Milosevic  
Marie-Helene Milot  
Leonard Milstone  
Hendrik Milting  
Jacqueline Milton  
Sarah Milton  
Ada Miltz  
Barbara Milutinovic  
R Mimoto  
Meryl Mims  
H. Mimura  
Byoung-Kyong Min  
Fan Min  
Lei Min  
Myo Min  
Yoshio Minabe  
Tomonori Minagawa  
Manabu Minami  
Shujiro Minami  
Tetsuto Minami  
Susumu Minamisawa

Toshifumi Minamoto  
Budiman Minasny  
Elaine Minatel  
Laura Mincarelli  
Pierpaolo Mincarone  
Todd Minchinton  
Thomas Minckley  
John Minda  
Mark Minden  
Joseph Minei  
Alessandra Minello  
Chieko Mineo  
Chundung Miner  
Jeffrey Miner  
Melissa Miner  
A. Minervini  
Fabio Minervini  
Massimo Minervini  
Emmanuel Minet  
Geoffrey Minett  
Karsten Minette  
Carlo Minetti  
Liu Ming  
Long Chiau Ming  
Shi Ming Luo  
Claro Mingala  
John Mingers  
Matteo Minghetti  
Marco Minghini  
Jesus Mingorance  
Lidia Minguez-Alarcon  
Pham Minh  
Quang Bui Minh  
Darren Minier  
Anne Marie Minihane  
Vladimir Minin  
F. Minion  
Jessica Mink  
Peter Minko  
Cho Minkyong  
Liaan Minnie  
Helen Minnis  
Mari Mino  
Yoshihisa Mino  
Subhash Minocha  
Laëtitia Minodier  
Mari Mino-Kenudson  
Parviz Minoo  
Daniel Minor  
Thomas Minor  
Samuel Minot

Giorgio Minotti  
Lisa Minter  
Coilin Minto  
Jonathan Minton  
Akiva Mintz  
Toby Mintz  
Filippo Minutolo  
Roberto Minutolo  
Lisa Miorin  
Eneida Mioshi  
Paolo Miotto  
Sylvie Miquel  
Dale Miquelle  
Johanna Miquet  
Joan Mir  
Pablo Mir  
Reyazul Rouf Mir  
Snober Mir  
Giovanni Mirabella  
Lucia Mirabella  
Massimiliano Mirabella  
Clelia Miracco  
Maria Miragaia  
Daniel Miralles  
Angelica Miranda  
Carlos Miranda  
Daniel Miranda  
Kildare Miranda  
Marco Miranda  
Rafael Miranda  
Rajesh Miranda  
Susan Miranda  
Juan Miranda Olivares  
Gustavo Miranda-Carboni  
Mohammad Miransari  
Cindy Miranti  
Gabriel Mircescu  
Austin Mircheff  
Clotilde Mircher  
B. Mirdha  
Chad Mire  
E. Mireles-Cabodevila  
Andrew Mirelman  
Brenda Mirembe  
Gladys Mirey  
Mohammad Miri  
Luca Mirimin  
Mario Mirisola  
Gianluca Mirizzi  
Alemnesh Mirkuzie  
Daniel Mirman

Parvin Mirmiran  
Marco Miroddi  
Richard Miron  
Veronique Miron  
Talya Miron-Shatz  
Jon Mirsalis  
Alireza Mirshahi  
Veriko Mirtskhulava  
Sabiruddin Mirza  
Shama Mirza  
Farah Mirzaagha  
H. Mirzabozorg  
Ali Mirzazadeh  
Takumi Misaka  
Masaya Misaki  
Kiyoshi Misawa  
Harald Mischak  
Paul Mischel  
Lisa Mische-Lawson  
Naobumi Mise  
Laurent Misery  
Brian Mishara  
Kei-ichiro Mishiba  
Kenji Mishima  
Yuji Mishina  
Abhishek Mishra  
Asht Mishra  
Avinash Mishra  
Biswajit Mishra  
Debasish Mishra  
Geetanjali Mishra  
Lopa Mishra  
Nilamadhab Mishra  
Nishant Mishra  
Nitish Mishra  
Paras Mishra  
Parul Mishra  
Phool Mishra  
Rakesh Mishra  
Sachidananda Mishra  
Shailendra Mishra  
Sharmistha Mishra  
Vikas Mishra  
Vimal Mishra  
Blazej Misiak  
Andrzej Miskiewicz  
Lino Misoguti  
Anoop Misra  
Ashish Misra  
Diva Kant Misra  
Jyoti Misra

Madhusmita Misra  
Prashant Misra  
Smita Misra  
Manuela Missana  
Benjamin Missbach  
Markus Missler  
Charlotte Mistretta  
Chuck Mistretta  
Falguni Mistry  
Jayalaxshmi Mistry  
Toshihiro Mita  
Delphine Mitanchez  
Yoshihide Mitani  
Nilay Mitash  
William Mitch  
Aaron Mitchell  
Anne Mitchell  
Brett Mitchell  
Cameron Mitchell  
Cassie Mitchell  
David Mitchell  
Elizabeth Mitchell  
Gregory Mitchell  
Hugh Mitchell  
John Mitchell  
Julie Mitchell  
Pamela Mitchell  
Paul Mitchell  
Peter Mitchell  
Piers Mitchell  
Rebecca Mitchell  
Robert J. Mitchell  
Suzanne Mitchell  
Tanecia Mitchell  
William Mitchell  
Ayoub Mitha  
Steven Mithen  
Gilles Mithieux  
Axel Mithöfer  
Carole Mitnick  
Adinpunya Mitra  
Anirban Mitra  
Aniruddha Mitra  
Dipak Mitra  
Monika Mitra  
Pralay Mitra  
Sophie Mitra  
Sunanda Mitra  
Nico Mitro  
John Mitrofanis  
Alex Mitropoulos

Ioannis Mitroulis  
Ragai Mitry  
Georgios Mitsis  
Kohji Mitsubayashi  
Nobutaka Mitsuda  
Akira Mitsuhashi  
Takahiko Mitsui  
Shigeki Mitsunaga  
Ashwani Mittal  
Jeetain Mittal  
Manish Mittal  
Payal Mittal  
Vijay Mittal  
Vinay Mittal  
Gary Mittelbach  
Maurice Mittelmark  
Birgit Mitter  
Sayak Mitter  
Holger Mitterer  
Annat Mitterhofer  
Philipp Mitteroecker  
Jeffrey Mitton  
Daisuke Miura  
Kazutoyo Miura  
Nobuhiko Miura  
Shin-ichiro Miura  
Takeshi Miura  
Tetsuji Miura  
Yuri Miura  
Hiroto Miwa  
Hiroyuki Miwa  
Masaki Miya  
Masaru Miyagi  
Yohei Miyagi  
Makoto Miyagishi  
Yoshihiro Miyahara  
Tempei Miyaji  
Fabio Miyajima  
Megumi Miyakawa  
Sanae Miyake  
Masatoshi Miyakoshi  
Yuichiro Miyamatsu  
Shigeki Miyamoto  
Takeshi Miyamoto  
Yumiko Miyamoto  
Akio Miyao  
Makoto Miyara  
Akinori Miyashita  
Jun Miyata  
Kanjiro Miyata  
Masaaki Miyata

Shingo Miyata  
Takaki Miyata  
Makoto Miyazaki  
Mariko Miyazaki  
Shinya Miyazaki  
Tadaaki Miyazaki  
Tetsuro Miyazaki  
Keisuke Miyazawa  
Takayuki Miyazawa  
Eiji Miyoshi  
Norio Miyoshi  
Noriyuki Miyoshi  
Takemasa Miyoshi  
Tomohiro Miyoshi  
Toru Miyoshi  
Anja Mizdrak  
Atsushi Mizoguchi  
Tetsuya Mizoue  
Takashi Mizowaki  
Yaffa Mizrachi Nebenzahl  
Boaz Mizrahi  
Mineyuki Mizuguchi  
Hiroki Mizukami  
Yoichi Mizukami  
Kenji Mizumoto  
Kazue Mizumura  
Makoto Mizunami  
Atsushi Mizuno  
Cassia Mizuno  
Hideaki Mizuno  
Hiroshi Mizuno  
Masaki Mizuno  
Masashi Mizuno  
Takuya Mizuno  
Tooru Mizuno  
Shusei Mizushima  
Tsunekazu Mizushima  
Akiko Mizuta  
Sayaka Mizutani  
Giovanni Mizzi  
Amosy M'Koma  
Premysl Mladenka  
David Mladenoff  
Ivona Mladineo  
Kristin Mmari  
Lucas Mmonwa  
Volodymyr Mnih  
Ji-Hun Mo  
Jinhan Mo  
Tor Atle Mo  
Xiulei Mo

Yin-Yuan Mo  
Marocolo Moacir  
William Moar  
Helen Susannah Moat  
Rex Moats  
Massieh Moayed  
Danesh Moazed  
Ralph Mobbs  
Mia Moberg  
Aaron Moberly  
Nicholas Moberly  
Mauro Mobilia  
William Mobley  
Izabela Mocaiber  
Stefano Mocali  
Francesco Moccia  
Simone Mocellin  
Holger Moch  
Yoshiyuki Mochida  
Manabu Mochizuki  
Naoki Mochizuki  
Daria Mochly-Rosen  
Daniel Mochon  
Jason Mock  
Kenrick Mock  
Amirhossein Modabbernia  
Subhasish Modak Chowdhury  
Dalit Modan-Moses  
Yahya Modarres-Sadeghi  
Charin Modchang  
Pietro Modesti  
Pietro Amedeo Modesti  
Sean Modesto  
Alessandra Modi  
Gopesh Modi  
Shiva Kumar Modi  
Surbhi Modi  
Jaime Modiano  
Maria Vittoria Modica  
Helmout Modjtahedi  
Ute Modlich  
Luzia Modolo  
Børge Moe  
Luke Moe  
Rikke H. Moe  
Stein R. Moe  
Marius Moebius  
Carolyn Moehling  
Jeff Moehlis  
Wenke Moehring  
Seyedsina Moeinzadeh

Ralf Moeller  
Tobias Moellers  
Ron Moen  
Thomas Moench  
Michel Moenner  
Marie-Francine Moens  
Yves Moens  
Annelies Moerman  
Cyril Moers  
Caroline Moeser  
Joachim Moessner  
Siver Moestue  
John Moffat  
Aldo Moggio  
Minoo Moghaddam  
Shaida Moghaddassi  
Akshata Moghe  
Gaurav Moghe  
Paolo Moghetti  
Alex Mogilner  
Daniel Mograbi  
David Mogul  
Harriette Mogul  
Magda Mohamad  
Amin Mohamadi  
Feroze Mohamed  
Islam Mohamed  
Junaith Mohamed  
Moemen A. Mohamed  
Muhanad Mohamed  
Salahtoumi Mohamed  
Vidya Mohamed Ali  
Firdaus Mohamed Hoesein  
Khalid Mohamedali  
Mahjoub Mohamed-Sofiane  
Asif Mohammad  
Haroon Mohammad  
Saif Mohammad  
Ali Mohammadi  
Ehsan Mohammadi  
Fakhroddin Mohammadi  
Hadi Mohammadi  
Moosa Mohammadi  
Rahim Mohammadi  
Altaf Mohammed  
Amr Mohammed  
Atif Mohammed  
Emad A. Mohammed  
Hisham Mohammed  
Khaled Mohammed  
Amita Mohan

Diwakar Mohan  
John Mohan  
Mahesh Mohan  
Pavitra Mohan  
Ram Mohan  
Subburaman Mohan  
Suyash Mohan  
V. Mohan  
Viswanathan Mohan  
Manoj Mohanan  
Harini Mohanram  
Tapan Mohanta  
Ashok Mohanty  
Debasisa Mohanty  
Keshar Mohanty  
Pankaj Mohanty  
Sanghamitra Mohanty  
Devi Prasad Mohapatra  
Saroj Mohapatra  
Fady Mohareb  
Rosminah Mohd  
Mohd Ridzuan Mohd Abd Razak  
Mohd Lila Mohd Azmi  
Fauziah Mohd Jaafar  
Vindhya Mohindra  
Muhammad Mohiuddin  
Emily Mohl  
Martha Mohler  
Maura Mohler  
Stephan Möhlhenrich  
Angelika Mohn  
Trine Moholdt  
Vijayanand Moholkar  
Alicia Mohr  
Christine Mohr  
Nicholas Mohr  
Yasuhiko Mohri  
Masuda Mohsena  
Vahid Mohsenin  
Muhammad Raheel Mohyuddin  
Amir Moin  
Hervé Moine  
Marie-Pierre Moisan  
Pia Moisaner  
Alexander Moise  
Vera Moiseenkova-Bell  
Genndiy Moiseyev  
Steven Moisyadi  
Luis Moita  
Ethan Moitra  
Subhabrata Moitra

Lorenzo Moja  
Chris Mojock  
Sanyu Mojola  
Chi Chiu Mok  
Chris Mok  
Mo Yin Mok  
Peggy Mok  
Pooneh Mokarram  
Parisa Mokhtari  
Lidwine Mokkink  
Mikael Mokkaonen  
Andreas Mokros  
Lauren Mokry  
Ben Mol  
Peter Mol  
Monica Molano  
Kåre Mølbak  
Simone Mölbert  
Samat Moldakarimov  
Marthe Moldes  
Mihai Moldovan  
Lucy Moleleki  
Dylan Molenaar  
Marc Molendijk  
Marcelo Molento  
Marcos Moleon  
Yasmina Molero  
Alessio Molfino  
Vera Moliadze  
Marianne Molin  
Mikael Molin  
Anthony Molina  
Frank Molina  
Gustavo Molina  
Jean-Michel Molina  
Rafael Molina  
Samuel Molina  
Rafael Molina Soriano  
Alvaro Molina-Cruz  
Zinnia Judith Molina-Garza  
Mariam M Molina-Molina  
Eugenio Molina-Navarro  
Filippo Molinari  
Marco Molinari  
Maurizio Molinari  
N. Molinari  
Sergio Molinari  
Antonio Molinaro  
Sabrina Molinaro  
Ivan Molineris  
Ian Molineux

Blanca Molins  
Mark Molitch  
Gert Moll  
Heidrun Moll  
Isabella Moll  
Remington Moll  
Roland Moll  
Ashagre Molla  
Gianluca Molla  
Nathan Mollberg  
Catherine Molleareau-Manauté  
Freerk Molleman  
Lucas Molleman  
Brit Mollenhauer  
Hans-Jurgen Moller  
Luciana Moller  
T.P. Moller  
Luciana Möller  
Michael C. Möller  
Sören Möller  
Anders Møller  
Niels Møller  
Per Møller  
Marta Mollerach  
Geraldine Mollet  
Mike Mollet  
Luca Mollica  
Marcelo Mollinari  
Ernesto Mollo  
John Mollon  
Justin Molloy  
Katharine Molloy  
Barbara Molnar  
Zoltan Molnar  
Zsolt Molnar  
István Molnár  
Nicolas Molnarfi  
Fergal Moloney  
Nicholas Moloney  
David Molony  
Lewis Molot  
Elena Moltchanova  
Anthony Molteno  
Maria Molto  
María Moltó  
Attila Molvarec  
Philip Molyneaux  
Elizibeth Molyneux  
Michelle Momany  
Navneet Momi  
Paolo Momigliano

Anne Mette Momsen  
Cristián Monaco  
James Monaghan  
Pat Monaghan  
Sean Monaghan  
Matteo Monami  
Umrao Monani  
Jean Claude Monboisse  
Darren Monckton  
Gemma Moncunill  
Abdul Mondal  
Debasis Mondal  
Dinesh Mondal  
Kunal Mondal  
Pinki Mondal  
Mario Mondelli  
Stefania Mondello  
Guillaume Mondesert  
Stanislas Mondot  
Bernardo Monechi  
Ryan Monello  
Rafael Moner  
Nigel Mongan  
Céline Mongaret Kossmann  
Otto Monge  
Susana Monge  
Luc Mongeau  
Philippe Mongeon  
Gianluigi Mongillo  
Marco Mongillo  
Skorn Mongkolsuk  
Morgana Mongraw-Chaffin  
Cojocarú Monica  
Francisco Moniche  
Tom Monie  
Garg Monika  
Mohammed Moniruzzaman  
Paul Monis  
Anna Moniuszko  
Norihito Moniwa  
Lucas Monje  
M. Monje  
Paula Monje  
Akira Monji  
David Monk  
Ian Monk  
Jennifer Monk  
Juha Mönkäre  
Fanny Monneaux  
Tony Monnet  
Catherine Monnier

Patricia Monnier  
Marc Monot  
Anna Monreale  
Andrew Monroe  
Courtney Monroe  
Antonio Monroy-Noyola  
Maria Monsalve  
Stephen Monsell  
José Monserrat  
Bruce Monson  
Ken Monson  
Jean-Jacques Monsuez  
Michael A. Mont  
Dirk Montag  
Cristina Montagna  
Matteo Montagna  
Paul Montagna  
Virginie Montagne  
Alexandra Montagner  
Arnau Montagud  
Carl Montague  
Karli Montague  
Xavier Montagutelli  
Esmelda Montalban  
Carlos Montalvo  
Giovanna Montana  
Shaena Montanari  
Giuseppe Montanaro  
Joan Montaner  
Yuri Montanholi  
Jean-Marc Montanier  
Aldo J. Montano-Loza  
Didier Montarras  
Hamidreza Montazeri Aliabadi  
Andrew Monte  
Celia Monteagudo  
Jane Montealegre  
Andréa Monte-Alto-Costa  
Martin Montecino  
Alvaro Monteiro  
Fernando Monteiro  
Gisele Monteiro  
Lara Monteiro  
Mervyn Monteiro  
Renato Monteiro  
Ricardo Monteiro  
Wuelton Monteiro  
Juliana Monteiro de Almeida Rocha  
Glaucia Monteiro de Castro  
R.S. Monteiro-Junior  
Giovanni Monteleone

Denise Montell  
Maurizio Montella  
Cinzia Montemurro  
Filippo Montemurro  
Daniel Montero  
Carolina Montero-Lopez  
Camilo Montes  
Fernando Montes  
Catharine Montgomery  
Elizabeth Montgomery  
Janet Montgomery  
Jim Montgomery  
John Montgomery  
McKale Montgomery  
Ruth Montgomery  
Stephen Montgomery  
Eugenio Monti  
Gustavo Monti  
Lucia Monti  
Luca Monticelli  
Marco Monticone  
Alonso Montiel-Luque  
Robson Q Montiero  
Giovanni Montini  
Guillermina Montoliu  
Raquel Montorio  
Estrella Montoya  
Jared Montoya  
Julio Montoya  
Quimi Montoya  
Ben Montpetit  
Marina Montresor  
Silvina Montrul  
Marta Montserrat  
Burrell Montz  
Michael Monuteaux  
A.K.M. Monwarul Islam  
Alice Monzani  
Satoru Monzen  
Anand Moodley  
Clinton Moodley  
Jagidesa Moodley  
Jayajothi Moodley  
Riya Moodley  
James Moody  
M. Moody  
Frits Mooi  
Shona Mookerjee  
Neeloffer Mookherjee  
Ellen Moomaw  
Anne Moon

Chan-Hong Moon  
Hyo-Bang Moon  
Jae Hoon Moon  
Min Kyong Moon  
Minho Moon  
Richard Moon  
Seok Jun Moon  
Seongwuk Moon  
Sung-Sil Moon  
Yong-Hwan Moon  
Patrick Moonan  
Jan-Renier Moonen  
Justine Moonen  
Andrew Mooney  
David Mooney  
Edward Mooney  
Mark Mooney  
Robert Mooney  
Scott Mooney  
Skyler Mooney  
T. Mooney  
Aimee Moore  
Andrew Moore  
Ann Moore  
Brian Moore  
Catrin Moore  
Daniel Moore  
Francis Moore  
Frederick Moore  
Holly Moore  
James Moore  
Jeff Moore  
Jennifer Moore  
John Moore  
Joseph Moore  
Julie Moore  
Katrina Moore  
Lee Moore  
Martin Moore  
Nathan Moore  
Penny Moore  
Richard Moore  
Robert Moore  
Roger Moore  
Sean Moore  
Suzanne Moore  
Thomas Moore  
Elisabeth Moores  
Priya Moorjani  
Anthony Moorman  
J. Moorman

Thomas Moorman  
Eddy Moors  
Sita Moorthi  
Mohammed Moosa  
Mahmood Moosazadeh  
Kerli Mooses  
Eric Mooshagian  
Henning Mootz  
Iain Moppett  
Orna Mor  
Delio Mora  
Jaume Mora  
Francesco Morabito  
Santo Morabito  
Ricardo Mora-Cartin  
Ghobad Moradi  
Maziar Moradi-Lakeh  
José Moraes  
Theo Moraes  
Thyago Moraes  
Anderson Moraes de Oliveira  
Elisangela Morais  
Joao Morais  
Albert Morales  
Aleman Morales  
Alfredo J. Morales  
Angie Morales  
Antonio Morales  
Celina Morales  
Hernan Morales  
Javier Morales  
Juan Morales  
Marcia Morales  
Maria Aurora Morales  
Miguel Morales  
Noppawan Morales  
Rodrigo Morales  
Santiago Morales  
Luis E. Morales-Buenrostro  
Daniela Morales-Espinosa  
Rosario Morales-Espinosa  
Sonia Morales-Miranda  
Jorge Morales-Montor  
J. Morales-Rosello  
Adriana Morales-Trejo  
Hector Mora-Montes  
Bruce Moran  
Charles Moran  
Chris Moran  
David Moran  
Gary Moran

Joe Moran  
Jose Moran  
Mary Moran  
Michael Moran  
Niamh Moran  
Xosé Anxelu G. Morán  
Enrique Morán Tejeda  
Serge Morand  
Maria Moran-Diez  
Ana Morandini  
Jose Moran-Mirabal  
Jamie Morano  
Kevin Morano  
Milena Morano  
Roser Morante  
José Carlos Morante-Filho  
Borja Mora-Peris  
Raphael Morard  
Esmaeil Morasae  
Pietro Morasso  
Manuela Morato  
Lenka Moravcova  
Jirí Moravec  
Henning Morawietz  
Dean Morbeck  
Umberto Morbiducci  
Sonsoles Morcillo  
Alexa Morcom  
Erin Mordecai  
Rua Mordecai  
Benjamin Mordmueller  
Dana Mordue  
I. Mordukhovich  
Debra Moreau  
Regis Moreau  
Richard Moreau  
Jerome Moreaux  
Virginie Moreaux  
Andrea Morehouse  
Ana Paula Moreira  
Daniel Moreira  
Ernesto Moreira  
Gabriel Moreira  
Ivone Moreira  
Joao Moreira  
Leila Moreira  
Leonilde Moreira  
Luis Fernando Moreira  
Maria Aparecida Moreira  
Paula Moreira  
Rodrigo Moreira

Xoaquin Moreira  
Carlos Moreira-Filho  
Etienne Morel  
Franck Morel  
Francois Morel  
Jean-Michel Morel  
Laurence M Morel  
Penelope Morel  
Marie-Christine Morel-Kopp  
Nicolas Morellet  
Annamaria Morelli  
Eugenio Morelli  
Federico Morelli  
Laura Morello  
Kelley Moremen  
Maria Morena  
Beatriz Moreno  
Carmen Moreno  
Claudia Moreno  
Javier Moreno  
Jonathan Moreno  
Juan Antonio Moreno  
Luisa Moreno  
Pablo Moreno  
Sylvain Moreno  
Yara Moreno  
Juan Carlos Moreno Saiz  
Oihana Moreno-Arotzena  
Gema Moreno-Bueno  
M<sup>a</sup> Teresa Moreno-Flores  
Laura Moreno-López  
Ricardo Moreno-Rodríguez  
Anneke Moresco  
Rosamaria Moresco  
Viviana Moresi  
Yannick Moret  
Antonio Moretti  
Marcelo Moretti  
Riccardo Moretti  
Vittorio Moretti  
Ann Morey  
Rayo Morfin-Otero  
Mariza Morgado  
Bryan Morgan  
Daniel Morgan  
Drake Morgan  
Elise Morgan  
Ian Morgan  
James Morgan  
Jason Morgan  
Jennifer Morgan

Jess Morgan  
Jessica Morgan  
John Morgan  
Jonathan Morgan  
Kevin Morgan  
Lucy Morgan  
Matthew Morgan  
Philip Morgan  
Richard Morgan  
Rosemary Morgan  
Sarah Morgan  
Stephanie Morgan  
Steven Morgan  
Victoria Morgan  
William Morgan  
Rachael Morgan-Kiss  
Francesca Morgante  
Lígia Morganti  
Michelangelo Morganti  
Clement Morgat  
Diego Morgavi  
Camilla Morgen  
Maria Grazia Morgese  
Floriana Morgillo  
Emiliano Mori  
Fumiko Mori  
Giorgio Mori  
Hitoshi Mori  
Kazumasa Mori  
Kiyoshi Mori  
Lucia Mori  
Masaaki Mori  
Mattia Mori  
Shintaro Mori  
Shunsuke Mori  
Takefumi Mori  
Tetsuya Mori  
Tomohisa Mori  
Toshifumi Mori  
Tara Moriarty  
Thomas Moriarty  
Hiroki Moribe  
Atieh Moridi  
Mario Luca Morieri  
Takashi Moriguchi  
Yusuke Moriguchi  
Kohji Moriishi  
Kozo Morimoto  
Libby Morimoto  
Naoki Morimoto  
Satoshi Morimoto

Alain Morin  
Charles Morin  
Cory Morin  
Jean Benoit Morin  
Randall Morin  
Shai Morin  
Alberto Morini  
Gabriella Morini  
Sergio Morini  
Akio Morinobu  
Béatrice Morio  
H. Morioka  
Ichiro Morioka  
Tomoaki Morioka  
Andrea Moriondo  
Demetrios Moris  
Naho Morisaki  
Filomena Morisco  
Anselmo Moriscot  
Yoshiyuki Morishima  
Motoyoshi Morishita  
Ryuichi Morishita  
Takashi Morishita  
Teresa Morishita  
Ian Morison  
Mathieu Morissette  
Hironobu Morita  
Masaya Morita  
Satoru Morita  
Shigeki Morita  
Toshisuke Morita  
Wataru Morita  
Yasu Morita  
Gerald Moritz  
Robin Moritz  
Hiroyuki Moriuchi  
Kenta Moriwaki  
Shinichi Moriwaki  
Hidekazu Moriya  
Hideaki Moriyama  
Minoru Moriyama  
Mitsuhiko Moriyama  
Tatsuya Moriyama  
Yuki Morizane  
Tone Morken  
Barbara Morley  
Bruce Morley  
Georgina Morley  
James Morley  
Peter Morley  
Pierre Mormède

Ana Moro  
Esteban Moro  
Pedro Moro  
Ana Moro-Egido  
Diane Morof  
Francisco J Morón  
Renato Morona  
Flaviano Morone  
Jose Morones-Ramirez  
Elisabetta Moroni  
Gota Morota  
Michael Morowitz  
Ludmilla Morozova-Roche  
Russell Morphew  
Giulia Morra  
Mostafa Morra  
Nuria Morral  
Sarah Morran  
Hans Morreau  
C. Jane Morrell  
Maureen Morrin  
Aaron Morris  
Alison Morris  
Ann Morris  
Brian Morris  
Carol Morris  
Christopher Morris  
Claudia Morris  
David Morris  
Douglas Morris  
Gilbert Morris  
James Morris  
John Morris  
Katherine Morris  
Kevin Morris  
Luc Morris  
Margaret Morris  
Meg Morris  
Michele Morris  
Molly Morris  
Paul Morris  
Peter Morris  
Rebecca Morris  
Richard Morris  
Shaun Morris  
Sheldon Morris  
Steven Morris  
Van Morris  
Zachary Morris  
Donald Morrison  
Ivan Morrison

Katherine Morrison  
Kathleen Morrison  
Kathryn Morrison  
Lynda Morrison  
Rob Morrison  
Sherie Morrison  
Trudy Morrison  
Vicky Morrison  
Naomi Morrissette  
Anne Morrissey  
Christy Morrissey  
Eimear Morrissey  
Doralisa Morrone  
Giovanni Morrone  
Jennifer Morrow  
Johnica Morrow  
Richard Morrow  
Joachim Morschhäuser  
Caryn Morse  
David Morse  
Gene Morse  
Michael Morse  
Wayde Morse  
Herbert Morse III  
Alexander Mörseburg  
John Morser  
Bashir Morshed  
Saam Morshed  
Dina Morshedi  
Richard Mort  
Renato Mortara  
Marina Mortati Dias  
Beatriz Morte  
Ashley Mortensen  
Chris Mortensen  
Motazakker Morteza  
Arthur Mortha  
Geert Mortier  
Alec Morton  
Ben Morton  
Cynthia Morton  
Geraint Morton  
Gerard Morton  
James Morton  
Jennifer Morton  
Katie Morton  
Golam Mortuza  
Alicia Morugan  
Joanna M Morys  
Anita Morzillo  
Marco Moscarelli

Alessandro Moscatelli  
David Moscatelli  
Roberto Moschetti  
Marco Moschetta  
Peter Moschovis  
Salerwe Mosebi  
Hunter Moseley  
Michael Moseley  
Mosepele Mosepele  
André Moser  
Florian Moser  
Franklin Moser  
Jason Moser  
Katrina Moser  
Markus Moser  
René Moser  
Susan Moser  
Harold Moses  
Nick Mosey  
Fausta Mosha  
Han Moshage  
Deane Mosher  
Javid Moslehi  
Jonathan Mosley  
Ian Moss  
Jacqueline Moss  
Laura Moss  
Madonna Moss  
Sarah Moss  
T. Moss  
Travis Moss  
Enrico Mossello  
Richard Mosser  
Peter Mossey  
Jim Mossman  
Joel Mossong  
Heba Mostafa  
Ehsan Mostafavi  
Sara Mostafavi  
Elahe Mostaghel  
Mohammad Mostofa  
Anna Moszczynska  
Luís Mota  
Manuel Mota  
Paula Mota  
Babu Motagi  
Achenef Motbainor  
Bianca Mothé  
Carmel Mothersill  
Mohammad Reza Safari Motlagh  
Lukas Motloch

Norio Motohashi  
Ikuko Motoike  
Chie Motono  
Yuri Motorin  
Edith Motschall  
Elizabeth Motta  
Fábio Motta  
Daisy Motta-Santos  
Hans Motte  
Roberto Motterlini  
Denis Mottet  
Shan Mou  
Xiaozhen Mou  
Zhonglin Mou  
Dany Pascal Moualeu  
Pauline Mouawad  
Kamal Moudgil  
Gregory Mouille  
Ahmad Moujahed  
Abdelmalik Moujahid  
Judd Moul  
John Moulder  
Richard Moulding  
Panagiotis Moulos  
John Moult  
Lawrence Moulton  
Michael Moulton  
Stephane Mouly  
Luke Mounce  
Lourdes Mounien  
Kate Mounsey  
George Mount  
Giorgos Mountrakis  
Nina Mounts  
John Mountz  
Giannis Mountzios  
Kostas Mountzouris  
Claire Mouquet-Rivier  
Alexandra Moura  
Egberto Gaspar Moura  
Mirian Moura  
Ana M. Moura-da-Silva  
Gulherme Mourao  
Miguel Mourato  
Johann Mourier  
Rogier Mous  
Ahmed Mousa  
Haider Abdul-Lateef Mousa  
Mohamed Mousli  
Ahmed Moussa  
Mehdi Moussaid

N. Moussaoui  
Nabila Moussaoui  
Aline Moussard  
Normand Mousseau  
Dina Moustafa  
Mahmoud Moustafa  
Mohamed Moustafa  
Naïma Moustaid-Moussa  
Petros Moustardas  
Dimitrios Moutopoulos  
Christina Moutsiana  
Athanasia Mouzaki  
Dionysios Mouzakis  
Farahnaz Movahedzadeh  
Hesam Movasagh  
Jamileh Movassat  
Allan Mowat  
Danielle Mowery  
Sarah Mowry  
Linda Moxey  
John Moxnes  
Joe Moxon  
Cristina Moya  
Mark Moyad  
Francisco Moyano  
Nieves Moyano  
Cheryl Moyer  
Jeffrey Moyer  
Scott Moye-Rowley  
Amie Moyes  
Andrew Moyes  
David Moyes  
K. Moyes  
Robert Moyle  
Wendy Moyle  
Sizulu Moyo  
Robert Moyzis  
Hadi Mozafari  
Masoud Mozafari  
Mikhail Mozerov  
Pallab Mozumder  
Andrea Mozzarella  
Arthur Mpimbaza  
Anastasios Mpotsaris  
J. Mrázek  
M. Mrinalini  
Krzysztof Mrozek  
Michal Mrug  
Michael Msall  
Gerry Mshana  
T. Mthiyane

Chang-Kao Mu  
Huiling Mu  
Jianbing Mu  
Jung-Jung Mu  
Ren Mu  
Tingwei Mu  
Wanmeng Mu  
Wenbo Mu  
Xian-Yun Mu  
Yifen Mu  
Yuguang Mu  
Chatchai Muanprasat  
Davoodbasha MubarakAli  
Samira Mubareka  
Adele Mucci  
Giulio Muccioli  
Wellington Muchero  
Antoine Muchir  
Martin Mücke  
Thomas Mücke  
Eric Mucker  
Mauricio Mudadu  
Joseph Mudd  
Giridhar Mudduluru  
Mary Beth Mudgett  
Amritpal Mudher  
Maria Mudryj  
Gary Muehlbauer  
Jochen Muehlschlegel  
Ann-Kristin Mueller  
Benjamin Mueller  
Beth Mueller  
Casey Mueller  
Christian Mueller  
Christopher Mueller  
Dominik Mueller  
Elizabeth Mueller  
Erik Mueller  
Eugene Mueller  
Gregory Mueller  
Johannes Mueller  
Judith Mueller  
Karsten Mueller  
Markus Mueller  
Martin Mueller  
Notger Mueller  
Rebecca Mueller  
Scott Mueller  
Sebastian Mueller  
Steffen Mueller  
Thomas Mueller

Doris Mueller-Doblies  
Christoph Mueller-Pfeiffer  
Oliver Mueller-Stricker  
Marcus Muench  
Peter Muennig  
S. Muenst  
Christian Muenz  
Joseph Muenzer  
Julia Muenzker  
Anne Muesch  
Kim Mueser  
Stefan Muetzel  
Ilgiz Mufazalov  
Alexis-Michel Mugabushaka  
Raja Mugasimangalam  
Sam Mugford  
Javier Muguerza  
Teja Muha  
A. Muhammad  
Muhammad Marwan Muhammad Fuad  
Abdul Kadar Muhammad Masum  
M. Mühlau  
Kristin Mühldorfer  
Paul Muhle  
Marianne Muhlebach  
Paul Muhle-Karbe  
Christian Mühlfeld  
Paolo Muiesan  
Amanda Muir  
Keith Muir  
Kanae Mukai  
Galina Mukamolova  
Samson Mukaratirwa  
Liliane Mukaremera  
Geetha Mukerji  
Tapan Mukerji  
A. Mukherjee  
Jean Mukherjee  
Jogeshwar Mukherjee  
Konark Mukherjee  
Nabanita Mukherjee  
Pranab Mukherjee  
Pulok K. Mukherjee  
Raju Mukherjee  
Satyam Mukherjee  
Shrabani Mukherjee  
Murembiwa Mukhola  
Abhiroop Mukhopadhyay  
Anirban Mukhopadhyay  
Bani Mukhopadhyay  
Debashis Mukhopadhyay

Partha Mukhopadhyay  
Rupak Mukhopadhyay  
Sangita Mukhopadhyay  
Satinath Mukhopadhyay  
Maowia Mukhtar  
Trilochan Mukkur  
Fungai Mukome  
Sharif Mukul  
Harshini Mukundan  
Joram Mul  
Agata Mulak  
Ajitkumar Mulavara  
Lawrence Mulcahy  
Nicholas Mulcahy  
Christa Mulder  
Mark Mulder  
Pamela Mulder  
Petra Mulder  
Eavan Muldoon  
Katherine Muldoon  
Sarah Muldoon  
Flavia Mule  
Albert Mulenga  
Rosario Muleo  
Rita Mulherkar  
Shalaka Mulherkar  
Adrian Mulholland  
Padraig Mulholland  
Pablo Mulieri  
Luke Mullany  
Isis Mullarky  
Craig Mullen  
M. Mullen  
Sean Mullen  
Tim Mullen  
William Mullen  
Christo Muller  
Elmi Muller  
Ferenc Muller  
François L.L. Muller  
Laurent Muller  
William Muller  
Yunhua Muller  
Andreas Müller  
Astrid Müller  
Barbara Müller  
Bettina Müller  
Caroline Müller  
Dafne Müller  
Hans-Peter Müller  
Henning Müller

Henry Müller  
Hermann Müller  
Johannes Müller  
Kristina Müller  
Marcel Müller  
Markus Müller  
Martin Müller  
Susanne Müller  
Thomas Müller  
Thorsten Müller  
Tobias Müller  
Viktor Müller  
Florian Müller-Dahlhaus  
Jennifer Mulligan  
Christopher Mullin  
Gerard E. Mullin  
Conrad W. Mullineaux  
Lucille Mullins  
Niamh Mullins  
Robert Mullins  
Benjamin Mullish  
Joaquim Mullo  
Barbara Mulloy  
Siva Mulpuru  
Melissa Mulraney  
Daniel Mulrooney  
Gerd Multhaup  
Gerhard Multhaup  
Yeshalem Mulugeta  
Kelly Mulvey  
John Mulvihill  
Minal Mulye  
Joyce Mumah  
K. Mummenhoff  
Eun-Young Mun  
Masanori Munakata  
Daniele Munari  
Sarah Munce  
Steven Muncer  
Elizabeth Munch  
Inger Christine Munch  
Jan Munch  
Andreas Mund  
John Munday  
Philip Munday  
Emily Mundorff  
Roger Mundry  
Christopher J. Mundy  
William Mundy  
Tomoatsu Mune  
Alejandro Múnera

Jun Muneuchi  
Chris Mungall  
Joshua Munger  
Kassandra Munger  
Kristen Munger  
Givemore Munhenga  
Carolina Munhoz  
Renato Munhoz  
Nira Munichor  
Tariq Munir  
Arasambattu Kannan Munirajan  
Sakthivel Muniyan  
Raquel Muñiz-Salazar  
Carmine Munizza  
Samuel Munjita  
Carsten Münk  
Tamara Munkemuller  
Sarah Munkholm  
Maureen Munn  
Sergi Munné-Bosch  
Alvaro Munoz  
Colleen Munoz  
Francisco Munoz  
Raquel Munoz  
Ana Maria Muñoz  
Carlos Muñoz  
Estela Muñoz  
Juan Muñoz  
Luis Muñoz  
Miguel Muñoz  
Mónica Muñoz  
Nacira Muñoz  
Pilar Muñoz  
Miquel Muñoz Pérez  
Carmen Muñoz-Almagro  
Teresita Muñoz-Antonia  
Isabel Muñoz-Barroso  
Juan Luis Muñoz-Bellido  
R. Munoz-Cano  
José A. Muñoz-Cueto  
José M. Muñoz-Felix  
Gustavo Muñoz-Fernández  
Cesar Munoz-Fontela  
Violeta Muñoz-Fuentes  
Manuel Munoz-Herrera  
Angelica Muñoz-Meléndez  
Maritza Muñoz-Pareja  
Maria Teresa Munoz-Quezada  
Miriam Munoz-Rojas  
Claudia Munoz-Zanzi  
Erin Munro

Mac Munro  
Anjana Munshi  
Erik Munson  
Stefan Münster  
Andrea Münsterberg  
Andrew Muntean  
Shannon Munteanu  
Francesco Muntoni  
Matthias Munz  
Zuzana Münzbergová  
Thomas Münzel  
Anne-Christine Mupepele  
Ivan Mura  
Mohammad Hassan Murad  
Yoshihiro Muragaki  
Koji Murai  
Noriyuki Murai  
Hiroshi Murakami  
Ikuya Murakami  
Kenji Murakami  
Mario Murakami  
Masashi Murakami  
Michio Murakami  
Tomoaki Murakami  
Yoshiki Murakami  
Yuki Murakami  
Takayuki Murakoshi  
Chisako Muramatsu  
Giacomo Murana  
Eduard Murani  
Konstantin Muranov  
Pavel Muranski  
Wayne Muraoka  
Yuki Muraoka  
Elena Muraro  
Paolo Muraro  
Jonathan Muraskas  
Mariko Murata  
Shigeo Murata  
Takatoshi Murata  
Takayuki Murata  
Claudia Muratori  
Moses Muraya  
Louisa Murdin  
David Murdoch  
Giuseppe Murdolo  
Dafin Muresanu  
Joseph Muretta  
Walter Murfee  
Harvey Murff  
Roberto Murgas

Chris Murgatroyd  
Alessandra Murgia  
Alessio Murgia  
Carla Murgia  
Leonardo Murgiano  
Juan Murias  
R. Murillo  
Marina Murillo-Arcila  
Juan Murillo-Maldonado  
Jeffrey Murley  
Kevin Murnane  
Bridin Murnion  
Andrés Muro  
Manuel Muro  
Yoshinao Muro  
Sergio Murolo  
Hiroyuki Murota  
Susumu Muroya  
Adrianna Murphy  
Alex Murphy  
Barbara Murphy  
Brian Murphy  
Carol Murphy  
Dean Murphy  
Dennis Murphy  
Edward Murphy  
Erin Murphy  
Fionnuala Murphy  
John Murphy  
Kate Murphy  
Kenan Murphy  
Michael Murphy  
Paddy Murphy  
Peter Murphy  
Regina Murphy  
Richard Murphy  
Robert Murphy  
Ryan Murphy  
Shannon Murphy  
Timothy Murphy  
Robert Murphy Jr.  
Emerson Murphy-Hill  
Joanne Murphy-Ullrich  
Alan Murray  
Alison Murray  
Andrea Murray  
Brad Murray  
Cathryn Murray  
Danielle Murray  
Deirdre Murray  
Emily Murray

Graeme Murray  
Grant Murray  
Greg Murray  
Gregg Murray  
James Murray  
Joanna Murray  
John Murray  
Kevin Murray  
Kristy Murray  
Lyndsay Murray  
Paul Murray  
Robert Murray  
Laura Murray-Kolb  
Ebony Murrell  
Mora Murri-Pierri  
James Murrough  
Monzur Murshed  
Silvane Murta  
Michael Murtaugh  
G. Murtaza  
Muhammed Murtaza  
Amy Murtha  
Padma Murthi  
Srinivas Murthy  
Sriyutha Murthy  
Venkatesh Murthy  
Lasse Murtomäki  
Alejandro Murua  
Kadarkarai Murugan  
N. Arul Murugan  
S. Murugan  
Amudhan Murugesan  
Ahmed Musa  
Michael J Musacchio  
Imadidden Musallam  
Marcelo Muscará  
Beate Muschalla  
Moritz Muschaweck  
Rashelle Musci  
Giovanna Muscogiuri  
Evan Muse  
Mario Musella  
Eustasius Musenge  
Philippe Musette  
Nick Musi  
Massimo Musicco  
Erik Musiek  
Victor Musiime  
Sergey Musikhin  
Vijaya Musini  
Eri Muso

David Musoke  
Dmitry Musolin  
Antonino Musolino  
Godfrey Musoro  
Ferdinando Mussa-Ivaldi  
Michele Mussap  
Jeffrey Musser  
Siegfried Musser  
Boris Musset  
Margherita Mussi  
Andreas Müssigbrodt  
Tofy Mussivand  
S.M. Mussmann  
Steven Mussmann  
Abu S. Mustafa  
Ahmed Mustafa  
Kamal Mustafa  
M. Mustafa  
Mohd Rais Mustafa  
Osama Mustafa  
Devkumar Mustafi  
Ananda Mustafiz  
Mustapha Mustapha  
Julie Mustard  
Mathias Muszlak  
Toshizumi Muta  
Vivek Mutalik  
Marko Mutanen  
Effie S. Mutasa-Göttgens  
Carol Mutch  
Nicola Mutch  
Alexandr Muterko  
Günther Muth  
Norris Muth  
Mehanathan Muthamilarasan  
Lucy Mutharia  
Gladson Muthian  
Jens-Oliver Muthmann  
Magesh Muthu  
Suresh Muthukumaraswamy  
R. Muthuraj  
R. Muthurajan  
Stella Muthuri  
Hariharan Muthusamy  
Natarajan Muthusamy  
Saminathan Muthusamy  
Kerim Mutig  
Benjamin Mutin  
Apiwat Mutirangura  
Onur Mutlu  
Unal Mutlu

Evren Mutlugun  
Jun Muto  
Tatsushi Mutoh  
Mutsa Mutowo  
Ankur Mutreja  
H. Mutsaerts  
Nico Mutters  
Jasdeep Mutti  
Luciano Mutti  
Winifred Mutuku  
Massy Mutumba  
Ephantus Muturi  
Philippe Mutwa  
Venkateshwar Mutyam  
Rüdiger Mutz  
Greg Mutze  
Kathrin Mutze  
Olav Muurlink  
Monde Muyoyeta  
Otto Muzik  
Javier Muzon  
Vladimir Muzykantov  
Innocenzo Muzzalupo  
Mercy Mvundura  
Violet Mwaffo  
Amos Deogratius Mwaka  
Benson Mwangi  
Matilu Mwau  
Mark Myatt  
Elmarie Myburgh  
Renier Myburgh  
Terence Myckatyn  
Laura Mydlarz  
Robert Myerburg  
Alan Myers  
Amanda Myers  
Candice Myers  
Christopher Myers  
Corinne Myers  
Jennifer Myers  
Kevin Myers  
Kristin Myers  
Leann Myers  
Scott Myers  
Timothy Myers  
Samuel Myers Jr.  
Mary Myerscough  
Merle Myerson  
Hellen Myezwa  
Naja Mygind  
Donald L Mykles

Sean Myles  
Mathios Mylonakis  
Jonathan Mynard  
Timo Myohanen  
Fumiyoshi Myouga  
Angela Myracle  
Tyler Myroniuk  
Arben Myrta  
Knut Myrvold  
Barbara Mysona  
Indira Mysorekar  
Atle Mysterud  
Karthikeyan Mythreye  
Joanniis Mytilineos  
Jihwang Myung  
Soon Chul Myung  
Marie N'Diaye  
Chan-Hyun Na  
Dong Na  
Il-Kang Na  
Muzi Na  
Thierry Naas  
Kesara Na-Bangchang  
S. Masood Nabavizadeh  
Mostafa Nabawy  
M. Naber  
Steffie Naber  
Toru Nabika  
Joao Nabout  
Juliet Nabyonga-Orem  
Samia Naccache  
Abdeldjalil Naceri  
Raffael Nachbagauer  
Mathieu Nacher  
Senthil Kumar Nachimuthu  
Vishnu Varthini Nachimuthu  
Paul Nachtigall  
Max Nachury  
Lorina Naci  
Yamama Naciri  
Maliwan Naconsie  
Philippe Nacry  
Altafhusain Nadaf  
Chiara Nadai  
Ernest Nadal  
Jean-Pierre Nadal  
Jesús Nadal  
Marcos Nadal  
Yuji Nadatani  
Vincenzo Naddeo  
Jay Nadeau

Stephen Nadeau  
Sajid Nadeem  
Knut Nadelhoffer  
Koonlawee Nademanee  
Helena Nader  
Ingo W. Nader  
Nader Nader  
Mercader Nadia  
Nael Nadif Kasri  
Satish Nadig  
Nagalakshmi Nadiminty  
Sarah Nadimpalli  
Jerry Nadler  
Celine Nadon  
Marc Nadon  
Sophie Nadot  
Wilson Nadruz Jr.  
Sergiy Nadtochiy  
Robert Naeije  
Lisbeth Naess  
Dilip Nag  
Tapas Nag  
Yukitoshi Nagahara  
Maria Nagai  
Taku Nagai  
Takashi Nagaishi  
Jyothi Nagajyothi  
Kumaran Nagalingam  
Hidetoshi Nagamasu  
Masanori Nagamine  
Athi N. Naganathan  
Seiichi Nagano  
Yuriko Nagano  
Kyoko Nagao  
Norio Nagao  
Shoji Nagao  
Kentaro Nagaoka  
T. Nagaoka  
Tadahiro Nagaoka  
Mahesh Nagappa  
Amruthesh Kestur Nagaraj  
Ramaiah Nagaraja  
Sharath Nagaraja  
Sridevi Nagaraja  
T. G. Nagaraja  
Tavarekere N. Nagaraja  
Niranjan Nagarajan  
Priyadharsini Nagarajan  
Rajamani Nagarajan  
Prabha Nagareddy  
Rana Nagarkatti

Kazue Nagasawa  
Tasuku Nagasawa  
Daisuke Nagata  
Jason Nagata  
Noriyo Nagata  
Tetsuya Nagata  
Yukihiro Nagatani  
Jiro Nagatomi  
Satoshi Nagayama  
Mohammed Nagdee  
Armin Nagel  
Bonnie Nagel  
Maria Nagel  
Raimund Nagel  
Stefan Nagel  
Thomas Nagel  
Valentin Nagerl  
Jurgen Naggert  
Susanna Naggie  
Chandrashakaharam Nagineni  
Maurice Nagington  
Elizabeth Nagle  
James Nagler  
Narihito Nagoshi  
Rodney Nagoshi  
Tomohisa Nagoshi  
B.N. Nagpal  
Seema Nagpal  
Varun Nagpal  
Deepak Nagrath  
Elisabeth Nagy  
Éva Nagy  
István Nagy  
László Nagy  
Nándor Nagy  
Zoltan Nagy  
Zoltán T. Nagy  
Kyeongah Nah  
Maurice Nahabedian  
Vinayak Nahar  
A. Naheed  
Hareth Nahi  
Catarina Nahlén Bose  
Moon Nahm  
Marcos Nahmad  
Rooban Nahomi  
Azin Nahvijou  
Antonella Nai  
Saraladevi Naicker  
Andrew Naidech  
Stanley Naides

Kershney Naidoo  
Pren Naidoo  
Robin Naidoo  
Akhilender Naidu  
Rahki Naik  
Ram Naikawadi  
A. Naiki-Ito  
Naim Naim Maalouf  
David Naimark  
Timothy Naimi  
Amrinder Nain  
Chandrasekar Nainarpandian  
Cho Naing  
Ajay Nair  
Anil Nair  
Dina Nair  
Jayasree Nair  
Manisha Nair  
Meera Nair  
Nisanth Nair  
P. K. Ramachandran Nair  
Rajesh Nair  
Rajeshwari Nair  
Satish Nair  
Sujithkumar Nair  
Brittany Nairn  
Campbell Nairn  
Ramez Nairooz  
Robert Naismith  
Masanori Naito  
Yoshiro Naito  
Takeshi Naitoh  
Tasnim Najaf  
Mehdi Najafzadeh  
Kayvan Najarian  
Lukáš Najdekr  
Ullah Najeeb  
Hossein Najmabadi  
Kazumi Nakabayashi  
Tsutomu Nakada  
Susumu Nakae  
Hironori Nakagami  
Etsuko Nakagami-Yamaguchi  
Fumiyo Nakagawa  
Kazuo Nakagawa  
Kiyotaka Nakagawa  
Masanori Nakagawa  
Naoki Nakagawa  
Osamu Nakagawa  
Shigeki Nakagawa  
Shin Nakagawa

Shinsuke Nakagawa  
Shunsuke Nakagawa  
Takahiko Nakagawa  
Tsuyoshi Nakagawa  
Yoshinori Nakagawa  
Shigeki Nakagome  
Tsutomu Nakahara  
Michiko Nakai  
Yousuke Nakai  
Peter Nakaji  
Katsuyuki Nakajima  
Kei Nakajima  
Kenichi Nakajima  
Kenichiro Nakajima  
Motowo Nakajima  
Shinichiro Nakajima  
Mayuko Nakamaru  
Kentaro Nakaminami  
Kent Nakamoto  
Robert Nakamoto  
Shingo Nakamoto  
Akihiro Nakamura  
Akinobu Nakamura  
Fabio Nakamura  
Fumio Nakamura  
H. Nakamura  
Haruki Nakamura  
Hitomi Nakamura  
Kazufumi Nakamura  
Kazuhiko Nakamura  
Masato Nakamura  
Mashio Nakamura  
Michinari Nakamura  
Mieko Nakamura  
Miho Nakamura  
Mio Nakamura  
Motoaki Nakamura  
Satoki Nakamura  
Satoko Nakamura  
Shin-ichi Nakamura  
Shugo Nakamura  
Takashi Nakamura  
Takuya Nakamura  
Tatsufumi Nakamura  
Tomoki Nakamura  
Tomomichi Nakamura  
Tsutomu Nakamura  
Yoshiki Nakamura  
Toru Nakanishi  
Toshio Nakanishi  
Yoshinobu Nakanishi

Damalie Nakanjako  
Daisuke Nakano  
Eliana Nakano  
Koji Nakano  
Satoshi Nakano  
Tamami Nakano  
Atsuhito Nakao  
Lia Nakao  
Shintaro Nakao  
Christos Nakas  
Junsuke Nakase  
Akio Nakashima  
Hiroaki Nakashima  
Kazuo Nakashima  
Rieko Nakata  
Yoshio Nakata  
Yoshihisa Nakatani  
Hitoshi Nakatogawa  
Tetsuya Nakatoh  
Yoshimichi Nakatsu  
Teruaki Nakatsuji  
Haruaki Nakaya  
Naoki Nakaya  
Tadashi Nakaya  
Hideki Nakayama  
Jiro Nakayama  
Kazuhiro Nakayama  
Koji Nakayama  
Masaaki Nakayama  
Shingo Nakayamada  
Takefumi Nakazawa  
Toru Nakazawa  
Inaam Nakchbandi  
Maryam Nakhaei  
Hira Nakhasi  
Luay Nakhleh  
Morad Nakhleh  
Ethel Nakimuli Mpungu  
Lydia Nakiyingi  
Nienke Nakken  
Teofil Nakov  
Harikrishna Nakshatri  
Vamsi J. Nalam  
Kodanda Rami Reddy Nalapa Reddy  
Luigi Naldi  
Allison Naleway  
Ma. Jenina Nalipay  
Eugene Nalivaiko  
Mike Nalls  
Jarlath Nally  
Nicolas Nalpas

Hojung Nam  
Hong Gil Nam  
Kyoung Hee Nam  
Yunjun Nam  
Gautham Namasivayam  
Subhalaxmi Nambi  
Byju Nambidiyattil Govindan  
Sreejith Namboodiri  
Vijay Mohan Namboodiri  
Dmitry Namgaladze  
Ho Namkoong  
Amine Namouchi  
Hongmei Nan  
Weizhi Nan  
Gayani Nanayakkara  
Daisuke Nanba  
Y.V. Nancharaiah  
David Nanchen  
Vikas Nanda  
Jayakrishnan Nandakumar  
Saikat Nandi  
Shyamal Nandi  
Sulakshana Nandi  
Vijay Nandula  
Sushmita Nandy  
Tina Nane  
Deepak Nanjappa  
Som Nanjappa  
Meera Nanjundan  
Joaniter Nankabirwa  
Toshihiro Nanki  
Sara Nannarone  
Laura Nanni  
Gerrit Nanninga  
Rebecca Nantanda  
Chanin Nantasenamath  
Julie Nantel  
Nanda Nanthakumar  
Noelina Nantima  
Zvi Naor  
Marina Naoumkina  
Kathrin N pflin  
Bruce Napier  
T. Celeste Napier  
Thiago Napole o  
Marcelo Napoli  
Nicola Napoli  
Pietro Napoli  
L. Christian Napp  
Herbert Nar  
Ram Naraian

Satoshi Naramoto  
Vivek Naranbhai  
Atul Narang  
Ritu Narang  
A. Naranjo  
David Naranjo  
Steve Naranjo  
Steven Naranjo  
Victoria Naranjo  
Giri Narasimhan  
Shuba Narasimhan  
Markus Narath  
Gopeshwar Narayan  
Prakash Narayan  
Prema Narayan  
Sanjiv Narayan  
Badri Narayanan  
Chitra Narayanan  
Divya Narayanan  
Karthikeyan Narayanan  
Nandakumar Narayanan  
Sampath Narayanan  
Ganesh Narayanasamy  
Francesca Nardecchia  
Ed Nardell  
Enio Nardi  
Flavia Domizia Nardi  
Serenella Nardi  
Claudio Nardiello  
Davide Nardo  
Valerio Nardone  
Simona Nardoza  
Ann Nardulli  
Anjaparavanda Naren  
Nivedita Naresh  
Masashi Narita  
Vihang Narkar  
Steven Narod  
Waldemar Narozny  
Hema Narra  
Georgia Narsavage  
Masataka Narukawa  
Satoshi Narumi  
Kenneth Narva  
Darcia Narvaez  
Tarun Narwani  
Antonio Narzisi  
Fabio Nascimbeni  
Ana Nascimento  
Ana Cristina Nascimento  
Daniele Nascimento

Marcos Nascimento  
Maristela Nascimento  
Rafaella Nascimento  
Luiz Eurico Nasciutti  
Somia Nasef  
Saleh Naser  
Abdelmajeed Nasereddin  
Benjamin Nash  
David Nash  
Denis Nash  
Kirsty Nash  
Madlen Nash  
Merinda Nash  
Robert Nash  
Masayuki Nashimoto  
Sonali Nashine  
Raad Nashmi  
Sazzad Nasir  
Mohammad Javad Nasiri  
Mohammad Nasiriavanaki  
Michael Nasr  
Rihab Nasr  
Maryam Nasr Esfahani  
Fatima Nasrallah  
Gheyath Nasrallah  
Ilya M. Nasrallah  
Lara Nasreddine  
Mohammad-Hossein Nasr-Esfahani  
Abdelmajid Nassar  
Antonio Paulo Nassar Junior  
Jeanette Nassif  
Fatiha Nassir  
Seyed Mahdi Nassiri  
Gabriel Nastase  
K. Nasu  
Tiago Natal-da-Luz  
Valerie Natale  
Antonino Natalello  
Andrea Natali  
Charles Natanson  
Lisa Natanson  
Karaba N. Nataraja  
Arutselvan Natarajan  
Chandrasekhar Natarajan  
Jeyakumar Natarajan  
Krishnamurthy Natarajan  
Mohan Natarajan  
Purushothaman Natarajan  
Savithiry Natarajan  
Sivaraman Natarajan  
Viswanathan Natarajan

Baker Nate  
Alexander Nater  
Anick Nater  
Ricarda Nater-Mewes  
Amar Nath  
Aritro Nath  
Biswajit Nath  
Jay Nath  
Kavindra Nath  
Neetika Nath  
Utpal Nath  
Lucas Nathan  
Sheila Nathan  
Andrew Nathanson  
Michael Nathanson  
Ruvandhi Nathavitharana  
Pavan Kumar Nathella  
M. Natic  
Mario Natiello  
Gabriel Natividad  
Yasodha Natkunam  
Atsushi Natsume  
Jacob Nattermann  
Romain Nattier  
Michael Nauck  
Felix Naughton  
Ulrike Naumann  
Anna Naumova  
Shaik Mohammad Naushad  
Fauzia Nausheen  
Chandra Nautiyal  
Prakash Nautiyal  
Mohamad Navab  
Roya Navab  
S. Navakode  
Krupa Navalkar  
Carryl Navalta  
Gabriel Navar  
Mirko Navara  
Michele Navarra  
William Navarre  
Eduardo Navarrete  
Miguel Navarrete  
Eva Maria Navarrete-Muñoz  
David Navarro  
Ferran Navarro  
Isabel Navarro  
J.F. Navarro  
Monica Navarro  
Nicolas Navarro  
Noemi Navarro

Pilar Navarro  
Raúl Navarro  
Rosa Navarro  
Samuel Navarro  
Sandi Navarro  
Lucia Navarro de Lara  
Fernando Navarro-Garcia  
Nora Navarro-Gonzalez  
Juan Navarro-Lopez  
Daniel Navarro-Martinez  
Adolfo Navarro-Sigüenza  
Alfonso Navas  
Josè Maria Navas  
Juan Navas  
Nicolas Navasa  
Adrián Naveda-Rodríguez  
Manuel Navedo  
Babak Navi  
Bradford Navia  
Ali Navid  
Samuele Naviglio  
Ami Navon  
Nora Navone  
Pavla Navratilova  
Nicolas Navrot  
Tadeusz Nawarycz  
Fahim Nawaz  
Agnieszka Nawrocka  
Ahsan Nawroj  
Elizabeth Nawrot  
Martin Nawrot  
Christian Nawroth  
Heinrich Nax  
Francisco Naya  
Alok Nayak  
Arabinda Nayak  
Jayakar Nayak  
Jennifer Nayak  
Ramesh Nayak  
Tapan Nayak  
Ribhu Nayar  
Umit Nayki  
Claire Naylor  
Gavin Naylor  
Justine Naylor  
Sadaf Naz  
Saeeda Naz  
Alison Nazareno  
Javad Nazarian  
Lusine Nazaryan-Petersen  
Mohammad-Reza Nazem-Zadeh

Kim Nazi  
Rashid Nazir  
Mustafa Naziroglu  
Bashoo Naziruddin  
A.S.A. Nazri  
Pietro Nazzaro  
Francesco Nazzi  
Albert Ndagijimana  
Momar Ndao  
Pius Nde  
Rawlance Ndejjo  
Nicaise Ndembi  
Mamadou Ousmane Ndiath  
Joseph Ndisang  
G. Ndrepepa  
Ruth Nduati  
Edjah Nduom  
Bruce Neal  
Joel Neal  
Matthew Neal  
Matthew D. Neal  
Zachary Neal  
Patrick Neale  
Joshua Nealon  
Dimitri Neaux  
Linda Neaves  
Angela Nebbioso  
Alex Nechiporuk  
Sarah Necker  
Len Neckers  
Lucky Nedambale  
Aurora Nedelcu  
Mathieu Nedelec  
Dobrin Nedelkov  
Claire Nedellec  
Paul Nederkoorn  
Christa Nederstigt  
Saharnaz Nedjat  
Lee Nedkoff  
Pavel Nedvetsky  
Sriram Neelamegham  
Aravind Neelavara Ananthram  
Kristina Neely  
Melody Neely  
Robert Neely  
Claire Neema  
Matthias Nees  
Albrecht Neesse  
John Neetu  
Christopher Neff  
Karl Neff

Kristin Neff  
Roni Neff  
Axel Neffe  
Irina Neganova  
Pradeep Singh Negi  
Kazuno Negishi  
Michiro Negishi  
Danilo Neglia  
Sonia Negrão  
Deborah Negrão-Corrêa  
Carlos Negrato  
Florence Negre  
Nicolas Nègre  
Mateus de Oliveira Negreiros  
Oscar Negrete  
Andrew Negri  
Rodolfo Negri  
Sylvie Negrier  
Daniela Negrini  
Stefano Negrini  
Anna Negroni  
Oana Negru-Subtirica  
Deborah Neher  
Arye Nehorai  
Volker Nehring  
Holly Neibergs  
Cornelia Neidlinger-Wilke  
Pascal Neige  
Gretchen Neigh  
Amanda Neil  
Smart Neil  
Tor Neilands  
Chris Neill  
Andrew Neilson  
Julie Neilson  
Alexander Neiman  
Alexander Neimark  
Angelica Neisa  
Jay Neitz  
Ayna Nejad  
Kari Nejak-Bowen  
Fatemeh Nejat-zadeh-Barandozi  
K. Nekaris  
Sergei Nekhai  
Praveen Nekkar Rao  
Ronel Nel  
Leif Nelin  
Rob Nelissen  
Israel Nelken  
Barry Nelkin  
Wolfgang Nellen

Luca Nelli  
Aimee Nelson  
Alan Nelson  
Andrew Nelson  
Andy Nelson  
Annmarie Nelson  
Arnold Nelson  
Brady Nelson  
Charles Nelson  
Corwin Nelson  
Danielle Nelson  
David Nelson  
David M. Nelson  
Erik Nelson  
Gregory N. Nelson  
Kara Nelson  
Kenrad Nelson  
Laura Nelson  
Mark Nelson  
Mike Nelson  
Peggy Nelson  
Peter Nelson  
Randy Nelson  
Rebecca Nelson  
Richard Nelson  
Scott Nelson  
Sherry Nelson  
Stanley Nelson  
Toben Nelson  
William Nelson  
Karl Emil Nelveg-Kristensen  
Houshang Nemati  
Mohammad Ali Nematollahi  
Alexandr Nemeč  
Pavel Nemeč  
Georges Nemer  
Charles Nemeroff  
Benoit Nemery  
Elisa Nemes  
Matthias Nemeth  
Eiji Nemoto  
Tomomi Nemoto  
Tooru Nemoto  
Mateja Nenadovic  
Andrew Nencka  
Nuno Nene  
Ilona Nenko  
Antonio Nenna  
Mei Lin Neo  
Yan Ning Neo  
Charalambos Neophytou

John Neoptolemos  
Madhav Nepal  
Benjamin Nephew  
T. Nepolean  
Pablo Nepomnaschy  
Juan A. Nepomuceno-Chamorro  
Johannes Nepp  
A. Neri  
Christian Neri  
Dario Neri  
Francesco Neri  
Giovanni Neri  
Patrizia Neri  
Tauro Neri  
Andreas Nerlich  
John Nerva  
Clara Nervi  
Jeanne Nervina  
Arthur Nery  
Mariana Nery  
Ingolf Nes  
Amen Ness  
Thomas Ness  
Steffen Nestler  
Marika Nestor  
Peter Nestor  
Mihai Netea  
Chris Netherton  
Lauro Neto  
Theoden Netoff  
Jeniel Nett  
Dan Nettleton  
Regina Netto  
Yael Netz  
Corey Neu  
Andreas Neubauer  
Henning Neubauer  
Thomas Neubauer  
Lis Neubeck  
Arthur Neuberger  
John Neubert  
Reinhard Neubert  
Oliver Neudert  
Stefan Neuenschwander  
Alfred Neugut  
Nina Neuhaus  
Peter Neuhaus  
Duncan Neuhauser  
Anna Neuheimer  
John Neuhoff  
Jeffrey Neul

Eva Neumaier-Probst  
Yair Neuman  
Gabriele Neumann  
Heiko Neumann  
Heinz Neumann  
Inga Neumann  
Jens Neumann  
Johannes Neumann  
Kerstin Neumann  
Markus Neumann  
Roland Neumann  
Wolf-Julian Neumann  
William Neumeier  
Bruno Neuner  
Binod Neupane  
Subas Neupane  
Danielle Neut  
Cécile Neuvéglise  
Jaakko Nevalainen  
Paul Neve  
Richard Neve  
Adriana Neves  
Elizabeth Neves  
Frederico Neves  
Josiane Neves  
Maria Helena Neves  
Helene Neville  
Remington Nevin  
Hannah Nevins  
Cynthia Nevison  
Jason Newbern  
Rodney D. Newberry  
Carrie Newbold  
Sarah Newbury  
Gretchen Newby  
Jill Newby  
L. Kristin Newby  
Dawn Newcomb  
James Newcomb  
George Newcombe  
Peter Newcombe  
Marie-Louise Newell  
Annie Newell-Fugate  
Scott Newey  
Di Newham  
James Newham  
Christina Newhill  
Ian Newhouse  
Jessica Newlin  
Aaron Newman  
Christopher Newman

Dianne Newman  
Eric Newman  
Greg Newman  
Jennifer Newman  
John Newman  
Jonathan Newman  
Mari-Anne Newman  
Molli Newman  
Robert Newman  
Roger Newman  
Roger Newman-Norlund  
David Newman-Toker  
Roger Newport  
David Newsham  
Mary Newsome  
Timothy Newsome  
Allen Newton  
Hayley Newton  
Irene Newton  
Kelly Newton  
Michael Newton  
Peter Newton  
Tim Newton  
Ebba Nexo  
Denise Ney  
Samuel Neymotin  
Helene Neyret-Kahn  
Levent Neyse  
A. Sanati Nezhad  
Katerina Nezvalová-Henriksen  
Charles Nfon  
Adeline S.L. Ng  
Annalyn Ng  
Austin Chin Chwan Ng  
Benedict Ng  
Benjamin Ng  
Carmina Ng  
Caroline Ng  
Chee Ng  
Chin Ng  
Chong Guan Ng  
Colin Ng  
Danny Ng  
Davis Ng  
Eric Ng  
Felix Ng  
Heok Hee Ng  
Jason Ng  
Kevin Tak-Pan Ng  
Kwan Ng  
Lauren Ng

Manwa Ng  
Norman Ng  
Peter Ng  
Raymond Ng  
Shu-Hang Ng  
Sophia Ng  
Terry Ng  
Valerie Ng  
Victoria Ng  
Wan-Fai Ng  
Wei Ng  
Sai-Ming Ngai  
H.W. Ngan  
Tiia Ngandu  
Umakanta Ngangkham  
R. Ngara  
Matilda Ngarina  
Nlandu Ngatu  
Joanne Ngeow  
Oscar Ngesa  
Anaclet Ngezahayo  
Phioanh Nghiempfu  
Nicole Ngo  
Van Ngo  
Jeremiah Ngondi  
Corine Ngufor  
Anthony Ngugi  
John Ngunjiri  
Kenneth Ngure  
Anh Thi Van Nguyen  
Anthony Nguyen  
Bich Nguyen  
Daniel Nguyen  
Hai Nguyen  
Hoang Nguyen  
Hue Nguyen  
Hung Nguyen  
Huong Nguyen  
Jennifer Nguyen  
Khoa Nguyen  
Lam Son Nguyen  
Linh Nguyen  
M. Hong Nguyen  
Mindie Nguyen  
Nam-Phuong Nguyen  
Nguyen Hong Nguyen  
Nha Nguyen  
Patricia Nguyen  
Phuong Nguyen  
Quan Nguyen  
Quang Nguyen

Tam Nguyen  
Thanh Nguyen  
Thao Nguyen  
Thi Bich Ngoc Nguyen  
Thi-Phuong-Lan Nguyen  
Tho Nguyen  
Tung Nguyen  
Ut Nguyen  
Alfred Ngwira  
Ngoc Nham  
Aquino Nhantumbo  
Joo Young Nho  
Andy Ni  
Bing Ni  
Cheng Ni  
Heyu Ni  
Huangjing Ni  
Liqiang Ni  
Michael Ni  
Zhen Ni  
Zhongfu Ni  
Naz Niamul Islam  
Hui Nian  
Ali Niazi  
Javed Niazi  
Nathan Nibbelink  
Emanuele Nicastrì  
Giampaolo Niccoli  
Chris Nice  
Timothy Nice  
Siobhan Nichoileain  
Frank Nicholas  
Jennifer Nicholas  
Richard Nicholas  
Robin Nicholas  
Barbara Nicholl  
Stuart Nicholls  
Tonia Nicholls  
Austin Nichols  
Benjamin Nichols  
Charles Nichols  
Frank Nichols  
James Nichols  
Jeremy Nichols  
Joan Nichols  
Krista Nichols  
Michael Nichols  
Timothy Nichols  
Caroline Nicholson  
Dan Nicholson  
Emily Nicholson

James Nicholson  
Linda Nicholson  
Maribeth Nicholson  
Wayne Nicholson  
Harry Nick  
Bert Nickel  
Christian Nickel  
Jason Nickell  
Robert Nickells  
Martin Nickels  
Stefanie Nickels  
Georg Nickenig  
Kenneth W Nickerson  
D. Nickla  
Stuart Nicklin  
Thomas Nickolas  
Daniele Nico  
Alcina Nicol  
Grant Nicol  
Stephen Nicol  
Steve Nicol  
André Nicola  
Anthony Nicola  
Massimo Nicola  
Alexandru Nicolae  
Herisanu Nicolae  
Gerry Nicolaes  
Nicolas Nicolaidis  
Theodore Nicolaidis  
Ove Nicolaisen  
Gaël Nicolas  
Guillaume Nicolas  
Ezequiel Nicolazzi  
Bruna Nicoletto  
Andrea Nicolini  
Francesco Nicolini  
Franck Nicolini  
Teresa Nicolson  
Roberto Nicosia  
Vincenzo Nicosia  
Franck Nicoud  
Helene Niculita-Hirzel  
Thibault Nidelet  
Bernd Nidetzky  
Aiqing Nie  
Guangjun Nie  
Guiying Nie  
Jing Nie  
Jingxin Nie  
Pin Nie  
Qian Nie

Qinghua Nie  
Yaohui Nie  
Yuqiang Nie  
Zuoming Nie  
Karen Nieber  
Glen Niebur  
Andreas Nieder  
Ellen Niederberger  
Daniel Niederer  
Simone Niederhäuser  
Laura Niedernhofer  
David Niederseer  
Harald Niederstätter  
Matthias Niedrig  
Inga Niedtfeld  
Michelle Niedziela  
Beeri Niego  
James Nieh  
Diederick Niehorster  
Christof Niehrs  
Manel Niell  
Brent Nielsen  
Claus Nielsen  
Clayton Nielsen  
Emil Nielsen  
Finn Nielsen  
Heber Nielsen  
Henrik Nielsen  
Jens Nielsen  
Kaare Nielsen  
Liza Nielsen  
Mark Nielsen  
Nete Munk Nielsen  
Shaun Nielsen  
Søren Nielsen  
Tommy Nielsen  
Christina Nielsen-Leroux  
Anne Nielson  
Jessica Nielson  
Ryan Nielson  
Torsten Nielson  
Marvin Nieman  
Markus Niemann  
Ulrich Niemann  
Hermann Niemeyer  
Jarad Niemi  
Matthew Niemiller  
Anna-Liisa Nieminen  
Jaakko Nieminen  
Juha Niemistö  
Neal Niemuth

Aleksandra Niemyjska  
Sandra Niendorf  
Albert Nienhaus  
Eberhard Nieschlag  
Judith Niesen  
Carien Niessen  
Wiro Niessen  
Gema Nieto  
Nathan Nieto  
Ramfis Nieto-Martínez  
Jose M. Nieto-Villar  
Natalie Nieuwenhuizen  
Pythia Nieuwkerk  
Helene Nieuwoudt  
Caroline Nievergelt  
Stefan Niewiesk  
James Nifong  
Yeshambul Nigatu  
Joel Nigg  
Hugo J. Niggli  
Chandylen Nightingale  
Sheila Nightingale  
Cecilia Nigro  
Giovanna Nigro  
Lisa Nigro  
Steven Nigro  
Caetano Nigro Neto  
Sagar Nigwekar  
Susumu Nii  
Takahiro Niida  
Tomiharu Niida  
Hiroyuki Niihara  
Mamoru Niikura  
Tim Niiler  
Yoshihito Niimura  
Kristjan Niitepõld  
Tomihisa Niitsu  
Ank Nijhawan  
Ard Nijhof  
Reindert Nijland  
Ivan Nijs  
E.R. Nijssse  
Spyros Nikas  
Pablo Nikel  
Etsuo Niki  
Nikos Nikiforakis  
Mikko Nikinmaa  
Jana Nikitin  
Anastasia Nikitina  
Mehdi Nikkhah  
Martin Niklas

Laura Niklason  
Johan Niklasson  
Alexander Nikolaev  
Eugene Nikolaev  
Sergey Nikolaev  
Pantelis G. Nikolakopoulos  
Chistoforos Nikolaou  
Molly Nikolas  
Basil Nikolau  
Dragana Nikolic  
Mikeljon Nikolich  
Zoran Nikoloski  
Anna Nikonova  
Raisa Nikula  
Alexey Nikulin  
Kjell Nikus  
Kanishka Nilaweera  
Richard Niles  
Kayzad Nilgiriwala  
Charles Nilon  
Frank Nilsen  
Kristian Bernhard Nilsen  
Ola Nilsen  
Anders Nilsson  
Erik Nilsson  
Henrik Nilsson  
Lars Nilsson  
Markus Nilsson  
Melanie R Nilsson  
Kristina Nilsson Ekdahl  
Johan Nilvebrant  
Stephen Nimer  
Shahid Nimjee  
Akimoto Nimura  
Andrea Ninfo  
Chuanyi Ning  
Daliang Ning  
Huan Ning  
Kang Ning  
Shunbin Ning  
Xia Ning  
Yongzhong Ning  
Zhangyong Ning  
Shira Ninio  
Elina Nino  
David Nipperess  
Eyal Nir  
S.R. Niranjana  
Henry Nisell  
Hiroshi Nishi  
Shawn Nishi

Yutaro Nishi  
Toshiya Nishibe  
Gohei Nishibuchi  
Atsushi Nishida  
Kohji Nishida  
Motohiro Nishida  
Sachiko Nishida  
Akihiro Nishiguchi  
Michele Nishiguchi  
Ryuichi Nishii  
Kazutoshi Nishijima  
Jun Nishikawa  
Hiroshi Nishimune  
Goro Nishimura  
M. Nishimura  
Noriyuki Nishimura  
Reiki Nishimura  
Tomoko Nishimura  
Yukihide Nishimura  
Adrienne Nishina  
Hiroshi Nishina  
Takashi Nishina  
Ichizo Nishino  
Kunihiko Nishino  
Mizuki Nishino  
Mizuho Nishio  
Shin-ya Nishio  
Shinta Nishioka  
Hideki Nishitoh  
Takumi Nishiuchi  
Junko Nishiwaki  
Chiharu Nishiyama  
Hiroshi Nishiyama  
Masahiko Nishiyama  
Shoko Nishiyama  
Hitoshi Nishizawa  
Alina Niskanen  
Corey Nislow  
Lisa Nissen  
Andrea Nistri  
Kevin Niswender  
John Nitiss  
Lucio Nitsch  
Craig Nitschke  
Anjana Nityanandam  
Bjoern Nitzsche  
Franziska Nitzsche  
Gang Niu  
JianJun Niu  
Jingwen Niu  
Jinzhi Niu

Junqi Niu  
Liang Niu  
Ongge Niu  
Suyan Niu  
Tianhui Niu  
Tianye Niu  
Wenquan Niu  
Wenxin Niu  
Xi Niu  
Xinxin Niu  
Yaron Niv  
Lisa Nivison-Smith  
Brett Nixon  
Mark Nixon  
Sophie Nixon  
Christopher Niyibizi  
Vandana Niyyar  
Ahamed Nizam  
Sheikh Nizamuddin  
Nizar Nizar  
Antonio Nizza  
Sylvestre Njakou Djomo  
Jackson Njau  
M. Njenga  
Emmanuel Njeuhmeli  
Branimir Njezic  
Dolores Njoku  
Maureen Njue  
Njambi Njuguna  
Céline Nkenfou  
Jaqueline Nkhoma  
Kabwe Nkongolo  
Esther Nkuipou Kenfack  
Marcel Nkuize  
Jerome Noailly  
Angela Nobbs  
Clarissa Nobile  
Flavio Nobili  
Anaïs Noblanc  
Charleston Noble  
Linda Noble  
Luke Noble  
Rachel Noble  
William Noble  
Ligia Nobre  
Franklin Nobrega  
Giuseppe Nocella  
Annalura Nocentini  
Joe Nocera  
Luca Nocetti  
Tomonori Nochi

Kotaro Nochioka  
Matthew Nock  
Akiko Noda  
Mami Noda  
Takuji Noda  
Koichi Node  
Justin Nodwell  
Francesco Noè  
Alexandra Noel  
Richard Noel Jr.  
Heidi Noels  
Andre Noest  
Haruo Nogami  
Eishi Noguchi  
Emiko Noguchi  
Hiroshi Noguchi  
Hitoshi Noguchi  
Ko Noguchi  
Masayuki Noguchi  
Satoru Noguchi  
Takako Noguchi  
Y Noguchi  
Yasuki Noguchi  
Yoshihiro Noguchi  
Claudio Nogueira  
Fatima Nogueira  
Maurício Nogueira  
Miguel Nogueira  
Waldo Nogueira  
Guilherme Nogueira-Neto  
Pablo Nogues  
Gyu-Jeong Noh  
Hyunjin Noh  
Jihyun Noh  
MiJin Noh  
Sung Noh  
Anja Nohe  
Amit Noheria  
Quentin Noirhomme  
Eisei Noiri  
Ossi Nokelainen  
Miriam Nokia  
Erica Nol  
Fiona Nolan  
Francis Nolan  
Jessica Nolan  
Laura Nolan  
Seonaid Nolan  
Stefano Nolfi  
Markus Noll  
Ellen Nollen

Martin Nollenburg  
Harry Noller  
Michael Noll-Hussong  
Elke Nolte  
Sandra Nolte  
Kensuke Noma  
Hidetaka Nomaki  
Cristina Nombela  
Josep Nomdedeu  
Jason Nomi  
A. Nomura  
Masatoshi Nomura  
Shosaku Nomura  
Takeshi Nomura  
Yasuyuki Nomura  
Satoko Nonaka  
Michel Nonent  
Yibing Nong  
Maria Noni  
Larisa Nonn  
Michael Nonnemacher  
Ken-Ichi Nonomura  
Justice Nonvignon  
Curtis Noonan  
Douglas Noonan  
Vanessa Noonan  
Chadanat Noonin  
Forhana Rahman Noor  
Khalida Inayat Noor  
Mohamed Noor  
Syed Noor  
M. Noordzij  
Sander Noort  
Sunil Nooti  
Ursula Nopp-Mayr  
Khairun Nain Nor Aripin  
Nurshamimi Nor Rashid  
Gray Nora  
Fernando Norambuena  
Teresa Norat  
Dan Norbäck  
Johannes Norberg  
Margareta Norberg  
Catarina Nordander  
Lars Nordenmark  
Maria Nordfang  
Anna Synnøve Røstad Nordgard  
Tara Nordgren  
Verena Nordhoff  
Robert Nordon  
Rebecca Nordquist

Daniela Nordzieke  
Jon Norenburg  
Mette Nørgaard  
Julian Norghauer  
David Noriega  
Tsuru Noriko  
Suzuki Noriyuki  
Joanna Norkko  
Barbara Norman  
Janette Norman  
Kristina Norman  
Paul Norman  
Philippe Normand  
David Normando  
Simona Normando  
Nicola Normanno  
Benjamin Normark  
Henrique Noronha  
Santosh Noronha  
Marina Noronha Ferraz de Arruda Colli  
Rikke Norregaard  
Gill Norris  
Laura Norris  
Michelle Norris  
Pauline Norris  
Steven Norris  
Grant Norte  
Ace North  
Rachel North  
Diana Northup  
Joelle Nortier  
Gareth Nortje  
Gavin Norton  
George Norton  
Jeanette Norton  
Jeffrey Norton  
Michael I. Norton  
Pamela Norton  
Samuel Norton  
William Norton  
Justice Norvienyeku  
Ken Nosaka  
Andrew Nosal  
Artur Nosalewicz  
Joshua Nosanchuk  
Chiara Nosarti  
Rodrigo Nosedá  
Michael Noseworthy  
Sergei Noskov  
Andrew Noss  
Ralph Nossal

Marika Nosten-Bertrand  
Bohdan Nosyk  
Michael Notaro  
Wim Notebaert  
Justin Notestein  
Warren Nothnick  
Eduardo Notivol  
Davide Noto  
Shoji Notomi  
Caroline Nott  
Ill-Sup Nou  
Xiangwu Nou  
Vincent Nougier  
Semir Nouira  
Anastasios Noulas  
Mazen Nouredin  
Mohammad-Zaman Nouri  
Mehdi Nourozi Nourozi  
Mahdad Noursadeghi  
Deborah Novack  
Victor Novack  
Elizabeth Novak  
Jiri Novak  
Natalija Novak  
Richard Novak  
Julia Novak Colwell  
Fernando Novas  
Andrea Nove  
Antonio Novelli  
Lucia Novelli  
Giovanni Novembre  
Mairi Noverr  
Gina Novick  
Peter Novick  
Richard Novick  
Dmitry Novikov  
M. Lelinneth (Len) Novilla  
Chad Novince  
Marta Novo  
Pedro Novo  
Shenia Novo  
Ana Novoa  
Alexey A. Novoselov  
Moritz Nowack  
Andrzej Nowak  
Carsten Nowak  
Glen Nowak  
Renata Nowak  
Robert Nowak  
Roman Nowak  
Romana Nowak

Stefan Nowak  
Thaddeus Nowak  
Monika Nowak-Imialek  
Adam Nowakowski  
Alexandra Nowakowski  
Andrzej Nowakowski  
Khalid Nowar  
Katarzyna Nowicka-Sauer  
Bogdan Nowicki  
Cristina Nowicki  
Piotr Nowicki  
Cindy Nowinski  
Krzysztof Nowosielski  
Norbert Nowotny  
Ariela Noy  
Ilan Noy  
Noa Noy  
Genevieve Noyce  
Noelle Noyes  
Andrew Noymer  
Marilyn Noz  
Miho Nozaki  
Sylvie Nozaradan  
Ala Nozari  
Hajime Nozawa  
Susan Nozell  
Tomoko Nozoye  
Kandai Nozu  
Silvia Nozza  
Sabin Nsanzimana  
Célestin Ndosimao Nsibu  
George Ntaios  
Jackson Nteeba  
Vardis Ntoukakis  
Francis Ntumngia  
Paolo Nucci  
Michael Nuccio  
Richard Nuccitelli  
Carmelo Nucera  
Jürg Nuesch  
Rolf Nuesing  
Alan Nugent  
Jim Nugent  
Michael Nugent  
Nicole Nugent  
Mark Nuijten  
Hitoshi Nukada  
R. Nulit  
Amit Nulkar  
Kazuyuki Numakura  
Keiji Numata

Alexandra Nunes  
Altacílio Nunes  
Bruno Nunes  
Manoel Nunes  
Maria Nunes  
Vania Nunes  
Ulisses Nunes da Rocha  
Lígia Nunes de Morais Ribeiro  
Adriano Nunes-Nesi  
Caroline Nunes-Xavier  
Alfredo Nunez  
Antonio Nunez  
Silvia Nunez  
Cristina Núñez  
José Núñez  
Marco T. Núñez  
Juan Núñez-Farfán  
Ivan Nunez-Gill  
Charles Nunn  
Joanne Nunnerley  
Leonard Nunney  
Juan Carlos Nuño  
Natalia Nuño  
Takuro Nunoura  
Kulmira Nurgali  
Alessandra Nurisso  
Gertrud K. Nürnberg  
Yuana Nurulita  
Dmitri Nusinow  
Asma Nusrat  
Robert Nussbaum  
Thomas Nussbaumer  
Ruth Nussinov  
Stephen Nutt  
Alfred Nuttall  
Amy Nuttall  
James Nuttall  
Kristo Nuutila  
Iman Nuwayhid  
Anne Monique Nuyt  
Regina Nuzzo  
Chike Nwabuo  
Tibor Nyari  
Árpád Nyári  
Anna Nyberg  
Laura Nyblade  
Hilde Nybom  
Karine Nyborg  
Janet Nye  
Henrik Nygård  
Brendan Nyhan

Erika Nyhus  
Philip Nyhus  
Sylvia Nyilas  
Ildiko Nyilasi  
Miklos Nyitrai  
László Nyitray  
Ivan Nyklicek  
Karin Nylander  
Susanne Nysten  
Göran Nylund  
Andy Nyman  
Charles Nyman  
Jeffry Nyman  
Paul Nyquist  
Johanna Nystedt  
Fredrik Nystrom  
Lennarth Nyström  
Justine Nzweundji  
Manoj Oak  
Christopher Oakes  
Jessica Oakes  
Patrick Oakes  
Scott Oakes  
Berl Oakley  
Brian Oakley  
Miranda Oakley  
Megan Oaten  
James Oates  
Thomas Oates  
Desmond Oathes  
Jon Oatley  
Jeremy Oats  
Victor Obach  
Akira Obana  
Joshua Obar  
Boguslaw Obara  
Isaiah Obara  
Marcos Obara  
Taku Obara  
Keisuke Obase  
Alvaro J. Obaya  
Darren Obbard  
Glen Obear  
Rima Obeid  
Anna C. Obenauf  
Holly Ober  
Raimund Ober  
Martin Oberbarnscheidt  
Anita Oberbauer  
Daniel Oberfeld  
Cary Oberije

T.F. Oberlander  
Barbara Obermayer-Pietsch  
H.S. Oberoi  
Steve Oberste  
Timm Oberwahrenbrock  
Tatiana Oberyszyn  
Elisabeth Oberzaucher  
Katja Obieglo  
Walter Obiero  
Alex Obinikpo  
Christian Obirikorang  
Elia Obis  
Paula Oblessuc  
Biel Obrador  
Natalie Obrecht  
Carolina Obregon  
Paulo Obreli-Neto  
T. Obreza  
Alastair O'Brien  
Colm O'Brien  
Emily O'Brien  
Erin O'Brien  
Fergal O'Brien  
John O'Brien  
Joseph O'Brien  
Kevin O'Brien  
Kimberly O'Brien  
Louise O'Brien  
Maureen O'Brien  
Meagan O'Brien  
Oliver O'Brien  
Oonagh O'Brien  
Robert O'Brien  
Sarah O'Brien  
Travis O'Brien  
Bill O'Brien-Penney  
Neil O'Brien-Simpson  
Karl Obrietan  
Martin Obrist  
John O'Bryan  
Moirá O'Bryan  
David O'Callaghan  
Emma Kate O'Callaghan  
Joanne Michelle Ocampo  
Alberto Ocaña  
Paola Occhetta  
Alejandro Ocegüera-Figueroa  
Anna Ochab-Marcinek  
Oche Oche  
Begoña Ochoa  
Francisco Ochoa-Corona

Olga Ochoa-Gondar  
Emmanuel Ochola  
Ira Ockene  
David O'Connell  
Grace O'Connell  
Kristen O'Connell  
Mary O'Connell  
Ryan O'Connell  
Anna O'Connor  
Benjamin O'Connor  
Brendan O'Connor  
Christine O'Connor  
Daniel O'Connor  
David O'Connor  
James O'Connor  
Jason O'Connor  
John O'Connor  
Kathleen O'Connor  
Kristian O'Connor  
Mairead O'Connor  
Nancy O'Connor  
Patrick O'Connor  
Peter O'Connor  
Shelby O'Connor  
Tamara O'Connor  
Eiji Oda  
Gisele Oda  
Yasuhiro Oda  
Patrick Odawo  
Francesco Oddone  
Hiroataka Ode  
Eamon O'Dea  
Kieran O'Dea  
Anders Ödeen  
James Odei  
Adam Odell  
Katja Odening  
Helena Ödesjö  
Emmanuel Odic  
Monica Odlare  
Jack Odle  
George O'Doherty  
James Odom  
Robert Odom  
Stephen Odom  
Alison O'Donnell  
Anne O'Donnell  
Colin O'Donnell  
Ryan O'Donnell  
Greg Odorizzi  
Mike O'Driscoll

Nelson O'Driscoll  
Ayodele Odutayo  
Olabisi Oduwole  
Patrick J. O'Dwyer  
Walt Oechel  
Ketil Oedegaard  
Stefan Oehler  
Maren Oelbermann  
Anika Oellrich  
Oene Oenema  
Erich-Christian Oerke  
Ken Oestreich  
Jordan Oestreicher  
William Oetting  
Orit Oettinger-Barak  
Jaap Oever  
Noa Ofen  
Vittoria Offeddu  
Andreas Offenhausser  
Dietmar Offenhuber  
Erika Offerdahl  
Bernard Offmann  
Dana Ofiteru  
Martin O'Flaherty  
Sarah O'Flaherty  
Bahadorreza Ofoghi  
Sandra Ofori  
Ighovwerha Ofotokun  
Enoche Oga  
Toru Oga  
Vasily Oganessian  
James O'Gara  
Anne O'Garra  
Tanya O'Garra  
Sadahisa Ogasawara  
Atsushi Ogata  
Toshiyasu Ogata  
Aiko Ogawa  
Rei Ogawa  
Susumu Ogawa  
T. Ogawa  
Yoko Ogawa  
Romà Ogaya  
Francis Ogbonnaya  
Elizabeth Ogburn  
Bryan Ogden  
Nicholas Ogden  
Rowan Ogeil  
Javier Ogembo  
Robert Ogg  
Mitsunori Ogihara

Gina Ogilvie  
Shuji Ogino  
Soichi Ogishima  
Satoshi Ogiso  
Bjorn Oglænd  
Graham Ogle  
Amanda Oglesby-Sherrouse  
Mylène Ogliastro  
Haluk Ögmen  
Adam Oğna  
Takeshi Ogo  
Martin Ogonowski  
Jernej Ogorevc  
David O'Gorman  
Donal O'Gorman  
Jimmy O'Gorman  
Sven Ove Ögren  
Rajna Ogrin  
Taichi Oguchi  
Emeka Oguejiofor  
Adesola Ogunfowokan  
Ifedayo Ogungbe  
Benson Ogunjimi  
Atsushi Ogura  
Hideki Ogura  
Yuji Ogura  
Ezgi Ogutcen  
Joseph Ogutu  
Chang Seok Oh  
Chang Sik Oh  
Ding Yuan Oh  
Dong-Chan Oh  
Doo-Byoung Oh  
Edwin Oh  
Esther Oh  
Eun Joong Oh  
Goo Taeg Oh  
Hyunsung Oh  
Il-Hoan Oh  
Jong-Ryool Oh  
Juhwan Oh  
Kook-Hwan Oh  
Minyoung Oh  
Myoung-Don Oh  
Sae-Ock Oh  
Sang-Yun Oh  
Se-Hong Oh  
Sei Oh  
Seieun Oh  
Sejong Oh  
Seunghan Oh



Yu-Kyoung Oh  
Justin O'Hagan  
Ken O'Halloran  
Siobhan O'Halloran  
Mamiko Ohara  
Naoya Ohara  
Caitlin O'Hara  
Kevin O'Hara  
Ross O'Hara  
Steven O'Hara  
Mica Ohara-Imaizumi  
Helen O'Hare  
Finbarr O'Harte  
Jun Ohashi  
Kazuharu Ohashi  
Kazutomo Ohashi  
Koji Ohashi  
Kyoko Ohashi  
Fredrik Öhberg  
Kenji Ohgane  
Kazutaka Ohi  
Ryoma Ohi  
Akhiro Ohira  
Masaichi Ohira  
Mitsuru Ohishi  
Noriaki Ohkawa  
Nobuhiro Ohkohchi  
Takayoshi Ohkubo  
Siew-Wan Ohl  
Sven Ohl  
Jan Ohlberger  
Kevin Ohlemiller  
Jennifer Ohlendorf  
Annemarie Ohler  
Uwe Ohler  
Andreas Ohlin  
Mats Ohlin  
Carsten Ohlmann  
Knut Ohlsen  
Henrik Ohlsson  
Robin Ohm  
Dennis Ohman  
Makoto Ohmoto  
Osamu Ohneda  
Koji Ohnishi  
Seiko Ohno  
Richard Ohrbach  
Soren Ohrt-Nissen  
Hisaji Ohshima  
Takayuki Ohshima  
Yusei Ohshima  
Shinichiro Ohshimo  
Jun Ohta  
Yasutaka Ohta  
Misato Ohtani  
Toshiyuki Ohtani  
Susumu Ohtsuka  
Sumio Ohtsuki  
Eric Ohuma  
Yoshinari Ohwaki  
Yusuke Ohya  
Hideaki Oike  
Masahiro Oike  
Vesa Oikonen  
Georgios Oikonomou  
Akio Oishi  
Hisashi Oishi  
Shinya Oishi  
Dario Ojeda  
Francisco Ojeda  
Norma Ojeda  
Anil Ojha  
Heidi Ojha  
Suvash Ojha  
Takao Ojima  
Ayako Oka  
Shinichi Oka  
Kimiko Okabe  
Yoshihiro Okabe  
Hirokazu Okada  
Kazunori Okada  
Morihiro Okada  
Shinji Okada  
Toshiyuki Okada  
Yohei Okada  
Yukinori Okada  
Chika Okafor  
Katsunori Okajima  
Yuko Okamatsu-Ogura  
Hiroshi Okamoto  
Kunio Okamoto  
Maristela Okamoto  
Nobuhiko Okamoto  
Ryuichi Okamoto  
Shigefumi Okamoto  
K. Okamoto-Mizuno  
Tomonori Okamura  
Yasushi Okamura  
Yukiyasu Okamura  
Cahir O'Kane  
Sharon Okanga  
Masanori Okanishi

Sezer Okay  
Ryuichi Okayasu  
Kazuichi Okazaki  
Ken Okazaki  
Shigetoshi Okazaki  
Richard O'Kearney  
F. Robin O'Keefe  
Lannie O'Keefe  
Meredith O'Keefe  
Thomas Okey  
Eiji Oki  
Yasuhiro Oki  
Noriaki Okimoto  
Klaus Okkenhaug  
Chizimuzo Okoli  
Uduak Okomo  
Joshua Okonya  
Michael Okorie  
Andrei Okorokov  
Marina Okoshi  
Atte Oksanen  
Ole Andreas Økstad  
Ozgur Oktem  
Hidehiro Oku  
Hiromi Oku  
Kenji Oku  
Akihiko Okuda  
Yoshinaga Okugawa  
Mobolaji Okulate  
Sakiko Okumoto  
Kenji Okumura  
Satoshi Okumura  
Takahiro Okumura  
Yasuo Okumura  
Michael Okun  
Christopher Okunseri  
Takafumi Okura  
Toru Okuyama  
Derick Okwan-Duodu  
Ifeoma Okwor  
Maite Olaciregui  
Andrew Olagunju  
Iñigo Olalde  
Miguel Olalla-Tárraga  
Wayne Olan  
Lydia Olander  
Funmilola OlaOlorun  
Banky Olatosi  
Richard Olawoyin  
Sebastian Olbrich  
Natasha Olby

James Olcese  
Umberto Olcese  
Vanessa Olcese  
Johan Oldekop  
Catherine Oldenburg  
Joppe Oldenburg  
Sally Olderbak  
Paul Oldham  
William Oldham  
Ben Oldroyd  
Brett Olds  
Tim Olds  
Pedro Olea  
Alvaro Oleaga  
Francisco Olea-Popelka  
Daniel O'Leary  
Heather O'Leary  
John O'Leary  
Mary O'Leary  
Nora Oleas  
Natalia Oleinik  
Mikolaj Olejniczak  
Anna Olejnik  
Malgorzata Olejnik  
Ola Olen  
Balaji Olety  
I. Olfert  
Ivan Olfert  
Emily Olfson  
Natalie Olifiers  
Pierpaolo Olimpieri  
Michael Olin  
Tom Olino  
Ryszard Olinski  
Kevin Olival  
Pilar Olivar  
Andy Olivares  
Christopher Olivares  
Felipe Olivares  
Manuel Olivares  
Rene Olivares-Navarrete  
Aires Oliva-Teles  
M. Foster Olive  
Sébastien Olive  
Irene Olivé  
A. Sofia Oliveira  
André Oliveira  
Andreia Oliveira  
Camila Oliveira  
Carla Oliveira  
Claudio Oliveira

Cleida Oliveira  
Cristieli Oliveira  
Djenane Oliveira  
Eugênio Oliveira  
Fabiano Oliveira  
Fabrício Oliveira  
Fernando Oliveira  
Giancarlo Conde Xavier Oliveira  
Guilherme Oliveira  
Halley Oliveira  
J.T.A. Oliveira  
Jaquelline Oliveira  
Jhones Oliveira  
José Luis Oliveira  
Karlina Oliveira  
Katia Oliveira  
Marcos Oliveira  
Marcus Oliveira  
Maria Oliveira  
Maria Leonor Sarno Oliveira  
Norton Luis Oliveira  
Pedro Oliveira  
Raquel Oliveira  
Rui Oliveira  
Sofia Oliveira  
Vanessa Oliveira  
Pedro Paulo Oliveira Jr.  
João Luís Oliveira-Carvalho  
Joao Paulo Oliveira-Costa  
Anthony Oliver  
Antonio Oliver  
Bonamy Oliver  
Brian Oliver  
Haley Oliver  
Jonathan Oliver  
Jose Oliver  
Melvin J. Oliver  
Nick Oliver  
P. Graham Oliver  
William Oliver  
Antonio Olivera-La Rosa  
Jesus Olivero-Verbel  
Antonio Oliver-Roig  
Chris Olivers  
Alicia Olivier  
Christoph Olivier  
Jill Olivier  
Magali Olivier  
Martin Olivier  
Nicolas Olivier  
Alejandro Olivieri

Anna Olivieri  
Carla Olivieri  
Antonio Oliviero  
Alfonso Olivos-García  
Jean-Marc Olivot  
Jacquie Oliwa  
Maria Olkkonen  
Henri Olkonieni  
B.O. Olley  
Charlotta Olofsson  
Jennifer Olori  
Samantha O'Loughlin  
Samuel Olowookere  
Alexander Olsen  
Anna Olsen  
Erik Olsen  
Jeanine Olsen  
Jorn Olsen  
Margaret Olsen  
Michael Olsen  
Michelle Olsen  
Nora Olsen  
Odd-Arne Olsen  
Richard Olsen  
Robert Olsen  
Sandra Olsen  
Sonja Olsen  
Steven C. Olsen  
Yulia Olshanskaya  
Richard Olshen  
David Olson  
Eric Olson  
Jonathan Olson  
Jordan Olson  
Kenneth Olson  
Lorin Olson  
Mary Olson  
Matthew Olson  
Michael Olson  
Randal Olson  
Sara Olson  
Steven Olson  
Jens Olsson  
Rene Olsthoorn  
Deborah Olszewski  
Horatiu Olteanu  
Allard Olthof  
Margreet Olthof  
Elisa Oltra  
Olushayo Olu  
Bode Olukolu

Aria F. Olumi  
Bolajoko Olusanya  
Bolutife Olusanya  
Oluyinka Olutoye  
Fasina Oluyemi  
Heidi Olze  
Yosuke Omae  
K. Omagari  
Liam O'Mahony  
Siobhain O'Mahony  
Paul O'Maille  
Dervla O'Malley  
Ronan O'Malley  
Dario Omanovic  
Daibhid O'Maoileidigh  
M. O'Mara  
Takeshi Omasa  
Kazumi Omata  
Perera Omaththage  
Michael Ombrello  
Gilbert Omenn  
Jeff Omens  
Diana Omigie  
Elisa Omodei  
Bernard Omolo  
George Omondi  
Lanre Omotayo  
Celso Omoto  
Dalia Omran  
Anders Omsland  
Ahmet Omurtag  
Geoffrey Omuse  
Olusegun Onabajo  
Nobuyuki Onai  
Mark Onaitis  
Cagdas Onal  
Cem Onal  
Aytug Onan  
Altan Onat  
Patrick Onck  
Paola Ondarza  
Graziano Onder  
Lucas Onder  
Andrew Onderdonk  
Pascale Ondoa  
Brian Ondov  
Vladan Ondrej  
Nancy Ondrusek  
Wanda O'Neal  
Wesley O'Neal  
Dion O'Neale

F.G. (Barry) O'Neil  
Alex O'Neill  
Charles O'Neill  
Eric O'Neill  
Hester O'Neill  
Ian O'Neill  
Jennifer O'Neill  
Liam O'Neill  
Sandra O'Neill  
Stephen O'Neill  
Chin Siang Ong  
Han Kiat Ong  
Hui Xin Ong  
Irene Ong  
Janus Ong  
Jennifer Ong  
Lee-Ling Ong  
Pei-Shi Ong  
Peter Ong  
Qunya Ong  
John Ong'echa  
Francesco Onida  
Lucy Onime  
Gabriel Oniscu  
Maurizio Onisto  
Anna Oniszczyk  
Itay Onn  
Lim Onn  
Atsushi Ono  
Koh Ono  
Kotaro Ono  
Takahiro Ono  
Yusuke Ono  
Yusuke Onoda  
Osamu Onodera  
Silvano Onofri  
Akio Onogi  
Anyebe Onoja  
Sam Ononge  
Dorothy Ononokpono  
IfeanyiChukwu Onor  
Kenji Onoue  
Ikushi Onozaki  
Todd Ontl  
Alexey Onufriev  
Ezenwa Onyemata  
Alphonsus Onyiriuka  
Akishi Ooi  
Geraldine Ooi  
Keith Ooi  
Kenneth Ooi

Charlotte Oomen  
Antonius Oomens  
Chris Oostenbrink  
Mark Oostergo  
Peter Oosterveer  
Mariska Oosterveld-Vlug  
Egbert Oosterwijk  
Agnieszka Opala-Berdzik  
Bertram Opalka  
Juan Opazo  
Ghislain Opdenakker  
Brent Opell  
Stanley Opella  
Joseph Opferman  
Roel Ophoff  
George Opie  
George Opit  
Alexander Opitz  
Bastian Opitz  
Stephen Opiyo  
Christian Opländer  
Mark Opler  
Onya Opota  
Alexander Opotowsky  
Steffen Oppel  
Ben Oppenheim  
Sara Oppenheim  
Charles Opperman  
Brenda Oppert  
Pablo Oppezzo  
Anne Oppliger  
Kwaku Oppong Asante  
Alice Oprandi  
Patricia Opresko  
Tanja Opriessnig  
Trine Opstad  
Marjorie Opuni  
Michael O'Quinn  
Etti Or  
Alexander Oraevsky  
Berk Orakcioglu  
Hakan Oral  
Richard Oram  
Christine Oramasionwu  
J.B. Orange  
Nicole Orange  
Elkanah Orang'o  
Peter Orazem  
Tamas Orban  
Jean-Jacques Orban de Xivry  
Amaia Orbea

Paul Orchard  
Francesc Ordines  
Monica Ordway  
Jacopo Oreglia  
Ciara O'Reilly  
Michael O'Reilly  
Philip O'Reilly  
Elena Orekhova  
Laura Orellana  
Elena Orellano  
Pablo Orellano  
Ronald Oremland  
Mark Oremus  
Aharon Oren  
Eyal Oren  
Isabel Orenes  
Ivan Oresnik  
Sotiris Orfanidis  
Alberto Orfao  
Caroline Orfila  
Jason Organ  
Jose Orgaz  
Dennis Orgill  
Virginie Orgogozo  
Eniyu Oriero  
Pedro Orihuela  
Michele Orini  
Koichi Orino  
Zane Orinska  
Nancy Oriol  
Timothy Oriss  
Jérôme Orivel  
Rita Orji  
Pamela Orjuela-Sanchez  
Augusto Orlandi  
Rosaria Orlandi  
Jéssica Orlandin  
Giuseppe Orlando  
Stefano Orlando  
Marek Orlik  
Thorsten Orlikowsky  
David Orlov  
Sergei Orlov  
Marina Orlova  
David Orlovich  
Irene Orlow  
Seth Orlow  
John Orlowski  
Rena Orman  
Ian Orme  
Mark Orme

Michelle Ormseth  
Joanna Orne-Gliemann  
Patricia Ornelas  
Fernanda Ornellas  
David Ornelles  
Asher Ornoy  
Katherine Ornstein  
Uri Oron  
Yoram Oron  
Jorge Orós  
Eyleen O'Rourke  
Kathleen O'Rourke  
Anthony Orr  
Brent Orr  
Miranda Orr  
Robin Orr  
Teri Orr  
Isabel Orriss  
Christina Orru  
Andrea Orsi  
Caitlin Orsini  
Giovanna Orsini  
Nicola Orsini  
Sara Orsini  
Anna Orsola  
Nada Orsolich  
Christophe Orssaud  
Brian Ort  
Donald Ort  
Enrique Ortega  
Francisco Ortega  
Hugo Ortega  
Jason Ortega  
Sofia Ortega  
Christian Ortega-Loubon  
Joel Ortega-Ortiz  
Guadalupe Ortega-Pierres  
Julio Ortega-Usobiaga  
Norberto Ortego-Centeno  
Jason Ortegren  
Thomas Ortel  
Monica Ortenzi  
Michael Orth  
Guillermo Orti  
Tania Ortiga-Carvalho  
Ana Ortin  
Alberto Ortiz  
Alexis Ortiz  
Amber Ortiz  
Jorge Ortiz  
Rodomiro Ortiz

Angelica Ortiz de Gortari  
Eduardo Ortiz-Cruz  
Christian Ortolf  
David Orton  
Ipek Oruc  
Raoul Orvieto  
Benjamin Ory  
Ahmad Oryan  
Miguel O'Ryan  
Steven Orzack  
Stephan Orzada  
Francesco Orzi  
Eneko Osaba  
Naoki Osada  
Tadeusz Osadnik  
Luciana Osaki  
Shahrokh Osaloo  
Remus Osan  
Takahiro Osawa  
Takeshi Osawa  
Sophia Osawe  
Nosayaba Osazuwa-Peters  
Danny Osborne  
James Osborne  
Melisa Osborne  
Nicholas Osborne  
Olivia Osborne  
Jan Oscarsson  
Padraig O'Seaghdha  
Jacek Osek  
Simona Osella  
Cecilia Osera  
Mohammad Oshaghi  
Nir Osherov  
Junko Oshima  
Minako Oshima  
Tadayuki Oshima  
Yuji Oshima  
Mitsuo Oshimura  
Atsushi Oshio  
Attila Osi  
Faith Osier  
Hans-Juergen Osigus  
Evgeny Osin  
Carole Oskeritzian  
Andrea Oskis  
Augustine Osman  
Malina Osman  
Mohammed Osman  
Clive Osmond  
Deanna L. Osmond

Johan Osorio  
Flávia Osório  
Gustavo Ospina-Tascón  
Pauly Ossenblok  
Alice Ossoli  
Mike Osta  
Michael Ostacher  
Dirk Ostareck  
Teresa Ostaszewska  
Anna-Lena Ostberg  
Gudrun Østby  
Bertram Ostendorf  
Florian Ostendorf  
Harriet Oster  
Henrik Oster  
Michael Oster  
Philipp Oster  
Karen Østergaard  
Marlies Ostermann  
Nikolaus Osterrieder  
Nancy Ostiguy  
Örjan Östman  
Bjørn Østman  
Julia Ostner  
Ljerka Ostojic  
Julie Ostrander  
Lisa Ostrin  
Jamie Ostrov  
Irina Ostrovnaya  
Yan Ostrovski  
Andrew N. Ostrovsky  
Bruce Ostrow  
Jerzy Ostrowski  
Michael Ostrowsky  
Renato Ostuni  
Vikas Ostwal  
Marcin Osuchowski  
Yutaka Osuga  
Mitsuru Osugi  
Cait O'Sullivan  
David O'Sullivan  
Donal O'Sullivan  
Patricia O'Sullivan  
Mathias Osvath  
Szabolcs Osváth  
Andrew Oswald  
Sara Oswald  
Hideaki Ota  
Masao Ota  
Motonori Ota  
Tatsuya Ota

Yuko Ota  
David Otaegui  
Fernando Otálora-Luna  
Gonzalo Otazu  
Juan Oteiza  
Dan Otelea  
Selda Oterkus  
Jaime Otero  
Larissa Otero  
Olga Otero  
Pablo Otero  
Jorge Otero-Millan  
Carol Otey  
Noordin Othman  
Shatrah Othman  
Megan Othus  
Perrie O'Tierney-Ginn  
Simon Otjes  
Renee Otmar  
Timo Otonkoski  
Ronan F O'Toole  
Atsushi Otsuka  
Toshiaki Otsuka  
Yasumasa Otsuka  
Denise Otsuki  
Naofumi Otsuru  
Jurg Ott  
Sascha Ott  
Marte Otten  
Andrew Ottens  
Jonathan Otter  
Leo Otterbein  
Katrín Ottersbach  
Inger Ottestad  
Carola Otth Lagunas  
Cornelia Ottiger  
Laura Ottini  
Karl Öttl  
Caitlin Otto  
Cynthia Otto  
Kevin Otto  
Lars-Gernot Otto  
Mirko Otto  
Ross Otto  
Siegmar Otto  
Timothy Otto  
Claudio Ottoni  
Eduardo Ottoni  
Carl-Otto Ottosen  
Akaninyene Otu  
Hasan Otu

Gail Otulakowski  
Daniel Otzen  
Chun-Quan Ou  
Fang-Shu Ou  
Horng-Yih Ou  
Qishui Ou  
Shuo-Ming Ou  
Yu-Yen Ou  
Mehdi Ouaïssi  
Eric Ouattara  
H. Oubrahim  
Lavi Oud  
Raoul Oudejans  
André Lin Ouédraogo  
Scot Ouellette  
Dennis Ougrin  
Lobna Ouldamer  
Merry Oursler  
Tiago Outeiro  
Alex Outkin  
David Outomuro  
Wayne Outten  
Janneke Ouwerkerk  
Ronald Ouwerkerk  
Bo Ouyang  
Fang Ouyang  
Hanlin Ouyang  
Hongsheng Ouyang  
Jia Ouyang  
Lin Ouyang  
Min Ouyang  
Minhui Ouyang  
Pengfei Ouyang  
Meric Ovacik  
Dan Ovando  
Attila Ovari  
Howard Ovens  
David Over  
Nickola Overall  
Annelies Overbeek  
Paul Overbeek  
Anna Overby  
Casey Overby  
Simon Overduin  
Gudrun Overesch  
Oyvind Overli  
Robert Overman  
Acacia Overoye  
Turner Overton  
Ken Overturf  
Krista Overvliet

Per Ovesen  
Lenin Oviedo  
Mahmoudreza Ovissipour  
Catherine Ovitt  
Pavel Ovseiko  
Mohammad Owais  
Caroline Owen  
Jennifer Owen  
Julia Owen  
Leah Owen  
Mechelle Owen  
Michael Owen  
Nick Owen  
Robert Owen  
Hannah Owens  
Leigh Owens  
Max Owens  
Rebecca Owens  
Christopher J. Owers  
Patrick Owili  
Peter Owira  
Olumuyiwa Owolabi  
Jan W. Owsinski  
Cynthia Owsley  
Chuma Owuamalam  
Aniwaa Owusu Obeng  
Ebenezer Owusu-Addo  
Annette Oxenius  
Gregory Oxenkrug  
David Oxman  
Jun-ichi Oyama  
Lila Oyama  
Tonny Oyana  
Jan Oyebode  
Olusola Oyedeji  
Yomi Oyelere  
Ganiyu Oyetibo  
Olufemi Oyewole  
Adewale Oyeyemi  
Soo Oym  
Michiko Oyoshi  
Murat Öz  
Amit Oza  
Shefali Oza  
Kiyokazu Ozaki  
Kouichi Ozaki  
Sevgi Ozalevli  
Shelly Ozark  
Kazunari Ozasa  
Nesrin Ozatac  
Keiko Ozato

Koichiro Ozawa  
Tetsutaro Ozawa  
Umut Ozbek  
Yusuf Ozbel  
Ertugrul Ozbudak  
Aydogan Ozcan  
Orhan Ozcan  
Berkay Ozcelik  
G. Ozcengiz  
Engin Ozcivici  
Derya Ozdemir  
P. Hande Özdinler  
Mutlu Özdoğan  
Isao Oze  
Bulent Ozel  
Margareth Ozelo  
Mustafa Ozen  
Volkan Özenci  
Egon Ozer  
Mahmut Ozer  
Nesrin Ozer  
Michal Ozery-Flato  
Ceyda Ozfidan-Konakci  
Eren Ozguven  
Gül Özhan  
Lijo Cherian Ozhathil  
Mukoso Ozieh  
Hakan Ozkan  
Selman Özkan  
Yusuf Özkay  
Elif Ozkirimli Olmez  
David Ozog  
Ryoji Ozono  
Mecit Öztop  
Selcen Öztürk  
Anna Ozyczka

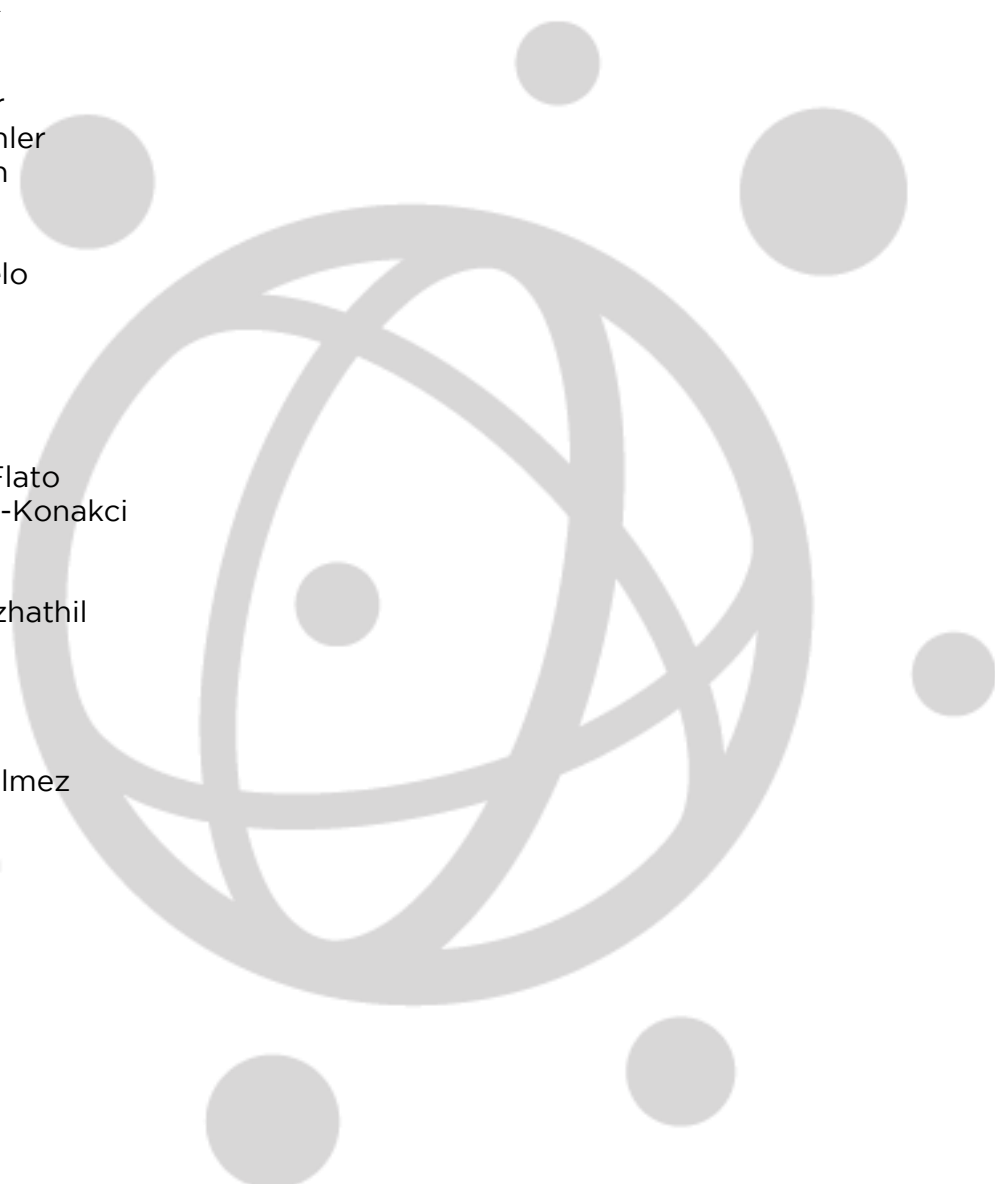

Source: https://storage.googleapis.com/plos-corpus-prod/10.1371/journal.pone.0174259/1/pone.0174259.s004.PDF
